# Supplementary material for: Single-Particle Characterization of SARS-CoV-2 Isoelectric Point and Comparison to Variants of Interest
Source: MDPI journal article supplement (doi:10.3390/microorganisms9081606), 2021-07-28
Supplement: s1 [file s1]

# Single-Particle Characterization of SARS-CoV-2 Isoelectric Point and Comparison to Variants of Interest

## (Raw Data Supplemental)

Oluwatoyin Areo<sup>1,2</sup>, Pratik U. Joshi<sup>1,2</sup>, Mark Obrenovich<sup>3,4,5</sup>, Moncef Tayahi<sup>6</sup>, and Caryn L. Heldt<sup>1,2\*</sup>

<sup>1</sup> Department of Chemical Engineering, Michigan Technological University, Houghton, MI USA.

<sup>2</sup> Health Research Institute, Michigan Technological University, Houghton, MI

<sup>3</sup> Louis Stokes Department of Veterans Affairs Medical Center, Department of Infectious Disease, Cleveland, OH 44106 USA.

<sup>4</sup> The Gilgamesh Foundation for Medical Science, Research and Education, Cleveland, OH 44116 USA

<sup>5</sup> Case Western Reserve University, Department of Chemistry, Cleveland, OH USA.

<sup>6</sup> University of Cincinnati, Department of Electrical Engineering and Computer Science, Cincinnati, OH 45221

\*Corresponding author: 1400 Townsend Dr., Houghton, MI 49931, USA

[heldt@mtu.edu](mailto:heldt@mtu.edu), phone 906-487-1134

Table RD1. Mean peak adhesion forces between quaternary ammonium group (positive charge) and SARS-CoV-2 (USA-WA1/2020) at different pH used for Figure 1B. S1, S2, and S3 represent three separately immobilized solutions containing gamma irradiated virus stock.

| S1              | S2  | S3  | S1              | S2  | S3  | S1              | S2   | S3   | S1              | S2   | S3   | S1              | S2   | S3   |
|-----------------|-----|-----|-----------------|-----|-----|-----------------|------|------|-----------------|------|------|-----------------|------|------|
| pH 4            |     |     | pH 5            |     |     | pH 5.5          |      |      | pH 6            |      |      | pH 7            |      |      |
| Peak Force (pN) |     |     | Peak Force (pN) |     |     | Peak Force (pN) |      |      | Peak Force (pN) |      |      | Peak Force (pN) |      |      |
| 654             | 436 | 276 | 395             | 285 | 263 | 867             | 1399 | 1936 | 1926            | 2955 | 1106 | 1900            | 117  | 1965 |
| 637             | 321 | 271 | 384             | 452 | 250 | 934             | 1363 | 1936 | 1191            | 2483 | 1114 | 2513            | 2630 | 1878 |
| 637             | 344 | 270 | 384             | 514 | 259 | 969             | 1185 | 1767 | 1315            | 2553 | 1261 | 2506            | 2338 | 1929 |
| 591             | 367 | 283 | 420             | 489 | 412 | 906             | 1371 | 1718 | 998             | 2522 | 1570 | 2579            | 2484 | 1834 |
| 683             | 235 | 288 | 361             | 452 | 366 | 913             | 1245 | 2190 | 1261            | 2437 | 1632 | 2550            | 2367 | 1936 |
| 0               | 229 | 257 | 393             | 463 | 403 | 928             | 1376 | 2386 | 2151            | 2684 | 1377 | 2433            | 2301 | 2433 |
| 384             | 161 | 246 | 400             | 501 | 374 | 852             | 1497 | 2186 | 1772            | 2375 | 1478 | 2484            | 2163 | 2375 |
| 545             | 172 | 249 | 409             | 523 | 392 | 939             | 1512 | 2362 | 1818            | 2421 | 1609 | 2382            | 2667 | 2280 |
| 459             | 115 | 253 | 341             | 519 | 402 | 951             | 1489 | 2364 | 1949            | 2127 | 1176 | 2345            | 2674 | 2236 |
| 470             | 138 | 266 | 375             | 480 | 383 | 900             | 1356 | 2237 | 2112            | 1841 | 1230 | 2185            | 2579 | 2177 |
| 258             | 115 | 277 | 417             | 516 | 278 | 839             | 1426 | 2179 | 905             | 1965 | 1145 | 2280            | 2579 | 2199 |
| 407             | 132 | 272 | 371             | 378 | 344 | 900             | 1371 | 2170 | 905             | 1493 | 1060 | 2046            | 2579 | 2323 |

|     |     |     |
|-----|-----|-----|
| 333 | 293 | 291 |
| 390 | 270 | 279 |
| 402 | 321 | 292 |
| 516 | 315 | 322 |
| 717 | 298 | 362 |
| 562 | 161 | 310 |
| 533 | 138 | 333 |
| 602 | 132 | 285 |
| 23  | 178 | 251 |
| 0   | 0   | 253 |
| 252 | 407 | 258 |
| 69  | 344 | 244 |
| 0   | 270 | 251 |
| 562 | 281 | 221 |
| 522 | 465 | 224 |
| 545 | 264 | 222 |
| 390 | 178 | 223 |
| 505 | 241 | 166 |
| 556 | 178 | 145 |
| 539 | 143 | 120 |
| 568 | 75  | 151 |
| 551 | 195 | 151 |
| 447 | 155 | 118 |
| 465 | 0   | 32  |
| 442 | 247 | 206 |
| 482 | 86  | 106 |
| 396 | 120 | 95  |
| 442 | 109 | 66  |
| 476 | 149 | 201 |
| 459 | 80  | 194 |
| 396 | 304 | 253 |
| 493 | 384 | 194 |
| 568 | 356 | 174 |
| 344 | 447 | 208 |
| 430 | 321 | 201 |
| 402 | 178 | 192 |
| 304 | 115 | 212 |
| 361 | 132 | 145 |
| 120 | 161 | 190 |
| 0   | 195 | 188 |
| 350 | 161 | 154 |

|     |     |     |
|-----|-----|-----|
| 362 | 486 | 356 |
| 366 | 440 | 492 |
| 393 | 412 | 544 |
| 325 | 437 | 501 |
| 294 | 389 | 554 |
| 306 | 423 | 529 |
| 291 | 408 | 525 |
| 324 | 395 | 535 |
| 375 | 420 | 532 |
| 371 | 310 | 501 |
| 356 | 322 | 559 |
| 374 | 210 | 455 |
| 359 | 38  | 455 |
| 392 | 266 | 458 |
| 340 | 285 | 458 |
| 437 | 170 | 492 |
| 384 | 306 | 396 |
| 301 | 278 | 343 |
| 219 | 279 | 474 |
| 201 | 545 | 417 |
| 132 | 544 | 381 |
| 198 | 562 | 471 |
| 171 | 483 | 457 |
| 598 | 535 | 434 |
| 528 | 529 | 445 |
| 573 | 526 | 467 |
| 532 | 501 | 463 |
| 567 | 485 | 496 |
| 547 | 539 | 431 |
| 544 | 520 | 460 |
| 553 | 557 | 392 |
| 553 | 539 | 366 |
| 523 | 528 | 356 |
| 439 | 526 | 244 |
| 449 | 563 | 324 |
| 501 | 508 | 301 |
| 448 | 525 | 228 |
| 375 | 517 | 226 |
| 482 | 551 | 219 |
| 492 | 597 | 210 |
| 520 | 576 | 195 |

|      |      |      |
|------|------|------|
| 923  | 1351 | 2192 |
| 860  | 1419 | 833  |
| 972  | 1373 | 941  |
| 865  | 1072 | 873  |
| 906  | 1376 | 820  |
| 893  | 1383 | 687  |
| 895  | 1306 | 880  |
| 801  | 1376 | 840  |
| 934  | 1341 | 812  |
| 928  | 1313 | 873  |
| 926  | 1431 | 888  |
| 949  | 1263 | 1413 |
| 926  | 1426 | 1401 |
| 873  | 1222 | 1508 |
| 911  | 1195 | 1493 |
| 873  | 1233 | 1355 |
| 888  | 1366 | 1504 |
| 1000 | 1358 | 1373 |
| 918  | 1202 | 1277 |
| 918  | 1539 | 1225 |
| 934  | 1283 | 1361 |
| 837  | 1534 | 1350 |
| 977  | 1311 | 1317 |
| 908  | 1489 | 1292 |
| 903  | 1688 | 1413 |
| 941  | 1336 | 1323 |
| 903  | 1313 | 1043 |
| 837  | 1182 | 1277 |
| 1142 | 1197 | 1223 |
| 1094 | 1685 | 1125 |
| 1129 | 1690 | 2600 |
| 1025 | 1741 | 2651 |
| 1010 | 1685 | 2696 |
| 1000 | 1494 | 880  |
| 964  | 1733 | 893  |
| 1061 | 1705 | 873  |
| 1099 | 1670 | 883  |
| 1231 | 1761 | 870  |
| 900  | 1791 | 827  |
| 1063 | 1426 | 903  |
| 974  | 1404 | 829  |

|      |      |      |
|------|------|------|
| 1215 | 1888 | 449  |
| 1114 | 1609 | 1385 |
| 2135 | 1725 | 1276 |
| 1996 | 1772 | 1075 |
| 2120 | 1191 | 990  |
| 1973 | 2561 | 1176 |
| 2491 | 2259 | 1129 |
| 2228 | 2104 | 843  |
| 2050 | 2367 | 789  |
| 2220 | 1949 | 928  |
| 2290 | 2646 | 959  |
| 2290 | 2808 | 1215 |
| 1485 | 2684 | 0    |
| 1632 | 2630 | 0    |
| 1888 | 2754 | 1385 |
| 1764 | 2816 | 959  |
| 1648 | 2847 | 395  |
| 1168 | 3288 | 433  |
| 1215 | 2955 | 456  |
| 1184 | 3141 | 449  |
| 1300 | 3063 | 565  |
| 1215 | 2785 | 348  |
| 503  | 2855 | 526  |
| 828  | 2483 | 805  |
| 603  | 1864 | 495  |
| 704  | 1679 | 534  |
| 1547 | 1919 | 921  |
| 1478 | 1640 | 255  |
| 1586 | 1423 | 774  |
| 1849 | 2050 | 774  |
| 1539 | 1748 | 1238 |
| 1346 | 1276 | 1052 |
| 1276 | 2004 | 2197 |
| 928  | 2855 | 2143 |
| 1601 | 3063 | 2251 |
| 1570 | 2994 | 2661 |
| 1663 | 2646 | 2437 |
| 1354 | 2638 | 2723 |
| 1524 | 2692 | 2568 |
| 1470 | 1733 | 2089 |
| 1369 | 1656 | 2120 |

|      |      |      |
|------|------|------|
| 2090 | 1622 | 2265 |
| 2133 | 1856 | 2192 |
| 1995 | 1395 | 2119 |
| 2046 | 1585 | 2513 |
| 1527 | 1330 | 2557 |
| 438  | 2112 | 2382 |
| 1301 | 2163 | 2513 |
| 2009 | 2250 | 2550 |
| 2090 | 102  | 2177 |
| 2689 | 285  | 2221 |
| 2608 | 2667 | 2126 |
| 2638 | 2681 | 2090 |
| 2652 | 2638 | 2163 |
| 2623 | 2630 | 183  |
| 2557 | 2550 | 2214 |
| 2681 | 848  | 22   |
| 2623 | 329  | 1973 |
| 2608 | 585  | 2075 |
| 2550 | 424  | 2185 |
| 2433 | 921  | 2031 |
| 2353 | 899  | 2068 |
| 2543 | 1081 | 2133 |
| 2470 | 1235 | 2170 |
| 2470 | 1279 | 869  |
| 2630 | 1242 | 913  |
| 2484 | 2499 | 964  |
| 2681 | 2440 | 979  |
| 2667 | 2470 | 1264 |
| 2711 | 2470 | 2338 |
| 2528 | 2499 | 2608 |
| 2470 | 2652 | 2506 |
| 2513 | 2535 | 2214 |
| 2484 | 2638 | 2265 |
| 2543 | 2659 | 2499 |
| 1176 | 2491 | 2389 |
| 1286 | 1834 | 2243 |
| 1257 | 2090 | 2272 |
| 1154 | 2002 | 2272 |
| 1366 | 1973 | 2470 |
| 2528 | 1768 | 2491 |
| 2543 | 2243 | 2382 |

|     |     |     |
|-----|-----|-----|
| 40  | 115 | 14  |
| 6   | 0   | 0   |
| 0   | 109 | 23  |
| 17  | 132 | 120 |
| 17  | 206 | 45  |
| 0   | 178 | 11  |
| 11  | 579 | 2   |
| 80  | 356 | 11  |
| 212 | 413 | 181 |
| 0   | 516 | 192 |
| 229 | 493 | 210 |
| 166 | 218 | 174 |
| 201 | 120 | 81  |
| 0   | 206 | 59  |
| 241 | 310 | 38  |
| 212 | 178 | 54  |
| 258 | 333 | 0   |
| 115 | 252 | 43  |
| 120 | 252 | 0   |
| 0   | 465 | 18  |
| 69  | 212 | 68  |
| 247 | 465 | 199 |
| 201 | 505 | 244 |
| 184 | 367 | 201 |
| 229 | 218 | 267 |
| 178 | 0   | 260 |
| 247 | 327 | 167 |
| 218 | 264 | 154 |
| 281 | 275 | 147 |
| 161 | 327 | 154 |
| 229 | 333 | 181 |
| 287 | 482 | 217 |
| 258 | 597 | 242 |
| 275 | 447 | 273 |
| 247 | 396 | 228 |
| 218 | 574 | 154 |
| 166 | 189 | 251 |
| 281 | 275 | 108 |
| 235 | 270 | 226 |
| 270 | 252 | 334 |
| 275 | 264 | 260 |

|     |     |     |
|-----|-----|-----|
| 526 | 539 | 269 |
| 498 | 499 | 256 |
| 399 | 511 | 297 |
| 389 | 562 | 279 |
| 372 | 514 | 347 |
| 359 | 513 | 434 |
| 359 | 511 | 454 |
| 542 | 517 | 451 |
| 576 | 251 | 433 |
| 482 | 198 | 494 |
| 471 | 231 | 371 |
| 551 | 239 | 442 |
| 387 | 245 | 389 |
| 409 | 235 | 446 |
| 350 | 231 | 408 |
| 356 | 247 | 470 |
| 374 | 279 | 477 |
| 542 | 269 | 513 |
| 607 | 567 | 485 |
| 575 | 573 | 528 |
| 658 | 542 | 556 |
| 669 | 528 | 547 |
| 615 | 591 | 489 |
| 560 | 544 | 510 |
| 619 | 554 | 499 |
| 603 | 575 | 495 |
| 612 | 578 | 470 |
| 114 | 508 | 468 |
| 458 | 700 | 483 |
| 460 | 731 | 467 |
| 437 | 696 | 468 |
| 405 | 663 | 517 |
| 403 | 658 | 449 |
| 567 | 671 | 443 |
| 564 | 717 | 508 |
| 591 | 709 | 426 |
| 604 | 569 | 452 |
| 643 | 547 | 392 |
| 594 | 499 | 458 |
| 652 | 502 | 440 |
| 629 | 464 | 467 |

|      |      |      |
|------|------|------|
| 926  | 1389 | 847  |
| 934  | 1338 | 949  |
| 913  | 1313 | 956  |
| 1018 | 1351 | 951  |
| 931  | 1391 | 979  |
| 944  | 1323 | 962  |
| 895  | 1275 | 946  |
| 796  | 1278 | 931  |
| 885  | 956  | 2326 |
| 875  | 1087 | 2360 |
| 822  | 1102 | 1090 |
| 822  | 1034 | 1094 |
| 878  | 931  | 1125 |
| 865  | 951  | 1078 |
| 883  | 976  | 1090 |
| 939  | 880  | 1054 |
| 1045 | 984  | 1061 |
| 832  | 1044 | 918  |
| 956  | 1472 | 902  |
| 956  | 1341 | 878  |
| 956  | 1383 | 1361 |
| 908  | 1253 | 1330 |
| 885  | 1509 | 1408 |
| 873  | 1391 | 1323 |
| 962  | 1416 | 1395 |
| 959  | 1373 | 1330 |
| 880  | 1396 | 1283 |
| 0    | 1361 | 1379 |
| 842  | 1300 | 1335 |
| 875  | 1371 | 1404 |
| 895  | 1389 | 2340 |
| 883  | 1351 | 2244 |
| 811  | 1434 | 2308 |
| 822  | 1321 | 2373 |
| 847  | 1419 | 2304 |
| 837  | 1376 | 2219 |
| 819  | 1361 | 2290 |
| 786  | 1283 | 2302 |
| 845  | 1487 | 2315 |
| 987  | 1409 | 2221 |
| 885  | 1293 | 2460 |

|      |      |      |
|------|------|------|
| 1323 | 1980 | 2120 |
| 1392 | 1694 | 2344 |
| 557  | 596  | 201  |
| 750  | 572  | 727  |
| 843  | 665  | 797  |
| 379  | 596  | 232  |
| 503  | 1122 | 224  |
| 1570 | 704  | 588  |
| 1586 | 1137 | 1013 |
| 1756 | 2104 | 1238 |
| 1694 | 2491 | 1501 |
| 1346 | 2460 | 0    |
| 1276 | 2375 | 1300 |
| 1168 | 2158 | 1044 |
| 1532 | 1439 | 681  |
| 1447 | 1385 | 1741 |
| 1671 | 1416 | 1122 |
| 1501 | 2452 | 526  |
| 1377 | 2398 | 1346 |
| 1586 | 2468 | 0    |
| 1810 | 2429 | 619  |
| 1037 | 2127 | 1114 |
| 828  | 990  | 1331 |
| 1145 | 719  | 1400 |
| 820  | 1462 | 696  |
| 1292 | 1849 | 1052 |
| 805  | 2375 | 549  |
| 874  | 2476 | 952  |
| 1547 | 2390 | 975  |
| 1238 | 2599 | 1037 |
| 1926 | 2476 | 449  |
| 1949 | 1741 | 642  |
| 2460 | 1725 | 689  |
| 2390 | 1787 | 704  |
| 3203 | 1934 | 812  |
| 2746 | 1238 | 1423 |
| 3040 | 1578 | 1184 |
| 1795 | 2058 | 1679 |
| 1857 | 1671 | 2104 |
| 1833 | 1663 | 2367 |
| 1849 | 1710 | 1246 |

|      |      |      |
|------|------|------|
| 2543 | 2192 | 658  |
| 2616 | 2250 | 2484 |
| 2703 | 1754 | 1659 |
| 2601 | 1717 | 1600 |
| 2652 | 168  | 1512 |
| 2645 | 2784 | 1593 |
| 2513 | 2718 | 1571 |
| 2280 | 2820 | 2258 |
| 2148 | 2842 | 2353 |
| 2455 | 2433 | 2323 |
| 2112 | 2477 | 2367 |
| 2243 | 2287 | 2375 |
| 2119 | 2214 | 2309 |
| 1812 | 2309 | 2389 |
| 1965 | 1739 | 2338 |
| 1900 | 1739 | 2309 |
| 1666 | 1878 | 2375 |
| 161  | 1914 | 2221 |
| 2703 | 1819 | 2901 |
| 2703 | 2155 | 2828 |
| 2725 | 2082 | 2733 |
| 2579 | 2433 | 2659 |
| 2718 | 2155 | 1819 |
| 2630 | 2228 | 1827 |
| 2616 | 2667 | 1702 |
| 2528 | 2689 | 1790 |
| 2630 | 2754 | 1629 |
| 2696 | 2477 | 1856 |
| 2550 | 2491 | 1987 |
| 2564 | 2017 | 1819 |
| 2484 | 1469 | 1936 |
| 2440 | 1797 | 1768 |
| 2280 | 1615 | 1673 |
| 2674 | 1819 | 1965 |
| 2579 | 2404 | 2163 |
| 2762 | 2703 | 2594 |
| 2776 | 2930 | 2543 |
| 2659 | 2477 | 2375 |
| 2550 | 2470 | 2389 |
| 2586 | 2586 | 2294 |
| 2594 | 2521 | 2287 |

|     |     |     |
|-----|-----|-----|
| 218 | 447 | 269 |
| 195 | 338 | 296 |
| 264 | 0   | 298 |
| 80  | 384 | 237 |
| 298 | 0   | 95  |
| 293 | 241 | 280 |
| 281 | 252 | 217 |
| 258 | 264 | 194 |
| 275 | 229 | 172 |
| 252 | 258 | 179 |
| 315 | 356 | 185 |
| 275 | 321 | 79  |
| 304 | 304 | 0   |
| 350 | 252 | 233 |
| 0   | 0   | 190 |
| 287 | 488 | 34  |
| 333 | 539 | 57  |
| 361 | 511 | 258 |
| 0   | 522 | 233 |
| 356 | 511 | 190 |
| 333 | 293 | 34  |
| 229 | 327 | 57  |
| 264 | 350 | 258 |
| 333 | 298 | 442 |
| 298 | 178 | 436 |
| 356 | 631 | 402 |
| 402 | 608 | 407 |
| 270 | 614 | 367 |
| 384 | 619 | 379 |
| 126 | 201 | 390 |
| 402 | 224 | 327 |
| 333 | 229 | 344 |
| 270 | 195 | 419 |
| 304 | 224 | 361 |
| 373 | 447 | 407 |
| 287 | 476 | 338 |
| 235 | 430 | 298 |
| 505 | 442 | 338 |
| 252 | 447 | 379 |
| 465 | 367 | 310 |
| 465 | 247 | 333 |

|     |     |     |
|-----|-----|-----|
| 638 | 533 | 423 |
| 690 | 494 | 460 |
| 452 | 492 | 457 |
| 383 | 535 | 436 |
| 427 | 412 | 0   |
| 476 | 451 | 479 |
| 439 | 467 | 470 |
| 471 | 585 | 483 |
| 445 | 609 | 451 |
| 544 | 597 | 449 |
| 590 | 625 | 448 |
| 563 | 612 | 454 |
| 579 | 559 | 514 |
| 638 | 570 | 445 |
| 476 | 600 | 476 |
| 554 | 541 | 0   |
| 483 | 567 | 426 |
| 544 | 332 | 378 |
| 566 | 403 | 402 |
| 461 | 399 | 403 |
| 499 | 281 | 403 |
| 517 | 278 | 405 |
| 535 | 375 | 412 |
| 480 | 387 | 434 |
| 427 | 356 | 442 |
| 436 | 304 | 380 |
| 411 | 325 | 520 |
| 483 | 451 | 573 |
| 440 | 427 | 584 |
| 430 | 476 | 572 |
| 548 | 446 | 544 |
| 572 | 465 | 538 |
| 584 | 499 | 505 |
| 582 | 489 | 513 |
| 556 | 489 | 468 |
| 393 | 420 | 474 |
| 522 | 474 | 380 |
| 417 | 675 | 332 |
| 494 | 705 | 383 |
| 389 | 650 | 396 |
| 421 | 675 | 359 |

|      |      |      |
|------|------|------|
| 1018 | 1426 | 2544 |
| 1010 | 1318 | 2502 |
| 916  | 1456 | 2707 |
| 977  | 1386 | 2654 |
| 944  | 1358 | 2531 |
| 972  | 1411 | 2268 |
| 964  | 1376 | 2308 |
| 2083 | 1700 | 2491 |
| 2003 | 1474 | 2411 |
| 2079 | 1587 | 3095 |
| 1956 | 1633 | 997  |
| 1925 | 1716 | 964  |
| 1970 | 1386 | 972  |
| 1981 | 1499 | 944  |
| 1760 | 1560 | 911  |
| 1595 | 1502 | 918  |
| 2622 | 1575 | 944  |
| 2531 | 1856 | 827  |
| 2569 | 1804 | 974  |
| 2567 | 1869 | 895  |
| 2542 | 1811 | 926  |
| 2522 | 1889 | 862  |
| 2422 | 1869 | 903  |
| 2288 | 1970 | 817  |
| 2326 | 1849 | 865  |
| 2812 | 1851 | 860  |
| 2745 | 1939 | 870  |
| 2738 | 1119 | 850  |
| 2636 | 1039 | 2373 |
| 2643 | 936  | 2389 |
| 2553 | 989  | 2438 |
| 2585 | 1092 | 2444 |
| 1776 | 1067 | 2302 |
| 2322 | 1107 | 2498 |
| 1876 | 1097 | 2259 |
| 1938 | 1072 | 2400 |
| 2048 | 1117 | 1491 |
| 2549 | 1771 | 1493 |
| 1918 | 1630 | 1520 |
| 2052 | 1710 | 1395 |
| 1831 | 1726 | 1417 |

|      |      |      |
|------|------|------|
| 921  | 1493 | 1640 |
| 1903 | 1594 | 1191 |
| 1416 | 1779 | 1331 |
| 1795 | 1485 | 1423 |
| 1408 | 1269 | 1903 |
| 1524 | 1416 | 1656 |
| 1501 | 1284 | 2035 |
| 1408 | 1323 | 1857 |
| 1671 | 2243 | 2127 |
| 1919 | 2228 | 3350 |
| 2151 | 2220 | 1741 |
| 2143 | 2205 | 2290 |
| 1934 | 2019 | 3419 |
| 2004 | 1160 | 1717 |
| 2050 | 1779 | 1679 |
| 2081 | 1926 | 1539 |
| 1988 | 1307 | 1748 |
| 1988 | 1060 | 1895 |
| 0    | 952  | 3125 |
| 2545 | 1021 | 1338 |
| 2174 | 1656 | 1586 |
| 2182 | 1501 | 3265 |
| 2243 | 1710 | 3002 |
| 1818 | 1408 | 3381 |
| 1679 | 1501 | 719  |
| 2019 | 1323 | 526  |
| 1547 | 1191 | 0    |
| 1462 | 1586 | 0    |
| 1354 | 1408 | 634  |
| 1238 | 1454 | 797  |
| 1617 | 1903 | 681  |
| 1864 | 1671 | 0    |
| 1447 | 1787 | 843  |
| 1532 | 1671 | 719  |
| 1454 | 1772 | 797  |
| 2630 | 1717 | 882  |
| 2197 | 1748 | 1091 |
| 1524 | 1640 | 936  |
| 1462 | 1710 | 928  |
| 2174 | 1632 | 0    |
| 2089 | 1671 | 3009 |

|      |      |      |
|------|------|------|
| 2484 | 2543 | 2185 |
| 2499 | 2601 | 2126 |
| 1147 | 2557 | 2112 |
| 1147 | 877  | 1900 |
| 1125 | 599  | 1805 |
| 1235 | 2550 | 2228 |
| 1286 | 935  | 2075 |
| 2725 | 848  | 2236 |
| 2681 | 2309 | 1987 |
| 2667 | 387  | 2199 |
| 2667 | 2214 | 2082 |
| 2594 | 2448 | 2258 |
| 2638 | 2506 | 2345 |
| 2703 | 2674 | 2185 |
| 2696 | 2652 | 2280 |
| 2681 | 2586 | 2170 |
| 2711 | 2506 | 2470 |
| 0    | 2564 | 2543 |
| 1527 | 2616 | 2250 |
| 1425 | 2769 | 2272 |
| 1374 | 2645 | 2484 |
| 2404 | 2623 | 2638 |
| 2455 | 2630 | 2535 |
| 2389 | 2762 | 2564 |
| 2221 | 2828 | 2360 |
| 2185 | 2601 | 2426 |
| 0    | 2696 | 2199 |
| 446  | 2725 | 2214 |
| 0    | 2543 | 2177 |
| 428  | 321  | 2126 |
| 481  | 336  | 2206 |
| 324  | 2740 | 2923 |
| 262  | 2667 | 3237 |
| 402  | 3017 | 3134 |
| 0    | 2002 | 3142 |
| 525  | 2908 | 2776 |
| 560  | 3902 | 2579 |
| 857  | 2521 | 2484 |
| 630  | 2638 | 2411 |
| 0    | 2411 | 2689 |
| 813  | 2484 | 2543 |

|     |     |      |
|-----|-----|------|
| 298 | 315 | 281  |
| 384 | 229 | 1496 |
| 344 | 321 | 1540 |
| 0   | 298 | 1455 |
| 402 | 333 | 1413 |
| 321 | 350 | 1491 |
| 327 | 235 | 1449 |
| 321 | 281 | 1502 |
| 384 | 602 | 1585 |
| 310 | 671 | 1770 |
| 0   | 619 | 1560 |
| 442 | 522 | 1670 |
| 413 | 637 | 1747 |
| 384 | 258 | 1364 |
| 419 | 252 | 1355 |

|     |     |     |
|-----|-----|-----|
| 495 | 678 | 356 |
| 412 | 612 | 350 |
| 448 | 653 | 340 |
| 429 | 689 | 366 |
| 562 | 700 | 312 |
| 522 | 705 | 510 |
| 595 | 502 | 575 |
| 567 | 517 | 556 |
| 581 | 533 | 523 |
| 584 | 491 | 600 |
| 569 | 505 | 480 |
| 591 | 562 | 505 |
| 661 | 476 | 529 |
| 530 | 504 | 505 |
| 0   | 505 | 485 |

|      |      |      |
|------|------|------|
| 1687 | 1733 | 2039 |
| 2016 | 1562 | 2085 |
| 1331 | 1748 | 1983 |
| 1273 | 1680 | 2003 |
| 1356 | 1834 | 2097 |
| 1358 | 1741 | 1181 |
| 1205 | 1650 | 1092 |
| 1290 | 1643 | 1221 |
| 1321 | 1572 | 1214 |
| 1180 | 1519 | 945  |
| 1260 | 1600 | 2373 |
| 1160 | 1552 | 2377 |
| 1205 | 1519 | 1979 |
| 1207 | 1668 | 1217 |
| 1197 | 1492 | 1370 |

|      |      |      |
|------|------|------|
| 2096 | 1447 | 2893 |
| 1106 | 1625 | 2878 |
| 921  | 2298 | 3040 |
| 936  | 2321 | 2437 |
| 596  | 2630 | 1656 |
| 2476 | 2584 | 1872 |
| 2661 | 1895 | 1988 |
| 2267 | 944  | 2058 |
| 2220 | 735  | 2135 |
| 2321 | 1160 | 2120 |
| 1215 | 1903 | 1756 |
| 1284 | 1980 | 1949 |
| 2336 | 1973 | 1957 |
| 2375 | 1586 | 1934 |
| 2174 | 1996 | 2050 |

|      |      |      |
|------|------|------|
| 787  | 2579 | 2082 |
| 1014 | 2521 | 2068 |
| 962  | 2594 | 2046 |
| 542  | 2564 | 2097 |
| 393  | 2696 | 2206 |
| 70   | 2630 | 2148 |
| 61   | 2638 | 2228 |
| 726  | 1943 | 2112 |
| 1014 | 2258 | 2119 |
| 735  | 1783 | 2148 |
| 700  | 2024 | 2448 |
| 1233 | 2133 | 2601 |
| 1032 | 2594 | 2535 |
| 87   | 2579 | 2623 |
| 1049 | 2689 | 2521 |

Table RD2. Mean peak adhesion forces between carboxyl group (negative charge) and SARS-CoV-2 (USA-WA1/2020) at different pH used for Figure 1C. S1, S2, and S3 represent three separately immobilized solutions containing gamma irradiated virus stock.

| S1              | S2   | S3   | S1              | S2  | S3   | S1              | S2  | S3  | S1              | S2  | S3  | S1              | S2 | S3 |
|-----------------|------|------|-----------------|-----|------|-----------------|-----|-----|-----------------|-----|-----|-----------------|----|----|
| pH 4            |      |      | pH 5            |     |      | pH 5.5          |     |     | pH 6            |     |     | pH 7            |    |    |
| Peak Force (pN) |      |      | Peak Force (pN) |     |      | Peak Force (pN) |     |     | Peak Force (pN) |     |     | Peak Force (pN) |    |    |
| 1395            | 754  | 848  | 390             | 499 | 317  | 326             | 262 | 28  | 77              | 0   | 96  | 7               | 0  | 0  |
| 1329            | 754  | 918  | 552             | 386 | 430  | 368             | 220 | 283 | 121             | 0   | 89  | 4               | 0  | 0  |
| 1403            | 824  | 933  | 231             | 239 | 244  | 467             | 106 | 177 | 108             | 2   | 108 | 5               | 0  | 0  |
| 1271            | 680  | 923  | 617             | 446 | 0    | 439             | 297 | 0   | 113             | 0   | 113 | 4               | 0  | 0  |
| 1139            | 680  | 863  | 223             | 191 | 300  | 305             | 64  | 0   | 94              | 0   | 123 | 2               | 0  | 0  |
| 867             | 709  | 739  | 491             | 126 | 674  | 78              | 220 | 220 | 0               | 0   | 66  | 9               | 0  | 0  |
| 1131            | 714  | 695  | 576             | 779 | 0    | 191             | 340 | 0   | 108             | 0   | 55  | 7               | 0  | 0  |
| 925             | 655  | 804  | 617             | 629 | 24   | 0               | 305 | 220 | 112             | 0   | 76  | 4               | 0  | 0  |
| 966             | 0    | 799  | 528             | 800 | 175  | 35              | 347 | 149 | 121             | 0   | 81  | 9               | 0  | 0  |
| 850             | 0    | 809  | 329             | 710 | 605  | 0               | 262 | 99  | 112             | 0   | 57  | 2               | 0  | 0  |
| 1940            | 709  | 645  | 621             | 296 | 605  | 262             | 234 | 0   | 102             | 72  | 13  | 9               | 0  | 0  |
| 1907            | 675  | 670  | 560             | 467 | 609  | 135             | 255 | 241 | 68              | 100 | 112 | 5               | 0  | 0  |
| 1692            | 700  | 600  | 0               | 150 | 637  | 106             | 319 | 0   | 121             | 81  | 125 | 14              | 0  | 0  |
| 2039            | 754  | 700  | 471             | 438 | 759  | 276             | 0   | 149 | 91              | 0   | 83  | 37              | 0  | 0  |
| 1890            | 957  | 635  | 787             | 382 | 852  | 227             | 205 | 0   | 28              | 66  | 55  | 9               | 0  | 0  |
| 537             | 819  | 754  | 487             | 686 | 605  | 220             | 0   | 28  | 117             | 134 | 87  | 27              | 0  | 0  |
| 611             | 868  | 754  | 467             | 869 | 483  | 276             | 368 | 241 | 136             | 140 | 93  | 11              | 0  | 0  |
| 545             | 843  | 824  | 820             | 812 | 511  | 0               | 220 | 57  | 163             | 155 | 110 | 7               | 0  | 0  |
| 504             | 883  | 824  | 414             | 698 | 475  | 269             | 326 | 7   | 200             | 98  | 23  | 7               | 0  | 0  |
| 545             | 888  | 759  | 658             | 629 | 479  | 163             | 0   | 312 | 157             | 94  | 96  | 4               | 0  | 0  |
| 1247            | 690  | 893  | 593             | 0   | 881  | 0               | 205 | 255 | 176             | 0   | 125 | 92              | 0  | 39 |
| 1222            | 645  | 685  | 856             | 365 | 471  | 127             | 319 | 99  | 115             | 0   | 125 | 7               | 0  | 37 |
| 1321            | 566  | 749  | 211             | 593 | 893  | 28              | 305 | 21  | 112             | 0   | 117 | 7               | 0  | 46 |
| 1337            | 888  | 853  | 142             | 467 | 670  | 382             | 170 | 0   | 102             | 15  | 134 | 5               | 0  | 35 |
| 1131            | 516  | 794  | 175             | 487 | 974  | 404             | 340 | 35  | 140             | 0   | 70  | 4               | 0  | 0  |
| 2378            | 833  | 933  | 300             | 564 | 589  | 510             | 382 | 142 | 123             | 93  | 113 | 16              | 0  | 0  |
| 2402            | 784  | 943  | 276             | 621 | 840  | 588             | 0   | 418 | 51              | 93  | 110 | 11              | 0  | 51 |
| 2295            | 749  | 948  | 414             | 653 | 897  | 687             | 113 | 241 | 64              | 0   | 121 | 7               | 0  | 46 |
| 2435            | 794  | 903  | 775             | 414 | 1035 | 489             | 559 | 382 | 55              | 76  | 106 | 11              | 0  | 0  |
| 2510            | 838  | 1007 | 808             | 735 | 739  | 496             | 397 | 248 | 62              | 62  | 130 | 9               | 0  | 0  |
| 974             | 1106 | 724  | 1051            | 589 | 211  | 418             | 198 | 319 | 81              | 85  | 102 | 9               | 0  | 0  |
| 1090            | 1065 | 744  | 820             | 467 | 239  | 418             | 177 | 0   | 96              | 106 | 102 | 7               | 0  | 0  |
| 958             | 958  | 843  | 382             | 414 | 438  | 446             | 368 | 0   | 104             | 93  | 108 | 5               | 0  | 0  |
| 1214            | 1131 | 838  | 637             | 528 | 686  | 0               | 0   | 170 | 0               | 87  | 142 | 5               | 0  | 0  |

|      |      |      |
|------|------|------|
| 1313 | 1032 | 799  |
| 1552 | 1131 | 809  |
| 1527 | 1098 | 665  |
| 1808 | 1106 | 675  |
| 1626 | 1156 | 729  |
| 1610 | 1197 | 759  |
| 504  | 0    | 744  |
| 594  | 1131 | 814  |
| 702  | 1337 | 829  |
| 537  | 1263 | 829  |
| 578  | 1445 | 799  |
| 1420 | 1445 | 784  |
| 1131 | 1387 | 819  |
| 1032 | 1065 | 814  |
| 949  | 1230 | 754  |
| 817  | 1321 | 938  |
| 0    | 1379 | 898  |
| 132  | 1040 | 923  |
| 33   | 1048 | 953  |
| 0    | 1073 | 1027 |
| 2378 | 1048 | 953  |
| 2320 | 1024 | 769  |
| 2576 | 1379 | 769  |
| 2576 | 1263 | 833  |
| 2633 | 1247 | 744  |
| 1461 | 1247 | 764  |
| 1469 | 1247 | 729  |
| 1197 | 1247 | 779  |
| 1370 | 1354 | 719  |
| 1230 | 1337 | 685  |
| 834  | 1263 | 590  |
| 883  | 1313 | 700  |
| 784  | 817  | 829  |
| 883  | 949  | 819  |
| 991  | 867  | 873  |
| 660  | 883  | 908  |
| 677  | 999  | 838  |
| 462  | 1139 | 933  |
| 611  | 1230 | 784  |
| 627  | 1164 | 789  |
| 1032 | 1172 | 923  |

|      |     |      |
|------|-----|------|
| 706  | 605 | 881  |
| 0    | 625 | 0    |
| 844  | 520 | 540  |
| 154  | 507 | 694  |
| 110  | 613 | 235  |
| 0    | 625 | 227  |
| 134  | 856 | 0    |
| 597  | 796 | 487  |
| 434  | 881 | 690  |
| 524  | 877 | 718  |
| 357  | 974 | 694  |
| 166  | 824 | 158  |
| 118  | 929 | 223  |
| 175  | 869 | 1396 |
| 227  | 605 | 0    |
| 727  | 865 | 284  |
| 292  | 889 | 219  |
| 621  | 613 | 264  |
| 1047 | 613 | 256  |
| 982  | 909 | 284  |
| 1189 | 548 | 686  |
| 954  | 313 | 593  |
| 1372 | 0   | 451  |
| 589  | 227 | 0    |
| 284  | 511 | 244  |
| 560  | 268 | 284  |
| 629  | 268 | 150  |
| 467  | 390 | 260  |
| 446  | 459 | 0    |
| 357  | 658 | 252  |
| 455  | 430 | 0    |
| 244  | 341 | 540  |
| 706  | 479 | 373  |
| 532  | 934 | 231  |
| 641  | 897 | 479  |
| 645  | 698 | 317  |
| 296  | 856 | 235  |
| 645  | 686 | 264  |
| 426  | 446 | 0    |
| 495  | 714 | 300  |
| 300  | 946 | 589  |

|     |     |     |
|-----|-----|-----|
| 319 | 120 | 0   |
| 375 | 411 | 0   |
| 389 | 0   | 368 |
| 0   | 0   | 297 |
| 404 | 0   | 78  |
| 368 | 191 | 0   |
| 0   | 227 | 0   |
| 496 | 333 | 177 |
| 191 | 262 | 241 |
| 0   | 609 | 0   |
| 375 | 567 | 269 |
| 113 | 482 | 135 |
| 715 | 411 | 361 |
| 305 | 411 | 0   |
| 0   | 312 | 85  |
| 290 | 297 | 135 |
| 220 | 198 | 177 |
| 255 | 0   | 21  |
| 220 | 71  | 0   |
| 0   | 234 | 0   |
| 78  | 0   | 191 |
| 354 | 163 | 191 |
| 312 | 305 | 227 |
| 305 | 262 | 0   |
| 220 | 460 | 191 |
| 368 | 418 | 269 |
| 0   | 354 | 0   |
| 425 | 220 | 113 |
| 333 | 170 | 64  |
| 439 | 156 | 212 |
| 241 | 354 | 0   |
| 333 | 0   | 142 |
| 248 | 375 | 135 |
| 248 | 510 | 326 |
| 85  | 0   | 354 |
| 397 | 312 | 397 |
| 241 | 319 | 389 |
| 0   | 276 | 0   |
| 305 | 453 | 474 |
| 149 | 453 | 446 |
| 156 | 397 | 517 |

|     |     |     |
|-----|-----|-----|
| 83  | 77  | 95  |
| 85  | 100 | 119 |
| 121 | 110 | 113 |
| 0   | 125 | 115 |
| 83  | 130 | 127 |
| 66  | 70  | 142 |
| 83  | 21  | 89  |
| 102 | 32  | 121 |
| 127 | 2   | 0   |
| 96  | 0   | 0   |
| 147 | 0   | 0   |
| 104 | 134 | 36  |
| 19  | 147 | 0   |
| 0   | 132 | 60  |
| 62  | 138 | 66  |
| 47  | 138 | 0   |
| 70  | 176 | 132 |
| 72  | 155 | 66  |
| 76  | 180 | 76  |
| 64  | 161 | 66  |
| 49  | 153 | 45  |
| 68  | 77  | 79  |
| 81  | 72  | 98  |
| 125 | 85  | 70  |
| 93  | 125 | 0   |
| 112 | 85  | 0   |
| 59  | 149 | 0   |
| 98  | 112 | 0   |
| 64  | 89  | 0   |
| 98  | 104 | 9   |
| 87  | 53  | 94  |
| 104 | 43  | 125 |
| 112 | 23  | 102 |
| 108 | 40  | 77  |
| 72  | 30  | 40  |
| 30  | 32  | 77  |
| 210 | 93  | 100 |
| 0   | 100 | 87  |
| 215 | 106 | 115 |
| 193 | 112 | 113 |
| 189 | 140 | 100 |

|    |     |    |
|----|-----|----|
| 5  | 0   | 21 |
| 7  | 0   | 0  |
| 9  | 0   | 0  |
| 5  | 0   | 0  |
| 7  | 0   | 0  |
| 5  | 0   | 0  |
| 5  | 0   | 0  |
| 19 | 0   | 0  |
| 62 | 0   | 0  |
| 30 | 0   | 0  |
| 57 | 0   | 0  |
| 69 | 0   | 0  |
| 7  | 0   | 0  |
| 5  | 0   | 0  |
| 2  | 0   | 0  |
| 7  | 0   | 0  |
| 78 | 0   | 0  |
| 5  | 0   | 0  |
| 4  | 0   | 0  |
| 7  | 0   | 0  |
| 87 | 0   | 0  |
| 83 | 0   | 0  |
| 48 | 0   | 0  |
| 69 | 0   | 0  |
| 7  | 0   | 0  |
| 9  | 0   | 0  |
| 4  | 0   | 19 |
| 19 | 121 | 0  |
| 4  | 0   | 0  |
| 5  | 0   | 0  |
| 23 | 0   | 0  |
| 16 | 0   | 0  |
| 9  | 18  | 0  |
| 7  | 14  | 0  |
| 5  | 0   | 28 |
| 9  | 0   | 0  |
| 7  | 0   | 0  |
| 5  | 0   | 0  |
| 4  | 0   | 0  |
| 2  | 0   | 0  |
| 12 | 0   | 0  |

|      |      |     |
|------|------|-----|
| 776  | 1048 | 0   |
| 999  | 1156 | 0   |
| 636  | 1114 | 665 |
| 916  | 1015 | 734 |
| 0    | 1114 | 0   |
| 0    | 1271 | 511 |
| 8    | 826  | 0   |
| 0    | 793  | 0   |
| 0    | 817  | 585 |
| 462  | 867  | 0   |
| 520  | 759  | 0   |
| 388  | 0    | 283 |
| 528  | 0    | 729 |
| 520  | 58   | 695 |
| 1131 | 272  | 566 |
| 1057 | 41   | 625 |
| 1123 | 0    | 0   |
| 982  | 413  | 179 |
| 834  | 396  | 0   |
| 0    | 338  | 342 |
| 1544 | 545  | 417 |
| 1445 | 363  | 685 |
| 1395 | 776  | 799 |
| 1494 | 768  | 690 |
| 1436 | 809  | 635 |
| 2014 | 842  | 0   |
| 1659 | 669  | 660 |
| 1841 | 1304 | 749 |
| 1907 | 1271 | 719 |
| 1791 | 1205 | 704 |
| 0    | 1247 | 888 |
| 0    | 1346 | 556 |
| 347  | 322  | 516 |
| 305  | 256  | 595 |
| 297  | 322  | 571 |
| 1791 | 223  | 620 |
| 1824 | 347  | 630 |
| 1998 | 710  | 179 |
| 1907 | 726  | 660 |
| 2072 | 966  | 645 |
| 338  | 908  | 799 |

|      |     |      |
|------|-----|------|
| 114  | 641 | 459  |
| 300  | 658 | 536  |
| 134  | 783 | 637  |
| 101  | 800 | 256  |
| 686  | 649 | 349  |
| 682  | 605 | 170  |
| 727  | 966 | 414  |
| 1003 | 41  | 698  |
| 905  | 0   | 434  |
| 0    | 0   | 402  |
| 406  | 260 | 211  |
| 662  | 0   | 272  |
| 674  | 199 | 0    |
| 284  | 101 | 625  |
| 187  | 414 | 1035 |
| 195  | 288 | 986  |
| 0    | 325 | 1019 |
| 166  | 653 | 1039 |
| 597  | 515 | 1270 |
| 613  | 564 | 1871 |
| 268  | 487 | 1611 |
| 459  | 597 | 1270 |
| 491  | 881 | 1477 |
| 0    | 852 | 1757 |
| 0    | 422 | 1051 |
| 0    | 767 | 844  |
| 483  | 763 | 909  |
| 438  | 856 | 796  |
| 296  | 621 | 820  |
| 487  | 674 | 471  |
| 613  | 816 | 467  |
| 1120 | 877 | 0    |
| 1209 | 710 | 414  |
| 1189 | 682 | 0    |
| 1226 | 568 | 345  |
| 572  | 787 | 556  |
| 942  | 771 | 0    |
| 722  | 0   | 77   |
| 1153 | 406 | 227  |
| 1246 | 0   | 187  |
| 483  | 426 | 235  |

|     |     |     |
|-----|-----|-----|
| 205 | 503 | 524 |
| 651 | 276 | 659 |
| 0   | 333 | 135 |
| 595 | 354 | 411 |
| 460 | 0   | 241 |
| 184 | 28  | 701 |
| 389 | 375 | 234 |
| 14  | 0   | 78  |
| 283 | 71  | 0   |
| 0   | 135 | 290 |
| 120 | 340 | 467 |
| 120 | 184 | 0   |
| 57  | 227 | 382 |
| 255 | 347 | 503 |
| 0   | 262 | 397 |
| 361 | 163 | 234 |
| 305 | 227 | 184 |
| 312 | 241 | 460 |
| 489 | 0   | 368 |
| 156 | 297 | 411 |
| 425 | 411 | 276 |
| 389 | 0   | 467 |
| 319 | 177 | 347 |
| 354 | 227 | 276 |
| 326 | 227 | 567 |
| 538 | 156 | 418 |
| 0   | 227 | 177 |
| 538 | 290 | 170 |
| 276 | 0   | 382 |
| 333 | 0   | 432 |
| 241 | 248 | 297 |
| 0   | 241 | 297 |
| 127 | 319 | 191 |
| 0   | 220 | 241 |
| 297 | 0   | 184 |
| 0   | 21  | 177 |
| 0   | 276 | 312 |
| 14  | 0   | 397 |
| 113 | 305 | 227 |
| 220 | 21  | 340 |
| 0   | 283 | 375 |

|     |     |     |
|-----|-----|-----|
| 223 | 64  | 168 |
| 144 | 76  | 70  |
| 93  | 115 | 115 |
| 64  | 83  | 17  |
| 140 | 98  | 110 |
| 62  | 112 | 40  |
| 212 | 138 | 0   |
| 202 | 138 | 0   |
| 164 | 89  | 176 |
| 200 | 108 | 123 |
| 225 | 70  | 113 |
| 123 | 62  | 112 |
| 193 | 93  | 191 |
| 142 | 93  | 0   |
| 142 | 106 | 0   |
| 140 | 117 | 0   |
| 123 | 112 | 0   |
| 91  | 108 | 0   |
| 106 | 132 | 0   |
| 129 | 121 | 0   |
| 112 | 117 | 140 |
| 47  | 121 | 134 |
| 45  | 151 | 113 |
| 113 | 127 | 77  |
| 87  | 138 | 47  |
| 104 | 181 | 189 |
| 193 | 155 | 98  |
| 193 | 153 | 159 |
| 191 | 189 | 113 |
| 153 | 140 | 163 |
| 189 | 68  | 0   |
| 91  | 55  | 0   |
| 89  | 0   | 0   |
| 151 | 96  | 0   |
| 45  | 62  | 0   |
| 70  | 170 | 110 |
| 291 | 138 | 19  |
| 208 | 166 | 43  |
| 225 | 119 | 76  |
| 195 | 130 | 102 |
| 189 | 164 | 142 |

|    |    |     |
|----|----|-----|
| 9  | 0  | 0   |
| 7  | 0  | 0   |
| 7  | 0  | 0   |
| 4  | 0  | 0   |
| 4  | 0  | 0   |
| 7  | 25 | 0   |
| 7  | 0  | 0   |
| 7  | 0  | 0   |
| 5  | 0  | 0   |
| 9  | 0  | 0   |
| 5  | 0  | 0   |
| 7  | 0  | 0   |
| 7  | 0  | 0   |
| 5  | 0  | 0   |
| 32 | 18 | 0   |
| 9  | 0  | 0   |
| 9  | 0  | 0   |
| 9  | 18 | 0   |
| 9  | 0  | 0   |
| 4  | 0  | 0   |
| 5  | 0  | 0   |
| 4  | 0  | 0   |
| 7  | 0  | 0   |
| 2  | 0  | 0   |
| 4  | 0  | 0   |
| 9  | 0  | 103 |
| 7  | 0  | 0   |
| 5  | 0  | 0   |
| 9  | 0  | 0   |
| 9  | 0  | 0   |
| 7  | 0  | 0   |
| 5  | 0  | 0   |
| 37 | 0  | 0   |
| 9  | 0  | 0   |
| 4  | 0  | 0   |
| 7  | 0  | 51  |
| 5  | 0  | 50  |
| 11 | 0  | 44  |
| 9  | 0  | 43  |
| 9  | 0  | 46  |
| 9  | 0  | 41  |



|      |      |     |
|------|------|-----|
| 90   | 776  | 546 |
| 233  | 1420 | 0   |
| 164  | 1106 | 427 |
| 63   | 1280 | 605 |
| 137  | 1304 | 387 |
| 365  | 1230 | 571 |
| 417  | 759  | 536 |
| 106  | 231  | 397 |
| 407  | 223  | 610 |
| 5    | 281  | 0   |
| 11   | 363  | 709 |
| 5    | 206  | 288 |
| 5    | 859  | 496 |
| 16   | 867  | 0   |
| 0    | 883  | 0   |
| 217  | 1271 | 447 |
| 0    | 1131 | 432 |
| 132  | 124  | 258 |
| 565  | 1255 | 0   |
| 481  | 793  | 0   |
| 407  | 1048 | 660 |
| 476  | 1032 | 0   |
| 523  | 1032 | 615 |
| 1258 | 982  | 650 |
| 1284 | 842  | 0   |
| 1437 | 958  | 967 |
| 1374 | 958  | 819 |
| 1363 | 1106 | 957 |
| 127  | 182  | 967 |
| 106  | 140  | 769 |
| 137  | 495  | 833 |
| 74   | 545  | 843 |
| 243  | 594  | 719 |
| 1178 | 537  | 784 |

|      |      |      |
|------|------|------|
| 459  | 377  | 256  |
| 313  | 1246 | 475  |
| 382  | 1477 | 0    |
| 625  | 1810 | 629  |
| 658  | 1818 | 467  |
| 994  | 1717 | 499  |
| 532  | 698  | 552  |
| 658  | 731  | 564  |
| 605  | 889  | 917  |
| 873  | 739  | 877  |
| 877  | 597  | 1076 |
| 901  | 929  | 921  |
| 751  | 873  | 917  |
| 763  | 978  | 1526 |
| 235  | 986  | 1384 |
| 0    | 877  | 856  |
| 203  | 613  | 1477 |
| 333  | 507  | 1376 |
| 1611 | 641  | 791  |
| 1538 | 605  | 808  |
| 2013 | 475  | 1197 |
| 1932 | 231  | 873  |
| 1688 | 524  | 869  |
| 0    | 101  | 341  |
| 357  | 406  | 0    |
| 414  | 231  | 451  |
| 308  | 1928 | 576  |
| 284  | 1680 | 714  |
| 0    | 1843 | 333  |
| 0    | 1761 | 223  |
| 0    | 1749 | 227  |
| 0    | 824  | 280  |
| 146  | 248  | 211  |
| 0    | 771  | 114  |

|     |     |     |
|-----|-----|-----|
| 382 | 0   | 248 |
| 368 | 205 | 262 |
| 482 | 347 | 0   |
| 0   | 0   | 212 |
| 198 | 319 | 0   |
| 0   | 0   | 375 |
| 0   | 0   | 559 |
| 191 | 368 | 489 |
| 220 | 191 | 382 |
| 255 | 482 | 0   |
| 0   | 326 | 297 |
| 269 | 312 | 106 |
| 212 | 28  | 234 |
| 0   | 0   | 361 |
| 149 | 404 | 283 |
| 85  | 0   | 517 |
| 503 | 0   | 524 |
| 283 | 0   | 0   |
| 170 | 106 | 319 |
| 368 | 191 | 0   |
| 397 | 7   | 28  |
| 347 | 113 | 326 |
| 418 | 184 | 382 |
| 28  | 347 | 439 |
| 397 | 248 | 404 |
| 439 | 375 | 149 |
| 375 | 227 | 163 |
| 418 | 361 | 198 |
| 538 | 609 | 120 |
| 0   | 524 | 78  |
| 305 | 297 | 21  |
| 312 | 375 | 227 |
| 0   | 404 | 0   |
| 361 | 227 | 0   |

|     |     |     |
|-----|-----|-----|
| 134 | 170 | 164 |
| 229 | 13  | 104 |
| 219 | 178 | 106 |
| 132 | 204 | 81  |
| 113 | 149 | 172 |
| 110 | 147 | 136 |
| 140 | 155 | 151 |
| 132 | 159 | 187 |
| 136 | 149 | 193 |
| 153 | 185 | 178 |
| 125 | 172 | 180 |
| 68  | 164 | 170 |
| 112 | 127 | 34  |
| 102 | 170 | 119 |
| 113 | 0   | 68  |
| 234 | 34  | 43  |
| 244 | 87  | 0   |
| 217 | 93  | 9   |
| 231 | 77  | 0   |
| 100 | 108 | 0   |
| 144 | 0   | 72  |
| 176 | 123 | 76  |
| 140 | 13  | 98  |
| 93  | 115 | 108 |
| 89  | 115 | 85  |
| 197 | 91  | 85  |
| 25  | 96  | 108 |
| 193 | 106 | 108 |
| 202 | 119 | 115 |
| 202 | 112 | 93  |
| 181 | 119 | 77  |
| 221 | 77  | 60  |
| 206 | 104 | 83  |
| 215 | 138 | 108 |

|    |   |    |
|----|---|----|
| 7  | 0 | 44 |
| 9  | 0 | 0  |
| 4  | 0 | 53 |
| 25 | 0 | 51 |
| 9  | 0 | 0  |
| 7  | 0 | 0  |
| 30 | 0 | 0  |
| 2  | 0 | 0  |
| 25 | 0 | 0  |
| 19 | 0 | 0  |
| 2  | 0 | 0  |
| 9  | 0 | 0  |
| 5  | 0 | 0  |
| 11 | 0 | 0  |
| 7  | 0 | 0  |
| 5  | 0 | 0  |
| 5  | 0 | 0  |
| 5  | 0 | 0  |
| 5  | 0 | 0  |
| 23 | 0 | 0  |
| 7  | 0 | 0  |
| 7  | 0 | 0  |
| 9  | 0 | 0  |
| 14 | 0 | 0  |
| 7  | 0 | 0  |
| 5  | 0 | 0  |
| 5  | 0 | 0  |
| 11 | 0 | 0  |
| 5  | 0 | 0  |
| 9  | 0 | 0  |
| 7  | 0 | 0  |
| 9  | 0 | 0  |
| 9  | 0 | 0  |
| 7  | 0 | 0  |

Table RD3: Surface Residues of 6VSB, 7LWV, and 7LYQ obtained from PyMol V2.4.1

| 6VSB  |      |      |       |      |      |       |      |
|-------|------|------|-------|------|------|-------|------|
| chain | resi | resn | chain | resi | resn | chain | resi |
| A     | 27   | ALA  | B     | 27   | ALA  | C     | 27   |
| A     | 28   | TYR  | B     | 28   | TYR  | C     | 28   |
| A     | 29   | THR  | B     | 29   | THR  | C     | 29   |
| A     | 30   | ASN  | B     | 30   | ASN  | C     | 30   |
| A     | 32   | PHE  | B     | 31   | SER  | C     | 32   |
| A     | 33   | THR  | B     | 32   | PHE  | C     | 33   |
| A     | 34   | ARG  | B     | 33   | THR  | C     | 34   |
| A     | 38   | TYR  | B     | 34   | ARG  | C     | 36   |
| A     | 39   | PRO  | B     | 37   | TYR  | C     | 37   |
| A     | 40   | ASP  | B     | 38   | TYR  | C     | 38   |
| A     | 41   | LYS  | B     | 39   | PRO  | C     | 39   |
| A     | 42   | VAL  | B     | 40   | ASP  | C     | 40   |
| A     | 44   | ARG  | B     | 41   | LYS  | C     | 41   |
| A     | 45   | SER  | B     | 42   | VAL  | C     | 42   |
| A     | 46   | SER  | B     | 44   | ARG  | C     | 43   |
| A     | 47   | VAL  | B     | 45   | SER  | C     | 44   |
| A     | 48   | LEU  | B     | 46   | SER  | C     | 45   |
| A     | 49   | HIS  | B     | 47   | VAL  | C     | 46   |
| A     | 50   | SER  | B     | 48   | LEU  | C     | 47   |
| A     | 51   | THR  | B     | 49   | HIS  | C     | 48   |
| A     | 52   | GLN  | B     | 50   | SER  | C     | 49   |
| A     | 53   | ASP  | B     | 51   | THR  | C     | 50   |
| A     | 54   | LEU  | B     | 52   | GLN  | C     | 51   |
| A     | 57   | PRO  | B     | 53   | ASP  | C     | 52   |
| A     | 58   | PHE  | B     | 54   | LEU  | C     | 53   |
| A     | 59   | PHE  | B     | 56   | LEU  | C     | 54   |
| A     | 60   | SER  | B     | 57   | PRO  | C     | 57   |
| A     | 61   | ASN  | B     | 58   | PHE  | C     | 58   |
| A     | 63   | THR  | B     | 59   | PHE  | C     | 59   |
| A     | 64   | TRP  | B     | 60   | SER  | C     | 60   |
| A     | 65   | PHE  | B     | 61   | ASN  | C     | 61   |
| A     | 66   | HIS  | B     | 63   | THR  | C     | 63   |
| A     | 79   | PHE  | B     | 64   | TRP  | C     | 64   |
| A     | 80   | ASP  | B     | 65   | PHE  | C     | 65   |
| A     | 81   | ASN  | B     | 66   | HIS  | C     | 66   |
| A     | 82   | PRO  | B     | 81   | ASN  | C     | 80   |
| A     | 83   | VAL  | B     | 82   | PRO  | C     | 81   |
| A     | 84   | LEU  | B     | 83   | VAL  | C     | 82   |
| A     | 85   | PRO  | B     | 84   | LEU  | C     | 83   |
| A     | 87   | ASN  | B     | 85   | PRO  | C     | 84   |
| A     | 88   | ASP  | B     | 87   | ASN  | C     | 85   |
| A     | 92   | PHE  | B     | 88   | ASP  | C     | 86   |
| A     | 94   | SER  | B     | 91   | TYR  | C     | 87   |
| A     | 95   | THR  | B     | 92   | PHE  | C     | 88   |
| A     | 99   | ASN  | B     | 94   | SER  | C     | 91   |
| A     | 100  | ILE  | B     | 95   | THR  | C     | 93   |
| A     | 101  | ILE  | B     | 96   | GLU  | C     | 94   |
| A     | 102  | ARG  | B     | 97   | LYS  | C     | 95   |
| A     | 104  | TRP  | B     | 98   | SER  | C     | 99   |
| A     | 105  | ILE  | B     | 99   | ASN  | C     | 100  |
| A     | 108  | THR  | B     | 100  | ILE  | C     | 101  |
| A     | 109  | THR  | B     | 101  | ILE  | C     | 102  |
| A     | 110  | LEU  | B     | 102  | ARG  | C     | 103  |
| A     | 111  | ASP  | B     | 104  | TRP  | C     | 104  |
| A     | 112  | SER  | B     | 105  | ILE  | C     | 105  |
| A     | 113  | LYS  | B     | 108  | THR  | C     | 108  |
| A     | 114  | THR  | B     | 109  | THR  | C     | 109  |
| A     | 115  | GLN  | B     | 110  | LEU  | C     | 110  |
| A     | 118  | LEU  | B     | 111  | ASP  | C     | 111  |
| A     | 120  | VAL  | B     | 112  | SER  | C     | 112  |
| A     | 121  | ASN  | B     | 113  | LYS  | C     | 113  |
| A     | 122  | ASN  | B     | 114  | THR  | C     | 114  |
| A     | 123  | ALA  | B     | 115  | GLN  | C     | 115  |
| A     | 124  | THR  | B     | 118  | LEU  | C     | 116  |
| A     | 125  | ASN  | B     | 119  | ILE  | C     | 118  |
| A     | 126  | VAL  | B     | 120  | VAL  | C     | 119  |
| A     | 127  | VAL  | B     | 121  | ASN  | C     | 120  |
| A     | 128  | ILE  | B     | 122  | ASN  | C     | 121  |
| A     | 129  | LYS  | B     | 123  | ALA  | C     | 122  |
| A     | 130  | VAL  | B     | 124  | THR  | C     | 123  |
| A     | 132  | GLU  | B     | 125  | ASN  | C     | 124  |
| A     | 133  | PHE  | B     | 126  | VAL  | C     | 125  |
| A     | 134  | GLN  | B     | 127  | VAL  | C     | 126  |
| A     | 135  | PHE  | B     | 128  | ILE  | C     | 127  |
| A     | 136  | CYS  | B     | 129  | LYS  | C     | 128  |
| A     | 137  | ASN  | B     | 130  | VAL  | C     | 129  |
| A     | 138  | ASP  | B     | 131  | CYS  | C     | 130  |
| A     | 139  | PRO  | B     | 132  | GLU  | C     | 131  |
| A     | 140  | PHE  | B     | 133  | PHE  | C     | 132  |
| A     | 141  | LEU  | B     | 134  | GLN  | C     | 133  |
| A     | 142  | GLY  | B     | 135  | PHE  | C     | 134  |
| A     | 156  | GLU  | B     | 136  | CYS  | C     | 135  |
| A     | 157  | PHE  | B     | 137  | ASN  | C     | 136  |
| A     | 158  | ARG  | B     | 138  | ASP  | C     | 137  |
| A     | 159  | VAL  | B     | 139  | PRO  | C     | 138  |

| 7LWV  |      |      |       |      |      |       |      |
|-------|------|------|-------|------|------|-------|------|
| chain | resi | resn | chain | resi | resn | chain | resi |
| A     | 27   | ALA  | B     | 27   | ALA  | C     | 27   |
| A     | 28   | TYR  | B     | 28   | TYR  | C     | 28   |
| A     | 29   | THR  | B     | 29   | THR  | C     | 30   |
| A     | 30   | ASN  | B     | 30   | ASN  | C     | 32   |
| A     | 32   | PHE  | B     | 32   | PHE  | C     | 33   |
| A     | 33   | THR  | B     | 33   | THR  | C     | 34   |
| A     | 38   | TYR  | B     | 34   | ARG  | C     | 39   |
| A     | 39   | PRO  | B     | 39   | PRO  | C     | 40   |
| A     | 40   | ASP  | B     | 40   | ASP  | C     | 41   |
| A     | 41   | LYS  | B     | 44   | ARG  | C     | 42   |
| A     | 42   | VAL  | B     | 46   | SER  | C     | 44   |
| A     | 44   | ARG  | B     | 47   | VAL  | C     | 45   |
| A     | 45   | SER  | B     | 48   | LEU  | C     | 46   |
| A     | 46   | SER  | B     | 49   | HIS  | C     | 47   |
| A     | 47   | VAL  | B     | 50   | SER  | C     | 48   |
| A     | 48   | LEU  | B     | 51   | THR  | C     | 49   |
| A     | 49   | HIS  | B     | 52   | GLN  | C     | 50   |
| A     | 50   | SER  | B     | 53   | ASP  | C     | 51   |
| A     | 51   | THR  | B     | 54   | LEU  | C     | 52   |
| A     | 52   | GLN  | B     | 56   | LEU  | C     | 53   |
| A     | 53   | ASP  | B     | 57   | PRO  | C     | 54   |
| A     | 54   | LEU  | B     | 58   | PHE  | C     | 57   |
| A     | 57   | PRO  | B     | 59   | PHE  | C     | 58   |
| A     | 58   | PHE  | B     | 60   | SER  | C     | 59   |
| A     | 59   | PHE  | B     | 61   | ASN  | C     | 60   |
| A     | 60   | SER  | B     | 63   | THR  | C     | 61   |
| A     | 61   | ASN  | B     | 64   | TRP  | C     | 63   |
| A     | 63   | THR  | B     | 65   | PHE  | C     | 64   |
| A     | 64   | TRP  | B     | 66   | HIS  | C     | 65   |
| A     | 65   | PHE  | B     | 81   | ASN  | C     | 66   |
| A     | 66   | HIS  | B     | 82   | PRO  | C     | 80   |
| A     | 79   | PHE  | B     | 83   | VAL  | C     | 81   |
| A     | 80   | ASP  | B     | 84   | LEU  | C     | 82   |
| A     | 82   | PRO  | B     | 85   | PRO  | C     | 83   |
| A     | 83   | VAL  | B     | 87   | ASN  | C     | 84   |
| A     | 84   | LEU  | B     | 88   | ASP  | C     | 85   |
| A     | 85   | PRO  | B     | 95   | THR  | C     | 87   |
| A     | 87   | ASN  | B     | 97   | LYS  | C     | 88   |
| A     | 88   | ASP  | B     | 98   | SER  | C     | 94   |
| A     | 99   | ASN  | B     | 99   | ASN  | C     | 99   |
| A     | 100  | ILE  | B     | 100  | ILE  | C     | 100  |
| A     | 101  | ILE  | B     | 101  | ILE  | C     | 101  |
| A     | 102  | ARG  | B     | 102  | ARG  | C     | 104  |
| A     | 104  | TRP  | B     | 108  | THR  | C     | 105  |
| A     | 108  | THR  | B     | 109  | THR  | C     | 108  |
| A     | 109  | THR  | B     | 111  | ASP  | C     | 109  |
| A     | 110  | LEU  | B     | 112  | SER  | C     | 110  |
| A     | 111  | ASP  | B     | 113  | LYS  | C     | 111  |
| A     | 112  | SER  | B     | 114  | THR  | C     | 112  |
| A     | 113  | LYS  | B     | 115  | GLN  | C     | 113  |
| A     | 114  | THR  | B     | 118  | LEU  | C     | 114  |
| A     | 115  | GLN  | B     | 120  | VAL  | C     | 115  |
| A     | 120  | VAL  | B     | 122  | ASN  | C     | 118  |
| A     | 121  | ASN  | B     | 123  | ALA  | C     | 120  |
| A     | 122  | ASN  | B     | 124  | THR  | C     | 121  |
| A     | 123  | ALA  | B     | 125  | ASN  | C     | 122  |
| A     | 124  | THR  | B     | 127  | VAL  | C     | 123  |
| A     | 125  | ASN  | B     | 129  | LYS  | C     | 124  |
| A     | 126  | VAL  | B     | 132  | GLU  | C     | 125  |
| A     | 127  | VAL  | B     | 133  | PHE  | C     | 127  |
| A     | 129  | LYS  | B     | 134  | GLN  | C     | 130  |
| A     | 130  | VAL  | B     | 135  | PHE  | C     | 132  |
| A     | 132  | GLU  | B     | 136  | CYS  | C     | 133  |
| A     | 134  | GLN  | B     | 137  | ASN  | C     | 134  |
| A     | 135  | PHE  | B     | 138  | ASP  | C     | 135  |
| A     | 136  | CYS  | B     | 140  | PHE  | C     | 136  |
| A     | 137  | ASN  | B     | 141  | LEU  | C     | 137  |
| A     | 138  | ASP  | B     | 155  | SER  | C     | 138  |
| A     | 140  | PHE  | B     | 156  | GLU  | C     | 139  |
| A     | 141  | LEU  | B     | 157  | PHE  | C     | 140  |
| A     | 142  | GLY  | B     | 158  | ARG  | C     | 157  |
| A     | 156  | GLU  | B     | 160  | TYR  | C     | 158  |
| A     | 157  | PHE  | B     | 161  | SER  | C     | 159  |
| A     | 158  | ARG  | B     | 162  | SER  | C     | 160  |
| A     | 159  | VAL  | B     | 164  | ASN  | C     | 161  |
| A     | 160  | TYR  | B     | 165  | ASN  | C     | 162  |
| A     | 161  | SER  | B     | 166  | CYS  | C     | 163  |
| A     | 162  | SER  | B     | 167  | THR  | C     | 164  |
| A     | 163  | ALA  | B     | 168  | PHE  | C     | 165  |
| A     | 164  | ASN  | B     | 169  | GLU  | C     | 166  |
| A     | 165  | ASN  | B     | 170  | TYR  | C     | 167  |
| A     | 166  | CYS  | B     | 171  | VAL  | C     | 168  |
| A     | 167  | THR  | B     | 172  | SER  | C     | 169  |
| A     | 168  | PHE  | B     | 173  | GLN  | C     | 170  |
| A     | 169  | GLU  | B     | 174  | PRO  | C     | 171  |

| 7LYQ  |      |      |       |      |      |       |      |
|-------|------|------|-------|------|------|-------|------|
| chain | resi | resn | chain | resi | resn | chain | resi |
| A     | 27   | ALA  | B     | 27   | ALA  | C     | 27   |
| A     | 28   | TYR  | B     | 28   | TYR  | C     | 28   |
| A     | 29   | THR  | B     | 29   | THR  | C     | 30   |
| A     | 30   | ASN  | B     | 30   | ASN  | C     | 32   |
| A     | 32   | PHE  | B     | 32   | PHE  | C     | 33   |
| A     | 33   | THR  | B     | 33   | THR  | C     | 34   |
| A     | 38   | TYR  | B     | 34   | ARG  | C     | 39   |
| A     | 39   | PRO  | B     | 39   | PRO  | C     | 40   |
| A     | 40   | ASP  | B     | 40   | ASP  | C     | 41   |
| A     | 41   | LYS  | B     | 46   | SER  | C     | 42   |
| A     | 44   | ARG  | B     | 47   | VAL  | C     | 44   |
| A     | 45   | SER  | B     | 48   | LEU  | C     | 45   |
| A     | 46   | SER  | B     | 49   | HIS  | C     | 46   |
| A     | 47   | VAL  | B     | 50   | SER  | C     | 47   |
| A     | 48   | LEU  | B     | 51   | THR  | C     | 48   |
| A     | 49   | HIS  | B     | 52   | GLN  | C     | 49   |
| A     | 50   | SER  | B     | 53   | ASP  | C     | 50   |
| A     | 51   | THR  | B     | 54   | LEU  | C     | 51   |
| A     | 52   | GLN  | B     | 57   | PRO  | C     | 52   |
| A     | 53   | ASP  | B     | 58   | PHE  | C     | 53   |
| A     | 54   | LEU  | B     | 59   | PHE  | C     | 54   |
| A     | 57   | PRO  | B     | 60   | SER  | C     | 57   |
| A     | 58   | PHE  | B     | 61   | ASN  | C     | 58   |
| A     | 59   | PHE  | B     | 63   | THR  | C     | 59   |
| A     | 60   | SER  | B     | 64   | TRP  | C     | 60   |
| A     | 61   | ASN  | B     | 65   | PHE  | C     | 61   |
| A     | 63   | THR  | B     | 66   | HIS  | C     | 63   |
| A     | 64   | TRP  | B     | 81   | ASN  | C     | 64   |
| A     | 65   | PHE  | B     | 82   | PRO  | C     | 65   |
| A     | 66   | HIS  | B     | 83   | VAL  | C     | 66   |
| A     | 79   | PHE  | B     | 84   | LEU  | C     | 80   |
| A     | 80   | ASP  | B     | 85   | PRO  | C     | 81   |
| A     | 82   | PRO  | B     | 87   | ASN  | C     | 82   |
| A     | 83   | VAL  | B     | 88   | ASP  | C     | 83   |
| A     | 84   | LEU  | B     | 97   | LYS  | C     | 84   |
| A     | 85   | PRO  | B     | 98   | SER  | C     | 85   |
| A     | 87   | ASN  | B     | 99   | ASN  | C     | 87   |
| A     | 88   | ASP  | B     | 100  | ILE  | C     | 88   |
| A     | 99   | ASN  | B     | 108  | THR  | C     | 94   |
| A     | 100  | ILE  | B     | 109  | THR  | C     | 99   |
| A     | 102  | ARG  | B     | 111  | ASP  | C     | 100  |
| A     | 108  | THR  | B     | 112  | SER  | C     | 101  |
| A     | 109  | THR  | B     | 113  | LYS  | C     | 104  |
| A     | 111  | ASP  | B     | 114  | THR  | C     | 105  |
| A     | 112  | SER  | B     | 115  | GLN  | C     | 108  |
| A     | 113  | LYS  | B     | 122  | ASN  | C     | 109  |

|   |     |     |   |     |     |   |     |     |   |     |     |   |     |     |   |     |     |   |     |     |   |     |     |   |     |     |
|---|-----|-----|---|-----|-----|---|-----|-----|---|-----|-----|---|-----|-----|---|-----|-----|---|-----|-----|---|-----|-----|---|-----|-----|
| A | 160 | TYR | B | 140 | PHE | C | 139 | PRO | A | 170 | TYR | B | 175 | PHE | C | 172 | SER | A | 187 | LYS | B | 206 | LYS | C | 176 | LEU |
| A | 161 | SER | B | 141 | LEU | C | 140 | PHE | A | 171 | VAL | B | 176 | LEU | C | 173 | GLN | A | 188 | ASN | B | 207 | HIS | C | 187 | LYS |
| A | 162 | SER | B | 155 | SER | C | 157 | PHE | A | 172 | SER | B | 187 | LYS | C | 174 | PRO | A | 195 | LYS | B | 208 | THR | C | 188 | ASN |
| A | 163 | ALA | B | 156 | GLU | C | 158 | ARG | A | 173 | GLN | B | 190 | ARG | C | 175 | PHE | A | 196 | ASN | B | 209 | PRO | C | 192 | PHE |
| A | 164 | ASN | B | 157 | PHE | C | 159 | VAL | A | 174 | PRO | B | 196 | ASN | C | 176 | LEU | A | 197 | ILE | B | 217 | PRO | C | 196 | ASN |
| A | 165 | ASN | B | 158 | ARG | C | 160 | TYR | A | 175 | PHE | B | 197 | ILE | C | 187 | LYS | A | 198 | ASP | B | 218 | GLN | C | 198 | ASP |
| A | 166 | CYS | B | 159 | VAL | C | 161 | SER | A | 176 | LEU | B | 198 | ASP | C | 188 | ASN | A | 199 | GLY | B | 219 | GLY | C | 200 | TYR |
| A | 167 | THR | B | 160 | TYR | C | 162 | SER | A | 187 | LYS | B | 199 | GLY | C | 192 | PHE | A | 200 | TYR | B | 220 | PHE | C | 202 | LYS |
| A | 168 | PHE | B | 161 | SER | C | 163 | ALA | A | 188 | ASN | B | 202 | LYS | C | 196 | ASN | A | 202 | LYS | B | 221 | SER | C | 204 | TYR |
| A | 169 | GLU | B | 162 | SER | C | 164 | ASN | A | 190 | ARG | B | 204 | TYR | C | 198 | ASP | A | 206 | LYS | B | 222 | ALA | C | 206 | LYS |
| A | 170 | TYR | B | 163 | ALA | C | 165 | ASN | A | 192 | PHE | B | 205 | SER | C | 200 | TYR | A | 207 | HIS | B | 224 | GLU | C | 207 | HIS |
| A | 171 | VAL | B | 164 | ASN | C | 166 | CYS | A | 195 | LYS | B | 206 | LYS | C | 202 | LYS | A | 208 | THR | B | 225 | PRO | C | 208 | THR |
| A | 172 | SER | B | 165 | ASN | C | 167 | THR | A | 196 | ASN | B | 207 | HIS | C | 204 | TYR | A | 209 | PRO | B | 226 | LEU | C | 209 | PRO |
| A | 173 | GLN | B | 166 | CYS | C | 168 | PHE | A | 197 | ILE | B | 208 | THR | C | 206 | LYS | A | 210 | ILE | B | 227 | VAL | C | 211 | ASN |
| A | 174 | PRO | B | 167 | THR | C | 169 | GLU | A | 198 | ASP | B | 209 | PRO | C | 207 | HIS | A | 211 | ASN | B | 228 | ASP | C | 212 | LEU |
| A | 175 | PHE | B | 168 | PHE | C | 170 | TYR | A | 199 | GLY | B | 217 | PRO | C | 208 | THR | A | 212 | LEU | B | 230 | PRO | C | 214 | ARG |
| A | 176 | LEU | B | 169 | GLU | C | 171 | VAL | A | 200 | TYR | B | 218 | GLN | C | 209 | PRO | A | 213 | VAL | B | 231 | ILE | C | 215 | ASP |
| A | 187 | LYS | B | 170 | TYR | C | 172 | SER | A | 202 | LYS | B | 219 | GLY | C | 210 | ILE | A | 214 | ARG | B | 233 | ILE | C | 217 | PRO |
| A | 188 | ASN | B | 171 | VAL | C | 173 | GLN | A | 206 | LYS | B | 220 | PHE | C | 211 | ASN | A | 217 | PRO | B | 234 | ASN | C | 218 | GLN |
| A | 189 | LEU | B | 172 | SER | C | 174 | PRO | A | 207 | HIS | B | 221 | SER | C | 212 | LEU | A | 218 | GLN | B | 235 | ILE | C | 219 | GLY |
| A | 190 | ARG | B | 173 | GLN | C | 175 | PHE | A | 208 | THR | B | 222 | ALA | C | 213 | VAL | A | 219 | GLY | B | 236 | THR | C | 220 | PHE |
| A | 192 | PHE | B | 174 | PRO | C | 176 | LEU | A | 209 | PRO | B | 224 | GLU | C | 214 | ARG | A | 220 | PHE | B | 237 | ARG | C | 221 | SER |
| A | 195 | LYS | B | 175 | PHE | C | 187 | LYS | A | 210 | ILE | B | 225 | PRO | C | 215 | ASP | A | 221 | SER | B | 239 | GLN | C | 224 | GLU |
| A | 196 | ASN | B | 176 | LEU | C | 188 | ASN | A | 211 | ASN | B | 226 | LEU | C | 217 | PRO | A | 224 | GLU | B | 242 | LEU | C | 225 | PRO |
| A | 197 | ILE | B | 187 | LYS | C | 189 | LEU | A | 212 | LEU | B | 227 | VAL | C | 218 | GLN | A | 225 | PRO | B | 263 | ALA | C | 226 | LEU |
| A | 198 | ASP | B | 188 | ASN | C | 190 | ARG | A | 213 | VAL | B | 228 | ASP | C | 219 | GLY | A | 226 | LEU | B | 264 | ALA | C | 227 | VAL |
| A | 199 | GLY | B | 189 | LEU | C | 192 | PHE | A | 214 | ARG | B | 230 | PRO | C | 220 | PHE | A | 227 | VAL | B | 269 | TYR | C | 228 | ASP |
| A | 200 | TYR | B | 190 | ARG | C | 194 | PHE | A | 217 | PRO | B | 231 | ILE | C | 221 | SER | A | 228 | ASP | B | 270 | LEU | C | 229 | LEU |
| A | 202 | LYS | B | 192 | PHE | C | 195 | LYS | A | 218 | GLN | B | 232 | GLY | C | 224 | GLU | A | 231 | ILE | B | 271 | GLN | C | 230 | PRO |
| A | 203 | ILE | B | 194 | PHE | C | 196 | ASN | A | 219 | GLY | B | 233 | ILE | C | 225 | PRO | A | 233 | ILE | B | 272 | PRO | C | 231 | ILE |
| A | 204 | TYR | B | 195 | LYS | C | 197 | ILE | A | 220 | PHE | B | 234 | ASN | C | 226 | LEU | A | 234 | ASN | B | 273 | ARG | C | 232 | GLY |
| A | 205 | SER | B | 196 | ASN | C | 198 | ASP | A | 221 | SER | B | 235 | ILE | C | 227 | VAL | A | 235 | ILE | B | 274 | THR | C | 233 | ILE |
| A | 206 | LYS | B | 197 | ILE | C | 199 | GLY | A | 224 | GLU | B | 236 | THR | C | 228 | ASP | A | 236 | THR | B | 278 | LYS | C | 234 | ASN |
| A | 207 | HIS | B | 198 | ASP | C | 200 | TYR | A | 225 | PRO | B | 237 | ARG | C | 229 | LEU | A | 237 | ARG | B | 280 | ASN | C | 235 | ILE |
| A | 208 | THR | B | 199 | GLY | C | 201 | PHE | A | 226 | LEU | B | 239 | GLN | C | 230 | PRO | A | 239 | GLN | B | 281 | GLU | C | 236 | THR |
| A | 209 | PRO | B | 200 | TYR | C | 202 | LYS | A | 227 | VAL | B | 242 | LEU | C | 231 | ILE | A | 243 | ALA | B | 282 | ASN | C | 241 | LEU |
| A | 210 | ILE | B | 201 | PHE | C | 203 | ILE | A | 228 | ASP | B | 263 | ALA | C | 232 | GLY | A | 244 | LEU | B | 284 | THR | C | 242 | LEU |
| A | 211 | ASN | B | 202 | LYS | C | 204 | TYR | A | 230 | PRO | B | 264 | ALA | C | 233 | ILE | A | 245 | HIS | B | 286 | THR | C | 244 | LEU |
| A | 212 | LEU | B | 203 | ILE | C | 205 | SER | A | 231 | ILE | B | 266 | TYR | C | 234 | ASN | A | 246 | ARG | B | 287 | ASP | C | 245 | HIS |
| A | 213 | VAL | B | 204 | TYR | C | 206 | LYS | A | 234 | ASN | B | 267 | VAL | C | 235 | ILE | A | 261 | GLY | B | 288 | ALA | C | 261 | GLY |
| A | 214 | ARG | B | 205 | SER | C | 207 | HIS | A | 235 | ILE | B | 268 | GLY | C | 236 | THR | A | 262 | ALA | B | 291 | CYS | C | 262 | ALA |
| A | 215 | ASP | B | 206 | LYS | C | 208 | THR | A | 236 | THR | B | 269 | TYR | C | 241 | LEU | A | 263 | ALA | B | 292 | ALA | C | 263 | ALA |
| A | 216 | LEU | B | 207 | HIS | C | 209 | PRO | A | 237 | ARG | B | 270 | LEU | C | 242 | LEU | A | 269 | TYR | B | 293 | LEU | C | 265 | TYR |
| A | 217 | PRO | B | 208 | THR | C | 210 | ILE | A | 239 | GLN | B | 271 | GLN | C | 243 | ALA | A | 271 | GLN | B | 294 | ASP | C | 269 | TYR |
| A | 218 | GLN | B | 209 | PRO | C | 211 | ASN | A | 242 | LEU | B | 272 | PRO | C | 244 | LEU | A | 272 | PRO | B | 295 | PRO | C | 270 | LEU |
| A | 219 | GLY | B | 217 | PRO | C | 212 | LEU | A | 243 | ALA | B | 273 | ARG | C | 245 | HIS | A | 273 | ARG | B | 296 | LEU | C | 271 | GLN |
| A | 220 | PHE | B | 218 | GLN | C | 213 | VAL | A | 244 | LEU | B | 274 | THR | C | 261 | GLY | A | 274 | THR | B | 298 | GLU | C | 272 | PRO |
| A | 221 | SER | B | 219 | GLY | C | 214 | ARG | A | 245 | HIS | B | 278 | LYS | C | 262 | ALA | A | 278 | LYS | B | 300 | LYS | C | 273 | ARG |
| A | 222 | ALA | B | 220 | PHE | C | 215 | ASP | A | 246 | ARG | B | 280 | ASN | C | 263 | ALA | A | 280 | ASN | B | 302 | THR | C | 274 | THR |
| A | 224 | GLU | B | 221 | SER | C | 216 | LEU | A | 261 | GLY | B | 281 | GLU | C | 265 | TYR | A | 281 | GLU | B | 303 | LEU | C | 278 | LYS |
| A | 225 | PRO | B | 222 | ALA | C | 217 | PRO | A | 262 | ALA | B | 282 | ASN | C | 269 | TYR | A | 282 | ASN | B | 304 | LYS | C | 280 | ASN |
| A | 226 | LEU | B | 224 | GLU | C | 218 | GLN | A | 263 | ALA | B | 284 | THR | C | 270 | LEU | A | 284 | THR | B | 305 | SER | C | 281 | GLU |
| A | 227 | VAL | B | 225 | PRO | C | 219 | GLY | A | 269 | TYR | B | 286 | THR | C | 271 | GLN | A | 286 | THR | B | 306 | PHE | C | 282 | ASN |
| A | 228 | ASP | B | 226 | LEU | C | 220 | PHE | A | 270 | LEU | B | 287 | ASP | C | 272 | PRO | A | 287 | ASP | B | 307 | THR | C | 284 | THR |
| A | 230 | PRO | B | 227 | VAL | C | 221 | SER | A | 271 | GLN | B | 288 | ALA | C | 273 | ARG | A | 288 | ALA | B | 309 | GLU | C | 285 | ILE |
| A | 231 | ILE | B | 228 | ASP | C | 222 | ALA | A | 272 | PRO | B | 291 | CYS | C | 274 | THR | A | 291 | CYS | B | 310 | LYS | C | 286 | THR |
| A | 232 | GLY | B | 229 | LEU | C | 223 | LEU | A | 273 | ARG | B | 292 | ALA | C | 278 | LYS | A | 292 | ALA | B | 311 | GLY | C | 287 | ASP |
| A | 233 | ILE | B | 230 | PRO | C | 224 | GLU | A | 274 | THR | B | 293 | LEU | C | 280 | ASN | A | 293 | LEU | B | 312 | ILE | C | 288 | ALA |
| A | 234 | ASN | B | 231 | ILE | C | 225 | PRO | A | 278 | LYS | B | 294 | ASP | C | 281 | GLU | A | 294 | ASP | B | 313 | TYR | C | 289 | VAL |
| A | 235 | ILE | B | 232 | GLY | C | 226 | LEU | A | 280 | ASN | B | 295 | PRO | C | 282 | ASN | A | 295 | PRO | B | 314 | GLN | C | 291 | CYS |
| A | 236 | THR | B | 233 | ILE | C | 227 | VAL | A | 281 | GLU | B | 296 | LEU | C | 284 | THR | A | 297 | SER | B | 315 | THR | C | 292 | ALA |
| A | 237 | ARG | B | 234 | ASN | C | 228 | ASP | A | 282 | ASN | B | 297 | SER | C | 285 | ILE | A | 298 | GLU | B | 316 | SER | C | 293 | LEU |
| A | 239 | GLN | B | 235 | ILE | C | 230 | PRO | A | 284 | THR | B | 298 | GLU | C | 286 | THR | A | 300 | LYS | B | 317 | ASN | C | 294 | ASP |
| A | 242 | LEU | B | 236 | THR | C | 231 | ILE | A | 286 | THR | B | 300 | LYS | C | 287 | ASP | A | 302 | THR | B | 318 | PHE | C | 295 | PRO |
| A | 243 | ALA | B | 237 | ARG | C | 232 | GLY | A | 287 | ASP | B | 301 | CYS | C | 288 | ALA | A | 303 | LEU | B | 319 | ARG | C | 296 | LEU |
| A | 244 | LEU | B | 239 | GLN | C | 233 | ILE | A | 288 | ALA | B | 302 | THR | C | 289 | VAL | A | 304 | LYS | B | 320 | VAL | C | 297 | SER |
| A | 245 | HIS | B | 240 | THR | C | 234 | ASN | A | 291 | CYS | B | 303 | LEU | C | 291 | CYS | A | 305 | SER | B | 321 | GLN | C | 298 | GLU |
| A | 246 | ARG | B | 241 | LEU | C | 235 | ILE | A | 292 | ALA | B | 304 | LYS | C | 292 | ALA | A | 306 | PHE | B | 322 | PRO | C | 300 | LYS |
| A | 261 | GLY | B | 242 | LEU | C | 236 | THR | A | 293 | LEU | B | 305 | SER | C | 293 | LEU | A | 307 | THR | B | 323 | THR | C | 301 | CYS |
| A | 262 | ALA | B | 263 | ALA | C | 237 | ARG | A |     |     |   |     |     |   |     |     |   |     |     |   |     |     |   |     |     |

|   |     |     |   |     |     |   |     |     |   |     |     |   |     |     |   |     |     |   |     |     |   |     |     |   |     |     |
|---|-----|-----|---|-----|-----|---|-----|-----|---|-----|-----|---|-----|-----|---|-----|-----|---|-----|-----|---|-----|-----|---|-----|-----|
| A | 287 | ASP | B | 288 | ALA | C | 274 | THR | A | 318 | PHE | B | 330 | PRO | C | 317 | ASN | A | 337 | PRO | B | 348 | ALA | C | 323 | THR |
| A | 288 | ALA | B | 289 | VAL | C | 275 | PHE | A | 319 | ARG | B | 331 | ASN | C | 318 | PHE | A | 338 | PHE | B | 349 | SER | C | 324 | GLU |
| A | 289 | VAL | B | 290 | ASP | C | 278 | LYS | A | 320 | VAL | B | 332 | ILE | C | 319 | ARG | A | 339 | GLY | B | 351 | TYR | C | 325 | SER |
| A | 291 | CYS | B | 291 | CYS | C | 279 | TYR | A | 321 | GLN | B | 333 | THR | C | 320 | VAL | A | 340 | GLU | B | 352 | ALA | C | 327 | VAL |
| A | 292 | ALA | B | 292 | ALA | C | 280 | ASN | A | 322 | PRO | B | 334 | ASN | C | 321 | GLN | A | 341 | VAL | B | 353 | TRP | C | 330 | PRO |
| A | 293 | LEU | B | 293 | LEU | C | 281 | GLU | A | 323 | THR | B | 335 | LEU | C | 322 | PRO | A | 342 | PHE | B | 354 | ASN | C | 331 | ASN |
| A | 294 | ASP | B | 294 | ASP | C | 282 | ASN | A | 324 | GLU | B | 336 | CYS | C | 323 | THR | A | 343 | ASN | B | 355 | ARG | C | 332 | ILE |
| A | 295 | PRO | B | 295 | PRO | C | 284 | THR | A | 325 | SER | B | 337 | PRO | C | 324 | GLU | A | 344 | ALA | B | 356 | LYS | C | 333 | THR |
| A | 296 | LEU | B | 296 | LEU | C | 285 | ILE | A | 327 | VAL | B | 339 | GLY | C | 325 | SER | A | 345 | THR | B | 357 | ARG | C | 334 | ASN |
| A | 297 | SER | B | 297 | SER | C | 286 | THR | A | 328 | ARG | B | 340 | GLU | C | 327 | VAL | A | 346 | ARG | B | 359 | SER | C | 335 | LEU |
| A | 298 | GLU | B | 298 | GLU | C | 287 | ASP | A | 335 | LEU | B | 341 | VAL | C | 330 | PRO | A | 347 | PHE | B | 360 | ASN | C | 336 | CYS |
| A | 300 | LYS | B | 300 | LYS | C | 288 | ALA | A | 336 | CYS | B | 342 | PHE | C | 331 | ASN | A | 348 | ALA | B | 361 | CYS | C | 337 | PRO |
| A | 301 | CYS | B | 301 | CYS | C | 289 | VAL | A | 337 | PRO | B | 343 | ASN | C | 332 | ILE | A | 349 | SER | B | 364 | ASP | C | 339 | GLY |
| A | 302 | THR | B | 302 | THR | C | 290 | ASP | A | 338 | PHE | B | 344 | ALA | C | 333 | THR | A | 351 | TYR | B | 366 | SER | C | 340 | GLU |
| A | 303 | LEU | B | 303 | LEU | C | 291 | CYS | A | 339 | GLY | B | 345 | THR | C | 334 | ASN | A | 352 | ALA | B | 367 | VAL | C | 341 | VAL |
| A | 304 | LYS | B | 304 | LYS | C | 292 | ALA | A | 340 | GLU | B | 346 | ARG | C | 335 | LEU | A | 353 | TRP | B | 369 | TYR | C | 342 | PHE |
| A | 305 | SER | B | 305 | SER | C | 293 | LEU | A | 341 | VAL | B | 347 | PHE | C | 336 | CYS | A | 354 | ASN | B | 370 | ASN | C | 343 | ASN |
| A | 306 | PHE | B | 306 | PHE | C | 294 | ASP | A | 342 | PHE | B | 348 | ALA | C | 337 | PRO | A | 355 | ARG | B | 371 | SER | C | 344 | ALA |
| A | 307 | THR | B | 307 | THR | C | 295 | PRO | A | 343 | ASN | B | 349 | SER | C | 339 | GLY | A | 356 | LYS | B | 372 | ALA | C | 345 | THR |
| A | 308 | VAL | B | 309 | GLU | C | 296 | LEU | A | 344 | ALA | B | 351 | TYR | C | 340 | GLU | A | 357 | ARG | B | 373 | SER | C | 346 | ARG |
| A | 309 | GLU | B | 310 | LYS | C | 297 | SER | A | 345 | THR | B | 352 | ALA | C | 341 | VAL | A | 358 | ILE | B | 374 | PHE | C | 347 | PHE |
| A | 310 | LYS | B | 311 | GLY | C | 298 | GLU | A | 346 | ARG | B | 353 | TRP | C | 342 | PHE | A | 359 | SER | B | 375 | SER | C | 349 | SER |
| A | 311 | GLY | B | 312 | ILE | C | 300 | LYS | A | 347 | PHE | B | 354 | ASN | C | 343 | ASN | A | 360 | ASN | B | 376 | THR | C | 352 | ALA |
| A | 312 | ILE | B | 313 | TYR | C | 301 | CYS | A | 348 | ALA | B | 355 | ARG | C | 344 | ALA | A | 362 | VAL | B | 377 | PHE | C | 354 | ASN |
| A | 313 | TYR | B | 314 | GLN | C | 302 | THR | A | 349 | SER | B | 356 | LYS | C | 345 | THR | A | 366 | SER | B | 378 | LYS | C | 355 | ARG |
| A | 314 | GLN | B | 315 | THR | C | 303 | LEU | A | 351 | TYR | B | 357 | ARG | C | 346 | ARG | A | 367 | VAL | B | 379 | CYS | C | 356 | LYS |
| A | 315 | THR | B | 316 | SER | C | 304 | LYS | A | 352 | ALA | B | 358 | ILE | C | 347 | PHE | A | 368 | LEU | B | 380 | TYR | C | 357 | ARG |
| A | 316 | SER | B | 317 | ASN | C | 305 | SER | A | 353 | TRP | B | 359 | SER | C | 349 | SER | A | 369 | TYR | B | 381 | GLY | C | 359 | SER |
| A | 317 | ASN | B | 318 | PHE | C | 306 | PHE | A | 354 | ASN | B | 360 | ASN | C | 352 | ALA | A | 370 | ASN | B | 382 | VAL | C | 360 | ASN |
| A | 318 | PHE | B | 319 | ARG | C | 307 | THR | A | 355 | ARG | B | 361 | CYS | C | 354 | ASN | A | 371 | SER | B | 383 | SER | C | 362 | VAL |
| A | 319 | ARG | B | 320 | VAL | C | 309 | GLU | A | 356 | LYS | B | 364 | ASP | C | 355 | ARG | A | 372 | ALA | B | 384 | PRO | C | 364 | ASP |
| A | 320 | VAL | B | 321 | GLN | C | 310 | LYS | A | 357 | ARG | B | 366 | SER | C | 356 | LYS | A | 373 | SER | B | 385 | THR | C | 366 | SER |
| A | 321 | GLN | B | 322 | PRO | C | 311 | GLY | A | 358 | ILE | B | 367 | VAL | C | 357 | ARG | A | 374 | PHE | B | 386 | LYS | C | 367 | VAL |
| A | 322 | PRO | B | 323 | THR | C | 312 | ILE | A | 359 | SER | B | 369 | TYR | C | 359 | SER | A | 375 | SER | B | 388 | ASN | C | 369 | TYR |
| A | 323 | THR | B | 324 | GLU | C | 313 | TYR | A | 360 | ASN | B | 370 | ASN | C | 360 | ASN | A | 376 | THR | B | 389 | ASP | C | 370 | ASN |
| A | 324 | GLU | B | 325 | SER | C | 314 | GLN | A | 362 | VAL | B | 371 | SER | C | 362 | VAL | A | 377 | PHE | B | 390 | LEU | C | 371 | SER |
| A | 325 | SER | B | 327 | VAL | C | 315 | THR | A | 366 | SER | B | 372 | ALA | C | 364 | ASP | A | 378 | LYS | B | 391 | CYS | C | 372 | ALA |
| A | 326 | ILE | B | 328 | ARG | C | 316 | SER | A | 367 | VAL | B | 373 | SER | C | 366 | SER | A | 379 | CYS | B | 392 | PHE | C | 373 | SER |
| A | 327 | VAL | B | 329 | PHE | C | 317 | ASN | A | 368 | LEU | B | 374 | PHE | C | 367 | VAL | A | 380 | TYR | B | 393 | THR | C | 374 | PHE |
| A | 328 | ARG | B | 330 | PRO | C | 318 | PHE | A | 369 | TYR | B | 375 | SER | C | 369 | TYR | A | 384 | PRO | B | 394 | ASN | C | 375 | SER |
| A | 335 | LEU | B | 331 | ASN | C | 319 | ARG | A | 370 | ASN | B | 376 | THR | C | 370 | ASN | A | 385 | THR | B | 399 | SER | C | 376 | THR |
| A | 336 | CYS | B | 332 | ILE | C | 320 | VAL | A | 371 | SER | B | 377 | PHE | C | 371 | SER | A | 386 | LYS | B | 402 | ILE | C | 377 | PHE |
| A | 337 | PRO | B | 333 | THR | C | 321 | GLN | A | 372 | ALA | B | 378 | LYS | C | 372 | ALA | A | 388 | ASN | B | 403 | ARG | C | 378 | LYS |
| A | 338 | PHE | B | 334 | ASN | C | 322 | PRO | A | 373 | SER | B | 379 | CYS | C | 373 | SER | A | 389 | ASP | B | 404 | GLY | C | 379 | CYS |
| A | 339 | GLY | B | 335 | LEU | C | 323 | THR | A | 374 | PHE | B | 380 | TYR | C | 374 | PHE | A | 390 | LEU | B | 405 | ASP | C | 380 | TYR |
| A | 340 | GLU | B | 336 | CYS | C | 324 | GLU | A | 375 | SER | B | 382 | VAL | C | 375 | SER | A | 393 | THR | B | 406 | GLU | C | 381 | GLY |
| A | 341 | VAL | B | 337 | PRO | C | 325 | SER | A | 376 | THR | B | 384 | PRO | C | 376 | THR | A | 394 | ASN | B | 407 | VAL | C | 382 | VAL |
| A | 342 | PHE | B | 338 | PHE | C | 327 | VAL | A | 377 | PHE | B | 385 | THR | C | 377 | PHE | A | 396 | TYR | B | 408 | ARG | C | 384 | PRO |
| A | 343 | ASN | B | 339 | GLY | C | 328 | ARG | A | 378 | LYS | B | 386 | LYS | C | 378 | LYS | A | 397 | ALA | B | 409 | GLN | C | 385 | THR |
| A | 344 | ALA | B | 340 | GLU | C | 329 | PHE | A | 379 | CYS | B | 388 | ASN | C | 379 | CYS | A | 399 | SER | B | 411 | ALA | C | 386 | LYS |
| A | 345 | THR | B | 342 | PHE | C | 330 | PRO | A | 380 | TYR | B | 389 | ASP | C | 380 | TYR | A | 403 | ARG | B | 412 | PRO | C | 388 | ASN |
| A | 346 | ARG | B | 343 | ASN | C | 331 | ASN | A | 383 | SER | B | 390 | LEU | C | 381 | GLY | A | 404 | GLY | B | 413 | GLY | C | 389 | ASP |
| A | 347 | PHE | B | 344 | ALA | C | 332 | ILE | A | 384 | PRO | B | 391 | CYS | C | 382 | VAL | A | 405 | ASP | B | 414 | GLN | C | 393 | THR |
| A | 348 | ALA | B | 345 | THR | C | 333 | THR | A | 385 | THR | B | 392 | PHE | C | 384 | PRO | A | 406 | GLU | B | 415 | THR | C | 394 | ASN |
| A | 349 | SER | B | 346 | ARG | C | 334 | ASN | A | 386 | LYS | B | 393 | THR | C | 385 | THR | A | 407 | VAL | B | 416 | GLY | C | 399 | SER |
| A | 351 | TYR | B | 347 | PHE | C | 335 | LEU | A | 388 | ASN | B | 394 | ASN | C | 386 | LYS | A | 408 | ARG | B | 417 | LYS | C | 404 | GLY |
| A | 352 | ALA | B | 348 | ALA | C | 336 | CYS | A | 389 | ASP | B | 399 | SER | C | 388 | ASN | A | 409 | GLN | B | 418 | ILE | C | 405 | ASP |
| A | 353 | TRP | B | 349 | SER | C | 337 | PRO | A | 390 | LEU | B | 402 | ILE | C | 389 | ASP | A | 410 | ILE | B | 419 | ALA | C | 407 | VAL |
| A | 354 | ASN | B | 351 | TYR | C | 338 | PHE | A | 392 | PHE | B | 403 | ARG | C | 390 | LEU | A | 411 | ALA | B | 420 | ASP | C | 408 | ARG |
| A | 355 | ARG | B | 352 | ALA | C | 339 | GLY | A | 393 | THR | B | 404 | GLY | C | 393 | THR | A | 412 | PRO | B | 421 | TYR | C | 409 | GLN |
| A | 356 | LYS | B | 353 | TRP | C | 340 | GLU | A | 394 | ASN | B | 405 | ASP | C | 399 | SER | A | 413 | GLY | B | 422 | ASN | C | 411 | ALA |
| A | 357 | ARG | B | 354 | ASN | C | 341 | VAL | A | 396 | TYR | B | 406 | GLU | C | 404 | GLY | A | 414 | GLN | B | 424 | LYS | C | 412 | PRO |
| A | 358 | ILE | B | 355 | ARG | C | 342 | PHE | A | 397 | ALA | B | 407 | VAL | C | 405 | ASP | A | 415 | THR | B | 425 | LEU | C | 413 | GLY |
| A | 359 | SER | B | 356 | LYS | C | 343 | ASN | A | 399 | SER | B | 408 | ARG | C | 407 | VAL | A | 416 | GLY | B | 426 | PRO | C | 414 | GLN |
| A | 360 | ASN | B | 357 | ARG | C | 344 | ALA | A | 403 | ARG | B | 409 | GLN | C | 408 | ARG | A | 417 | LYS | B | 427 | ASP | C | 415 | THR |
| A | 361 | CYS | B | 358 | ILE | C | 345 | THR | A | 404 | GLY | B | 410 | ILE | C | 409 | GLN | A | 418 | ILE | B | 428 | ASP | C | 416 | GLY |
| A | 362 | VAL | B | 359 | SER | C | 346 | ARG | A | 405 | ASP | B | 411 | ALA | C | 411 | ALA | A | 420 | ASP | B | 429 | PHE | C | 417 | LYS |
| A | 364 | ASP | B | 360 | ASN | C | 347 | PHE | A | 406 | GLU | B | 412 | PRO | C | 412 | PRO | A | 421 | TYR | B | 433 | VAL | C | 420 | ASP |
| A | 365 | TYR | B | 362 | VAL | C | 348 | ALA | A | 407 | VAL | B | 413 | GLY | C | 413 | GLY | A | 422 | ASN | B | 435 | ALA | C | 421 | TYR |
| A | 366 | SER | B | 364 | ASP | C | 349 | SER | A | 408 | ARG | B | 414 | GLN | C | 414 | GLN | A |     |     |   |     |     |   |     |     |

|   |     |     |   |     |     |   |     |     |   |     |     |   |     |     |   |     |     |   |     |     |   |     |     |   |     |     |
|---|-----|-----|---|-----|-----|---|-----|-----|---|-----|-----|---|-----|-----|---|-----|-----|---|-----|-----|---|-----|-----|---|-----|-----|
| A | 387 | LEU | B | 388 | ASN | C | 372 | ALA | A | 432 | CYS | B | 441 | LEU | C | 450 | ASN | A | 454 | ARG | B | 469 | SER | C | 468 | ILE |
| A | 388 | ASN | B | 389 | ASP | C | 373 | SER | A | 433 | VAL | B | 443 | SER | C | 451 | TYR | A | 491 | PRO | B | 470 | THR | C | 469 | SER |
| A | 389 | ASP | B | 390 | LEU | C | 374 | PHE | A | 435 | ALA | B | 449 | TYR | C | 452 | LEU | A | 492 | LEU | B | 471 | GLU | C | 470 | THR |
| A | 390 | LEU | B | 391 | CYS | C | 375 | SER | A | 436 | TRP | B | 450 | ASN | C | 453 | TYR | A | 493 | GLN | B | 472 | ILE | C | 471 | GLU |
| A | 391 | CYS | B | 392 | PHE | C | 376 | THR | A | 437 | ASN | B | 451 | TYR | C | 454 | ARG | A | 494 | SER | B | 473 | TYR | C | 487 | ASN |
| A | 392 | PHE | B | 393 | THR | C | 377 | PHE | A | 438 | SER | B | 452 | LEU | C | 460 | ASN | A | 495 | TYR | B | 487 | ASN | C | 488 | CYS |
| A | 394 | ASN | B | 394 | ASN | C | 378 | LYS | A | 439 | ASN | B | 453 | TYR | C | 462 | LYS | A | 496 | GLY | B | 488 | CYS | C | 489 | TYR |
| A | 396 | TYR | B | 396 | TYR | C | 379 | CYS | A | 440 | ASN | B | 454 | ARG | C | 463 | PRO | A | 497 | PHE | B | 489 | TYR | C | 490 | PHE |
| A | 397 | ALA | B | 399 | SER | C | 380 | TYR | A | 441 | LEU | B | 460 | ASN | C | 466 | ARG | A | 498 | GLN | B | 490 | PHE | C | 491 | PRO |
| A | 399 | SER | B | 402 | ILE | C | 381 | GLY | A | 442 | ASP | B | 461 | LEU | C | 468 | ILE | A | 499 | PRO | B | 491 | PRO | C | 492 | LEU |
| A | 403 | ARG | B | 403 | ARG | C | 382 | VAL | A | 443 | SER | B | 462 | LYS | C | 469 | SER | A | 500 | THR | B | 492 | LEU | C | 493 | GLN |
| A | 404 | GLY | B | 404 | GLY | C | 384 | PRO | A | 449 | TYR | B | 463 | PRO | C | 470 | THR | A | 503 | VAL | B | 493 | GLN | C | 494 | SER |
| A | 405 | ASP | B | 405 | ASP | C | 385 | THR | A | 450 | ASN | B | 464 | PHE | C | 471 | GLU | A | 504 | GLY | B | 494 | SER | C | 496 | GLY |
| A | 406 | GLU | B | 406 | GLU | C | 386 | LYS | A | 451 | TYR | B | 465 | GLU | C | 487 | ASN | A | 505 | TYR | B | 495 | TYR | C | 498 | GLN |
| A | 407 | VAL | B | 407 | VAL | C | 388 | ASN | A | 452 | LEU | B | 466 | ARG | C | 488 | CYS | A | 506 | GLN | B | 496 | GLY | C | 503 | VAL |
| A | 408 | ARG | B | 408 | ARG | C | 389 | ASP | A | 453 | TYR | B | 467 | ASP | C | 489 | TYR | A | 508 | TYR | B | 497 | PHE | C | 504 | GLY |
| A | 409 | GLN | B | 409 | GLN | C | 390 | LEU | A | 454 | ARG | B | 468 | ILE | C | 490 | PHE | A | 509 | ARG | B | 498 | GLN | C | 505 | TYR |
| A | 411 | ALA | B | 411 | ALA | C | 391 | CYS | A | 491 | PRO | B | 469 | SER | C | 491 | PRO | A | 514 | SER | B | 499 | PRO | C | 506 | GLN |
| A | 412 | PRO | B | 412 | PRO | C | 393 | THR | A | 492 | LEU | B | 470 | THR | C | 492 | LEU | A | 515 | PHE | B | 500 | THR | C | 508 | TYR |
| A | 413 | GLY | B | 413 | GLY | C | 394 | ASN | A | 493 | GLN | B | 471 | GLU | C | 493 | GLN | A | 516 | GLU | B | 503 | VAL | C | 514 | SER |
| A | 414 | GLN | B | 414 | GLN | C | 396 | TYR | A | 494 | SER | B | 472 | ILE | C | 494 | SER | A | 517 | LEU | B | 504 | GLY | C | 515 | PHE |
| A | 415 | THR | B | 415 | THR | C | 399 | SER | A | 495 | TYR | B | 473 | TYR | C | 496 | GLY | A | 518 | LEU | B | 505 | TYR | C | 517 | LEU |
| A | 416 | GLY | B | 416 | GLY | C | 401 | VAL | A | 496 | GLY | B | 487 | ASN | C | 498 | GLN | A | 521 | PRO | B | 506 | GLN | C | 518 | LEU |
| A | 417 | LYS | B | 417 | LYS | C | 402 | ILE | A | 497 | PHE | B | 488 | CYS | C | 503 | VAL | A | 522 | ALA | B | 508 | TYR | C | 519 | HIS |
| A | 418 | ILE | B | 418 | ILE | C | 403 | ARG | A | 498 | GLN | B | 489 | TYR | C | 504 | GLY | A | 523 | THR | B | 509 | ARG | C | 521 | PRO |
| A | 419 | ALA | B | 419 | ALA | C | 404 | GLY | A | 499 | PRO | B | 490 | PHE | C | 505 | TYR | A | 527 | PRO | B | 510 | VAL | C | 522 | ALA |
| A | 420 | ASP | B | 420 | ASP | C | 405 | ASP | A | 500 | THR | B | 491 | PRO | C | 506 | GLN | A | 528 | LYS | B | 514 | SER | C | 523 | THR |
| A | 421 | TYR | B | 421 | TYR | C | 406 | GLU | A | 503 | VAL | B | 492 | LEU | C | 508 | TYR | A | 529 | LYS | B | 515 | PHE | C | 527 | PRO |
| A | 422 | ASN | B | 422 | ASN | C | 407 | VAL | A | 504 | GLY | B | 493 | GLN | C | 514 | SER | A | 530 | SER | B | 516 | GLU | C | 528 | LYS |
| A | 423 | TYR | B | 424 | LYS | C | 408 | ARG | A | 505 | TYR | B | 494 | SER | C | 515 | PHE | A | 531 | THR | B | 517 | LEU | C | 529 | LYS |
| A | 424 | LYS | B | 425 | LEU | C | 409 | GLN | A | 506 | GLN | B | 495 | TYR | C | 516 | GLU | A | 532 | ASN | B | 518 | LEU | C | 530 | SER |
| A | 425 | LEU | B | 426 | PRO | C | 410 | ILE | A | 508 | TYR | B | 496 | GLY | C | 517 | LEU | A | 533 | LEU | B | 519 | HIS | C | 531 | THR |
| A | 426 | PRO | B | 427 | ASP | C | 411 | ALA | A | 509 | ARG | B | 497 | PHE | C | 518 | LEU | A | 534 | VAL | B | 520 | ALA | C | 532 | ASN |
| A | 427 | ASP | B | 428 | ASP | C | 412 | PRO | A | 514 | SER | B | 498 | GLN | C | 519 | HIS | A | 535 | LYS | B | 521 | PRO | C | 533 | LEU |
| A | 428 | ASP | B | 429 | PHE | C | 413 | GLY | A | 515 | PHE | B | 499 | PRO | C | 520 | ALA | A | 536 | ASN | B | 522 | ALA | C | 534 | VAL |
| A | 429 | PHE | B | 433 | VAL | C | 414 | GLN | A | 516 | GLU | B | 500 | THR | C | 521 | PRO | A | 537 | LYS | B | 523 | THR | C | 535 | LYS |
| A | 430 | THR | B | 435 | ALA | C | 415 | THR | A | 517 | LEU | B | 503 | VAL | C | 522 | ALA | A | 538 | CYS | B | 527 | PRO | C | 536 | ASN |
| A | 432 | CYS | B | 436 | TRP | C | 416 | GLY | A | 518 | LEU | B | 504 | GLY | C | 523 | THR | A | 540 | ASN | B | 528 | LYS | C | 537 | LYS |
| A | 433 | VAL | B | 437 | ASN | C | 417 | LYS | A | 519 | HIS | B | 505 | TYR | C | 527 | PRO | A | 542 | ASN | B | 529 | LYS | C | 538 | CYS |
| A | 435 | ALA | B | 438 | SER | C | 418 | ILE | A | 520 | ALA | B | 506 | GLN | C | 528 | LYS | A | 545 | GLY | B | 530 | SER | C | 540 | ASN |
| A | 436 | TRP | B | 439 | ASN | C | 419 | ALA | A | 521 | PRO | B | 507 | PRO | C | 529 | LYS | A | 547 | THR | B | 531 | THR | C | 542 | ASN |
| A | 437 | ASN | B | 440 | ASN | C | 420 | ASP | A | 522 | ALA | B | 508 | TYR | C | 530 | SER | A | 548 | GLY | B | 532 | ASN | C | 544 | ASN |
| A | 438 | SER | B | 441 | LEU | C | 421 | TYR | A | 523 | THR | B | 509 | ARG | C | 531 | THR | A | 549 | THR | B | 533 | LEU | C | 547 | THR |
| A | 439 | ASN | B | 442 | ASP | C | 422 | ASN | A | 527 | PRO | B | 510 | VAL | C | 532 | ASN | A | 551 | VAL | B | 534 | VAL | C | 548 | GLY |
| A | 440 | ASN | B | 443 | SER | C | 424 | LYS | A | 528 | LYS | B | 514 | SER | C | 533 | LEU | A | 553 | THR | B | 535 | LYS | C | 549 | THR |
| A | 441 | LEU | B | 449 | TYR | C | 425 | LEU | A | 529 | LYS | B | 515 | PHE | C | 534 | VAL | A | 554 | GLU | B | 536 | ASN | C | 551 | VAL |
| A | 442 | ASP | B | 450 | ASN | C | 426 | PRO | A | 530 | SER | B | 516 | GLU | C | 535 | LYS | A | 555 | SER | B | 537 | LYS | C | 553 | THR |
| A | 443 | SER | B | 451 | TYR | C | 427 | ASP | A | 531 | THR | B | 517 | LEU | C | 536 | ASN | A | 556 | ASN | B | 538 | CYS | C | 554 | GLU |
| A | 449 | TYR | B | 452 | LEU | C | 428 | ASP | A | 532 | ASN | B | 518 | LEU | C | 537 | LYS | A | 557 | LYS | B | 540 | ASN | C | 555 | SER |
| A | 450 | ASN | B | 453 | TYR | C | 429 | PHE | A | 533 | LEU | B | 519 | HIS | C | 538 | CYS | A | 558 | LYS | B | 542 | ASN | C | 556 | ASN |
| A | 451 | TYR | B | 454 | ARG | C | 433 | VAL | A | 534 | VAL | B | 520 | ALA | C | 540 | ASN | A | 559 | PHE | B | 544 | ASN | C | 557 | LYS |
| A | 452 | LEU | B | 460 | ASN | C | 435 | ALA | A | 535 | LYS | B | 521 | PRO | C | 542 | ASN | A | 560 | LEU | B | 545 | GLY | C | 558 | LYS |
| A | 453 | TYR | B | 461 | LEU | C | 436 | TRP | A | 536 | ASN | B | 522 | ALA | C | 544 | ASN | A | 561 | PRO | B | 546 | LEU | C | 559 | PHE |
| A | 454 | ARG | B | 462 | LYS | C | 437 | ASN | A | 537 | LYS | B | 523 | THR | C | 545 | GLY | A | 562 | PHE | B | 547 | THR | C | 560 | LEU |
| A | 491 | PRO | B | 463 | PRO | C | 438 | SER | A | 538 | CYS | B | 527 | PRO | C | 547 | THR | A | 567 | ARG | B | 548 | GLY | C | 561 | PRO |
| A | 492 | LEU | B | 464 | PHE | C | 439 | ASN | A | 540 | ASN | B | 528 | LYS | C | 548 | GLY | A | 568 | ASP | B | 549 | THR | C | 562 | PHE |
| A | 493 | GLN | B | 465 | GLU | C | 440 | ASN | A | 541 | PHE | B | 529 | LYS | C | 549 | THR | A | 569 | ILE | B | 551 | VAL | C | 564 | GLN |
| A | 494 | SER | B | 466 | ARG | C | 441 | LEU | A | 542 | ASN | B | 530 | SER | C | 551 | VAL | A | 570 | ALA | B | 553 | THR | C | 567 | ARG |
| A | 495 | TYR | B | 467 | ASP | C | 442 | ASP | A | 545 | GLY | B | 531 | THR | C | 553 | THR | A | 571 | ASP | B | 554 | GLU | C | 568 | ASP |
| A | 496 | GLY | B | 468 | ILE | C | 443 | SER | A | 546 | LEU | B | 532 | ASN | C | 554 | GLU | A | 572 | THR | B | 555 | SER | C | 569 | ILE |
| A | 497 | PHE | B | 469 | SER | C | 449 | TYR | A | 547 | THR | B | 533 | LEU | C | 555 | SER | A | 574 | ASP | B | 556 | ASN | C | 571 | ASP |
| A | 498 | GLN | B | 470 | THR | C | 450 | ASN | A | 548 | GLY | B | 534 | VAL | C | 556 | ASN | A | 577 | ARG | B | 557 | LYS | C | 572 | THR |
| A | 499 | PRO | B | 471 | GLU | C | 451 | TYR | A | 549 | THR | B | 535 | LYS | C | 557 | LYS | A | 579 | PRO | B | 558 | LYS | C | 573 | THR |
| A | 500 | THR | B | 472 | ILE | C | 452 | LEU | A | 551 | VAL | B | 536 | ASN | C | 558 | LYS | A | 580 | GLN | B | 559 | PHE | C | 574 | ASP |
| A | 503 | VAL | B | 473 | TYR | C | 453 | TYR | A | 553 | THR | B | 537 | LYS | C | 559 | PHE | A | 581 | THR | B | 560 | LEU | C | 577 | ARG |
| A | 504 | GLY | B | 487 | ASN | C | 454 | ARG | A | 554 | GLU | B | 538 | CYS | C | 560 | LEU | A | 582 | LEU | B | 561 | PRO | C | 579 | PRO |
| A | 505 | TYR | B | 488 | CYS | C | 460 | ASN | A | 555 | SER | B | 540 | ASN | C | 561 | PRO | A | 583 | GLU | B | 562 | PHE | C | 580 | GLN |
| A | 506 | GLN | B | 489 | TYR | C | 461 | LEU | A | 556 | ASN | B | 541 | PHE | C | 562 | PHE | A | 584 | ILE | B | 564 | GLN | C | 581 | THR |
| A | 508 | TYR | B | 490 | PHE | C | 462 | LYS | A | 557 | LYS | B | 542 | ASN | C | 564 | GLN | A | 586 | ASP | B | 565 | PHE | C | 582 | LEU |
| A | 509 | ARG | B | 491 | PRO | C |     |     |   |     |     |   |     |     |   |     |     |   |     |     |   |     |     |   |     |     |

|   |     |     |   |     |     |   |     |     |   |     |     |   |     |     |   |     |     |   |     |     |   |     |     |   |     |     |
|---|-----|-----|---|-----|-----|---|-----|-----|---|-----|-----|---|-----|-----|---|-----|-----|---|-----|-----|---|-----|-----|---|-----|-----|
| A | 533 | LEU | B | 516 | GLU | C | 503 | VAL | A | 586 | ASP | B | 569 | ILE | C | 592 | PHE | A | 620 | VAL | B | 600 | PRO | C | 617 | CYS |
| A | 534 | VAL | B | 517 | LEU | C | 504 | GLY | A | 587 | ILE | B | 570 | ALA | C | 595 | VAL | A | 640 | SER | B | 602 | THR | C | 618 | THR |
| A | 535 | LYS | B | 518 | LEU | C | 505 | TYR | A | 588 | THR | B | 571 | ASP | C | 596 | SER | A | 641 | ASN | B | 603 | ASN | C | 619 | GLU |
| A | 536 | ASN | B | 519 | HIS | C | 506 | GLN | A | 589 | PRO | B | 572 | THR | C | 600 | PRO | A | 642 | VAL | B | 604 | THR | C | 620 | VAL |
| A | 537 | LYS | B | 520 | ALA | C | 508 | TYR | A | 591 | SER | B | 573 | THR | C | 602 | THR | A | 643 | PHE | B | 605 | SER | C | 641 | ASN |
| A | 538 | CYS | B | 521 | PRO | C | 509 | ARG | A | 594 | GLY | B | 574 | ASP | C | 603 | ASN | A | 644 | GLN | B | 606 | ASN | C | 642 | VAL |
| A | 540 | ASN | B | 522 | ALA | C | 513 | LEU | A | 602 | THR | B | 577 | ARG | C | 604 | THR | A | 646 | ARG | B | 607 | GLN | C | 643 | PHE |
| A | 541 | PHE | B | 523 | THR | C | 514 | SER | A | 603 | ASN | B | 578 | ASP | C | 605 | SER | A | 651 | ILE | B | 608 | VAL | C | 644 | GLN |
| A | 542 | ASN | B | 525 | CYS | C | 515 | PHE | A | 604 | THR | B | 580 | GLN | C | 606 | ASN | A | 652 | GLY | B | 612 | TYR | C | 645 | THR |
| A | 543 | PHE | B | 526 | GLY | C | 516 | GLU | A | 605 | SER | B | 581 | THR | C | 607 | GLN | A | 654 | GLU | B | 613 | GLN | C | 646 | ARG |
| A | 544 | ASN | B | 527 | PRO | C | 517 | LEU | A | 606 | ASN | B | 582 | LEU | C | 608 | VAL | A | 655 | HIS | B | 614 | ASP | C | 651 | ILE |
| A | 545 | GLY | B | 528 | LYS | C | 518 | LEU | A | 607 | GLN | B | 583 | GLU | C | 610 | VAL | A | 656 | VAL | B | 615 | VAL | C | 652 | GLY |
| A | 546 | LEU | B | 529 | LYS | C | 519 | HIS | A | 608 | VAL | B | 584 | ILE | C | 612 | TYR | A | 657 | ASN | B | 616 | ASN | C | 654 | GLU |
| A | 547 | THR | B | 530 | SER | C | 520 | ALA | A | 610 | VAL | B | 586 | ASP | C | 613 | GLN | A | 658 | ASN | B | 617 | CYS | C | 655 | HIS |
| A | 548 | GLY | B | 531 | THR | C | 521 | PRO | A | 611 | LEU | B | 587 | ILE | C | 616 | ASN | A | 659 | SER | B | 618 | THR | C | 656 | VAL |
| A | 549 | THR | B | 532 | ASN | C | 522 | ALA | A | 612 | TYR | B | 588 | THR | C | 617 | CYS | A | 660 | TYR | B | 619 | GLU | C | 657 | ASN |
| A | 551 | VAL | B | 533 | LEU | C | 523 | THR | A | 613 | GLN | B | 589 | PRO | C | 618 | THR | A | 661 | GLU | B | 620 | VAL | C | 658 | ASN |
| A | 552 | LEU | B | 534 | VAL | C | 525 | CYS | A | 614 | ASP | B | 590 | CYS | C | 619 | GLU | A | 662 | CYS | B | 638 | THR | C | 659 | SER |
| A | 553 | THR | B | 535 | LYS | C | 527 | PRO | A | 615 | VAL | B | 591 | SER | C | 620 | VAL | A | 663 | ASP | B | 639 | GLY | C | 660 | TYR |
| A | 554 | GLU | B | 536 | ASN | C | 528 | LYS | A | 616 | ASN | B | 592 | PHE | C | 641 | ASN | A | 665 | PRO | B | 640 | SER | C | 661 | GLU |
| A | 555 | SER | B | 537 | LYS | C | 529 | LYS | A | 617 | CYS | B | 593 | GLY | C | 642 | VAL | A | 666 | ILE | B | 641 | ASN | C | 662 | CYS |
| A | 556 | ASN | B | 538 | CYS | C | 530 | SER | A | 618 | THR | B | 596 | SER | C | 643 | PHE | A | 668 | ALA | B | 642 | VAL | C | 663 | ASP |
| A | 557 | LYS | B | 540 | ASN | C | 531 | THR | A | 619 | GLU | B | 600 | PRO | C | 644 | GLN | A | 670 | ILE | B | 643 | PHE | C | 665 | PRO |
| A | 558 | LYS | B | 541 | PHE | C | 532 | ASN | A | 620 | VAL | B | 602 | THR | C | 645 | THR | A | 687 | VAL | B | 644 | GLN | C | 666 | ILE |
| A | 559 | PHE | B | 542 | ASN | C | 533 | LEU | A | 640 | SER | B | 603 | ASN | C | 646 | ARG | A | 690 | GLN | B | 645 | THR | C | 668 | ALA |
| A | 560 | LEU | B | 543 | PHE | C | 534 | VAL | A | 641 | ASN | B | 604 | THR | C | 651 | ILE | A | 691 | SER | B | 646 | ARG | C | 670 | ILE |
| A | 561 | PRO | B | 544 | ASN | C | 535 | LYS | A | 642 | VAL | B | 605 | SER | C | 652 | GLY | A | 693 | ILE | B | 651 | ILE | C | 687 | VAL |
| A | 562 | PHE | B | 545 | GLY | C | 536 | ASN | A | 643 | PHE | B | 606 | ASN | C | 654 | GLU | A | 696 | THR | B | 652 | GLY | C | 688 | ALA |
| A | 564 | GLN | B | 546 | LEU | C | 537 | LYS | A | 644 | GLN | B | 607 | GLN | C | 655 | HIS | A | 697 | MET | B | 654 | GLU | C | 690 | GLN |
| A | 565 | PHE | B | 547 | THR | C | 538 | CYS | A | 646 | ARG | B | 608 | VAL | C | 656 | VAL | A | 698 | SER | B | 655 | HIS | C | 691 | SER |
| A | 567 | ARG | B | 548 | GLY | C | 539 | VAL | A | 651 | ILE | B | 612 | TYR | C | 657 | ASN | A | 699 | LEU | B | 656 | VAL | C | 696 | THR |
| A | 568 | ASP | B | 549 | THR | C | 540 | ASN | A | 652 | GLY | B | 613 | GLN | C | 658 | ASN | A | 700 | GLY | B | 657 | ASN | C | 697 | MET |
| A | 569 | ILE | B | 551 | VAL | C | 541 | PHE | A | 654 | GLU | B | 614 | ASP | C | 659 | SER | A | 701 | ALA | B | 658 | ASN | C | 698 | SER |
| A | 570 | ALA | B | 552 | LEU | C | 542 | ASN | A | 655 | HIS | B | 615 | VAL | C | 660 | TYR | A | 702 | GLU | B | 659 | SER | C | 699 | LEU |
| A | 571 | ASP | B | 553 | THR | C | 543 | PHE | A | 656 | VAL | B | 616 | ASN | C | 661 | GLU | A | 703 | ASN | B | 660 | TYR | C | 700 | GLY |
| A | 572 | THR | B | 554 | GLU | C | 544 | ASN | A | 657 | ASN | B | 617 | CYS | C | 662 | CYS | A | 704 | SER | B | 661 | GLU | C | 701 | ALA |
| A | 573 | THR | B | 555 | SER | C | 545 | GLY | A | 658 | ASN | B | 618 | THR | C | 663 | ASP | A | 706 | ALA | B | 662 | CYS | C | 702 | GLU |
| A | 574 | ASP | B | 556 | ASN | C | 546 | LEU | A | 659 | SER | B | 619 | GLU | C | 665 | PRO | A | 707 | TYR | B | 663 | ASP | C | 703 | ASN |
| A | 576 | VAL | B | 557 | LYS | C | 547 | THR | A | 660 | TYR | B | 620 | VAL | C | 666 | ILE | A | 708 | SER | B | 665 | PRO | C | 704 | SER |
| A | 577 | ARG | B | 558 | LYS | C | 548 | GLY | A | 661 | GLU | B | 638 | THR | C | 668 | ALA | A | 709 | ASN | B | 666 | ILE | C | 706 | ALA |
| A | 579 | PRO | B | 559 | PHE | C | 549 | THR | A | 662 | CYS | B | 639 | GLY | C | 670 | ILE | A | 710 | ASN | B | 668 | ALA | C | 707 | TYR |
| A | 580 | GLN | B | 560 | LEU | C | 551 | VAL | A | 663 | ASP | B | 640 | SER | C | 687 | VAL | A | 711 | SER | B | 670 | ILE | C | 708 | SER |
| A | 581 | THR | B | 561 | PRO | C | 552 | LEU | A | 665 | PRO | B | 641 | ASN | C | 688 | ALA | A | 712 | ILE | B | 688 | ALA | C | 709 | ASN |
| A | 582 | LEU | B | 562 | PHE | C | 553 | THR | A | 666 | ILE | B | 642 | VAL | C | 689 | SER | A | 716 | THR | B | 689 | SER | C | 710 | ASN |
| A | 583 | GLU | B | 563 | GLN | C | 554 | GLU | A | 668 | ALA | B | 643 | PHE | C | 690 | GLN | A | 717 | ASN | B | 690 | GLN | C | 711 | SER |
| A | 584 | ILE | B | 564 | GLN | C | 555 | SER | A | 670 | ILE | B | 644 | GLN | C | 691 | SER | A | 719 | THR | B | 691 | SER | C | 716 | THR |
| A | 585 | LEU | B | 565 | PHE | C | 556 | ASN | A | 687 | VAL | B | 645 | THR | C | 696 | THR | A | 720 | ILE | B | 693 | ILE | C | 717 | ASN |
| A | 586 | ASP | B | 567 | ARG | C | 557 | LYS | A | 688 | ALA | B | 646 | ARG | C | 697 | MET | A | 721 | SER | B | 696 | THR | C | 719 | THR |
| A | 587 | ILE | B | 568 | ASP | C | 558 | LYS | A | 690 | GLN | B | 651 | ILE | C | 698 | SER | A | 722 | VAL | B | 697 | MET | C | 720 | ILE |
| A | 588 | THR | B | 569 | ILE | C | 559 | PHE | A | 691 | SER | B | 652 | GLY | C | 699 | LEU | A | 723 | THR | B | 698 | SER | C | 721 | SER |
| A | 589 | PRO | B | 570 | ALA | C | 560 | LEU | A | 693 | ILE | B | 654 | GLU | C | 700 | GLY | A | 724 | THR | B | 699 | LEU | C | 722 | VAL |
| A | 590 | CYS | B | 571 | ASP | C | 561 | PRO | A | 696 | THR | B | 655 | HIS | C | 701 | ALA | A | 725 | GLU | B | 700 | GLY | C | 723 | THR |
| A | 591 | SER | B | 572 | THR | C | 562 | PHE | A | 697 | MET | B | 656 | VAL | C | 702 | GLU | A | 727 | LEU | B | 701 | ALA | C | 724 | THR |
| A | 592 | PHE | B | 573 | THR | C | 563 | GLN | A | 698 | SER | B | 657 | ASN | C | 703 | ASN | A | 728 | PRO | B | 702 | GLU | C | 725 | GLU |
| A | 593 | GLY | B | 574 | ASP | C | 564 | GLN | A | 699 | LEU | B | 658 | ASN | C | 704 | SER | A | 730 | SER | B | 703 | ASN | C | 726 | ILE |
| A | 594 | GLY | B | 576 | VAL | C | 565 | PHE | A | 700 | GLY | B | 659 | SER | C | 706 | ALA | A | 732 | THR | B | 704 | SER | C | 727 | LEU |
| A | 595 | VAL | B | 577 | ARG | C | 567 | ARG | A | 701 | ALA | B | 660 | TYR | C | 707 | TYR | A | 733 | LYS | B | 705 | VAL | C | 728 | PRO |
| A | 596 | SER | B | 578 | ASP | C | 568 | ASP | A | 702 | GLU | B | 661 | GLU | C | 708 | SER | A | 737 | ASP | B | 706 | ALA | C | 730 | SER |
| A | 600 | PRO | B | 579 | PRO | C | 569 | ILE | A | 703 | ASN | B | 662 | CYS | C | 709 | ASN | A | 739 | THR | B | 707 | TYR | C | 732 | THR |
| A | 601 | GLY | B | 580 | GLN | C | 570 | ALA | A | 704 | SER | B | 663 | ASP | C | 710 | ASN | A | 740 | MET | B | 708 | SER | C | 733 | LYS |
| A | 602 | THR | B | 581 | THR | C | 571 | ASP | A | 705 | VAL | B | 665 | PRO | C | 711 | SER | A | 744 | GLY | B | 709 | ASN | C | 739 | THR |
| A | 603 | ASN | B | 582 | LEU | C | 572 | THR | A | 706 | ALA | B | 666 | ILE | C | 712 | ILE | A | 745 | ASP | B | 710 | ASN | C | 740 | MET |
| A | 604 | THR | B | 583 | GLU | C | 573 | THR | A | 707 | TYR | B | 668 | ALA | C | 717 | ASN | A | 747 | THR | B | 711 | SER | C | 743 | CYS |
| A | 605 | SER | B | 584 | ILE | C | 574 | ASP | A | 708 | SER | B | 670 | ILE | C | 719 | THR | A | 748 | GLU | B | 713 | ALA | C | 744 | GLY |
| A | 606 | ASN | B | 585 | LEU | C | 576 | VAL | A | 709 | ASN | B | 688 | ALA | C | 720 | ILE | A | 750 | SER | B | 716 | THR | C | 745 | ASP |
| A | 607 | GLN | B | 586 | ASP | C | 577 | ARG | A | 710 | ASN | B | 689 | SER | C | 721 | SER | A | 751 | ASN | B | 717 | ASN | C | 747 | THR |
| A | 608 | VAL | B | 587 | ILE | C | 578 | ASP | A | 711 | SER | B | 690 | GLN | C | 722 | VAL | A | 754 | LEU | B | 719 | THR | C | 748 | GLU |
| A | 610 | VAL | B | 588 | THR | C | 579 | PRO | A | 712 | ILE | B | 691 | SER | C | 723 | THR | A | 755 | GLN | B | 720 | ILE | C | 750 | SER |
| A | 611 | LEU | B | 589 | PRO | C | 580 | GLN | A | 716 | THR | B | 693 | ILE | C | 724 | THR | A | 757 | GLY | B | 721 | SER | C | 751 | ASN |
| A | 612 | TYR | B | 590 | CYS | C | 58  |     |   |     |     |   |     |     |   |     |     |   |     |     |   |     |     |   |     |     |

|   |     |     |   |     |     |   |     |     |   |     |     |   |     |     |   |     |     |   |     |     |   |     |     |   |     |     |
|---|-----|-----|---|-----|-----|---|-----|-----|---|-----|-----|---|-----|-----|---|-----|-----|---|-----|-----|---|-----|-----|---|-----|-----|
| A | 655 | HIS | B | 613 | GLN | C | 605 | SER | A | 750 | SER | B | 722 | VAL | C | 758 | SER | A | 788 | ILE | B | 754 | LEU | C | 785 | VAL |
| A | 656 | VAL | B | 614 | ASP | C | 606 | ASN | A | 751 | ASN | B | 723 | THR | C | 760 | CYS | A | 790 | LYS | B | 755 | GLN | C | 786 | LYS |
| A | 657 | ASN | B | 615 | VAL | C | 607 | GLN | A | 754 | LEU | B | 724 | THR | C | 761 | THR | A | 791 | THR | B | 756 | TYR | C | 787 | GLN |
| A | 658 | ASN | B | 616 | ASN | C | 608 | VAL | A | 755 | GLN | B | 725 | GLU | C | 764 | ASN | A | 792 | PRO | B | 757 | GLY | C | 790 | LYS |
| A | 659 | SER | B | 617 | CYS | C | 610 | VAL | A | 757 | GLY | B | 726 | ILE | C | 765 | ARG | A | 793 | PRO | B | 758 | SER | C | 791 | THR |
| A | 660 | TYR | B | 618 | THR | C | 611 | LEU | A | 758 | SER | B | 727 | LEU | C | 766 | ALA | A | 794 | ILE | B | 760 | CYS | C | 792 | PRO |
| A | 661 | GLU | B | 619 | GLU | C | 612 | TYR | A | 760 | CYS | B | 728 | PRO | C | 768 | THR | A | 795 | LYS | B | 761 | THR | C | 793 | PRO |
| A | 662 | CYS | B | 620 | VAL | C | 613 | GLN | A | 761 | THR | B | 730 | SER | C | 769 | GLY | A | 796 | ASP | B | 764 | ASN | C | 794 | ILE |
| A | 663 | ASP | B | 638 | THR | C | 614 | ASP | A | 762 | GLN | B | 731 | MET | C | 770 | ILE | A | 798 | GLY | B | 765 | ARG | C | 795 | LYS |
| A | 664 | ILE | B | 639 | GLY | C | 615 | VAL | A | 764 | ASN | B | 732 | THR | C | 772 | VAL | A | 799 | GLY | B | 768 | THR | C | 796 | ASP |
| A | 665 | PRO | B | 640 | SER | C | 616 | ASN | A | 765 | ARG | B | 733 | LYS | C | 773 | GLU | A | 801 | ASN | B | 769 | GLY | C | 798 | GLY |
| A | 666 | ILE | B | 641 | ASN | C | 617 | CYS | A | 766 | ALA | B | 735 | SER | C | 775 | ASP | A | 803 | SER | B | 772 | VAL | C | 799 | GLY |
| A | 668 | ALA | B | 642 | VAL | C | 618 | THR | A | 768 | THR | B | 739 | THR | C | 776 | LYS | A | 804 | GLN | B | 773 | GLU | C | 800 | PHE |
| A | 670 | ILE | B | 643 | PHE | C | 619 | GLU | A | 769 | GLY | B | 740 | MET | C | 777 | ASN | A | 807 | PRO | B | 775 | ASP | C | 801 | ASN |
| A | 672 | ALA | B | 644 | GLN | C | 620 | VAL | A | 772 | VAL | B | 744 | GLY | C | 778 | THR | A | 808 | ASP | B | 776 | LYS | C | 803 | SER |
| A | 687 | VAL | B | 645 | THR | C | 641 | ASN | A | 773 | GLU | B | 745 | ASP | C | 779 | GLN | A | 809 | PRO | B | 779 | GLN | C | 804 | GLN |
| A | 688 | ALA | B | 646 | ARG | C | 642 | VAL | A | 775 | ASP | B | 746 | SER | C | 780 | GLU | A | 810 | SER | B | 780 | GLU | C | 807 | PRO |
| A | 689 | SER | B | 647 | ALA | C | 643 | PHE | A | 776 | LYS | B | 747 | THR | C | 783 | ALA | A | 811 | LYS | B | 783 | ALA | C | 808 | ASP |
| A | 690 | GLN | B | 650 | LEU | C | 644 | GLN | A | 778 | THR | B | 748 | GLU | C | 784 | GLN | A | 815 | ARG | B | 784 | GLN | C | 809 | PRO |
| A | 691 | SER | B | 651 | ILE | C | 645 | THR | A | 779 | GLN | B | 750 | SER | C | 785 | VAL | A | 817 | PHE | B | 786 | LYS | C | 810 | SER |
| A | 693 | ILE | B | 652 | GLY | C | 646 | ARG | A | 780 | GLU | B | 751 | ASN | C | 786 | LYS | A | 820 | ASP | B | 787 | GLN | C | 811 | LYS |
| A | 695 | TYR | B | 654 | GLU | C | 647 | ALA | A | 783 | ALA | B | 752 | LEU | C | 787 | GLN | A | 821 | LEU | B | 788 | ILE | C | 815 | ARG |
| A | 696 | THR | B | 655 | HIS | C | 649 | CYS | A | 784 | GLN | B | 753 | LEU | C | 790 | LYS | A | 823 | PHE | B | 790 | LYS | C | 817 | PHE |
| A | 697 | MET | B | 656 | VAL | C | 651 | ILE | A | 785 | VAL | B | 754 | LEU | C | 791 | THR | A | 824 | ASN | B | 791 | THR | C | 820 | ASP |
| A | 698 | SER | B | 657 | ASN | C | 652 | GLY | A | 786 | LYS | B | 755 | GLN | C | 793 | PRO | A | 825 | LYS | B | 793 | PRO | C | 821 | LEU |
| A | 699 | LEU | B | 658 | ASN | C | 654 | GLU | A | 787 | GLN | B | 756 | TYR | C | 794 | ILE | A | 826 | VAL | B | 794 | ILE | C | 823 | PHE |
| A | 700 | GLY | B | 659 | SER | C | 655 | HIS | A | 788 | ILE | B | 757 | GLY | C | 795 | LYS | A | 827 | THR | B | 795 | LYS | C | 824 | ASN |
| A | 701 | ALA | B | 660 | TYR | C | 656 | VAL | A | 790 | LYS | B | 758 | SER | C | 796 | ASP | A | 828 | LEU | B | 796 | ASP | C | 825 | LYS |
| A | 702 | GLU | B | 661 | GLU | C | 657 | ASN | A | 791 | THR | B | 760 | CYS | C | 798 | GLY | A | 853 | GLN | B | 798 | GLY | C | 826 | VAL |
| A | 703 | ASN | B | 662 | CYS | C | 658 | ASN | A | 793 | PRO | B | 761 | THR | C | 799 | GLY | A | 854 | LYS | B | 799 | GLY | C | 827 | THR |
| A | 704 | SER | B | 663 | ASP | C | 659 | SER | A | 794 | ILE | B | 762 | GLN | C | 800 | PHE | A | 855 | PHE | B | 801 | ASN | C | 828 | LEU |
| A | 705 | VAL | B | 664 | ILE | C | 660 | TYR | A | 795 | LYS | B | 764 | ASN | C | 801 | ASN | A | 856 | ASN | B | 803 | SER | C | 853 | GLN |
| A | 706 | ALA | B | 665 | PRO | C | 661 | GLU | A | 796 | ASP | B | 765 | ARG | C | 803 | SER | A | 860 | VAL | B | 804 | GLN | C | 854 | LYS |
| A | 707 | TYR | B | 666 | ILE | C | 662 | CYS | A | 798 | GLY | B | 766 | ALA | C | 804 | GLN | A | 861 | LEU | B | 807 | PRO | C | 855 | PHE |
| A | 708 | SER | B | 668 | ALA | C | 663 | ASP | A | 799 | GLY | B | 768 | THR | C | 807 | PRO | A | 862 | PRO | B | 808 | ASP | C | 856 | ASN |
| A | 709 | ASN | B | 670 | ILE | C | 664 | ILE | A | 800 | PHE | B | 769 | GLY | C | 808 | ASP | A | 863 | PRO | B | 809 | PRO | C | 859 | THR |
| A | 710 | ASN | B | 672 | ALA | C | 665 | PRO | A | 801 | ASN | B | 772 | VAL | C | 809 | PRO | A | 864 | LEU | B | 810 | SER | C | 860 | VAL |
| A | 711 | SER | B | 687 | VAL | C | 666 | ILE | A | 803 | SER | B | 773 | GLU | C | 810 | SER | A | 866 | THR | B | 811 | LYS | C | 861 | LEU |
| A | 712 | ILE | B | 688 | ALA | C | 668 | ALA | A | 804 | GLN | B | 775 | ASP | C | 811 | LYS | A | 867 | ASP | B | 815 | ARG | C | 862 | PRO |
| A | 713 | ALA | B | 689 | SER | C | 670 | ILE | A | 807 | PRO | B | 776 | LYS | C | 815 | ARG | A | 868 | GLU | B | 817 | PHE | C | 863 | PRO |
| A | 716 | THR | B | 690 | GLN | C | 687 | VAL | A | 808 | ASP | B | 778 | THR | C | 817 | PHE | A | 870 | ILE | B | 820 | ASP | C | 864 | LEU |
| A | 717 | ASN | B | 691 | SER | C | 688 | ALA | A | 809 | PRO | B | 779 | GLN | C | 820 | ASP | A | 872 | GLN | B | 821 | LEU | C | 866 | THR |
| A | 719 | THR | B | 693 | ILE | C | 689 | SER | A | 810 | SER | B | 780 | GLU | C | 821 | LEU | A | 873 | TYR | B | 823 | PHE | C | 867 | ASP |
| A | 720 | ILE | B | 695 | TYR | C | 690 | GLN | A | 811 | LYS | B | 782 | PHE | C | 823 | PHE | A | 875 | SER | B | 824 | ASN | C | 868 | GLU |
| A | 721 | SER | B | 696 | THR | C | 691 | SER | A | 815 | ARG | B | 783 | ALA | C | 824 | ASN | A | 886 | TRP | B | 825 | LYS | C | 869 | MET |
| A | 722 | VAL | B | 697 | MET | C | 693 | ILE | A | 817 | PHE | B | 784 | GLN | C | 825 | LYS | A | 887 | THR | B | 827 | THR | C | 870 | ILE |
| A | 723 | THR | B | 698 | SER | C | 695 | TYR | A | 820 | ASP | B | 785 | VAL | C | 826 | VAL | A | 888 | PHE | B | 828 | LEU | C | 872 | GLN |
| A | 724 | THR | B | 699 | LEU | C | 696 | THR | A | 821 | LEU | B | 786 | LYS | C | 827 | THR | A | 891 | GLY | B | 853 | GLN | C | 873 | TYR |
| A | 725 | GLU | B | 700 | GLY | C | 697 | MET | A | 823 | PHE | B | 787 | GLN | C | 828 | LEU | A | 892 | ALA | B | 854 | LYS | C | 875 | SER |
| A | 726 | ILE | B | 701 | ALA | C | 698 | SER | A | 824 | ASN | B | 788 | ILE | C | 853 | GLN | A | 893 | ALA | B | 855 | PHE | C | 886 | TRP |
| A | 727 | LEU | B | 702 | GLU | C | 699 | LEU | A | 825 | LYS | B | 789 | TYR | C | 854 | LYS | A | 895 | GLN | B | 856 | ASN | C | 887 | THR |
| A | 728 | PRO | B | 703 | ASN | C | 700 | GLY | A | 826 | VAL | B | 790 | LYS | C | 855 | PHE | A | 896 | ILE | B | 860 | VAL | C | 889 | GLY |
| A | 730 | SER | B | 704 | SER | C | 701 | ALA | A | 827 | THR | B | 791 | THR | C | 856 | ASN | A | 899 | ALA | B | 861 | LEU | C | 891 | GLY |
| A | 731 | MET | B | 705 | VAL | C | 702 | GLU | A | 828 | LEU | B | 793 | PRO | C | 859 | THR | A | 904 | TYR | B | 862 | PRO | C | 892 | ALA |
| A | 732 | THR | B | 706 | ALA | C | 703 | ASN | A | 853 | GLN | B | 794 | ILE | C | 860 | VAL | A | 907 | ASN | B | 863 | PRO | C | 893 | ALA |
| A | 733 | LYS | B | 707 | TYR | C | 704 | SER | A | 854 | LYS | B | 795 | LYS | C | 861 | LEU | A | 908 | GLY | B | 864 | LEU | C | 895 | GLN |
| A | 734 | THR | B | 708 | SER | C | 705 | VAL | A | 855 | PHE | B | 796 | ASP | C | 862 | PRO | A | 909 | ILE | B | 866 | THR | C | 899 | ALA |
| A | 735 | SER | B | 709 | ASN | C | 706 | ALA | A | 856 | ASN | B | 798 | GLY | C | 863 | PRO | A | 910 | GLY | B | 867 | ASP | C | 904 | TYR |
| A | 736 | VAL | B | 710 | ASN | C | 707 | TYR | A | 860 | VAL | B | 799 | GLY | C | 864 | LEU | A | 912 | THR | B | 868 | GLU | C | 907 | ASN |
| A | 737 | ASP | B | 711 | SER | C | 708 | SER | A | 861 | LEU | B | 800 | PHE | C | 866 | THR | A | 918 | GLU | B | 869 | MET | C | 908 | GLY |
| A | 738 | CYS | B | 712 | ILE | C | 709 | ASN | A | 862 | PRO | B | 801 | ASN | C | 867 | ASP | A | 919 | ASN | B | 870 | ILE | C | 909 | ILE |
| A | 739 | THR | B | 713 | ALA | C | 710 | ASN | A | 863 | PRO | B | 802 | PHE | C | 868 | GLU | A | 921 | LYS | B | 872 | GLN | C | 910 | GLY |
| A | 740 | MET | B | 715 | PRO | C | 711 | SER | A | 864 | LEU | B | 803 | SER | C | 869 | MET | A | 922 | LEU | B | 873 | TYR | C | 912 | THR |
| A | 741 | TYR | B | 716 | THR | C | 712 | ILE | A | 866 | THR | B | 804 | GLN | C | 870 | ILE | A | 925 | ASN | B | 875 | SER | C | 913 | GLN |
| A | 742 | ILE | B | 717 | ASN | C | 713 | ALA | A | 867 | ASP | B | 807 | PRO | C | 872 | GLN | A | 926 | GLN | B | 886 | TRP | C | 918 | GLU |
| A | 743 | CYS | B | 719 | THR | C | 716 | THR | A | 868 | GLU | B | 808 | ASP | C | 873 | TYR | A | 928 | ASN | B | 887 | THR | C | 919 | ASN |
| A | 745 | ASP | B | 720 | ILE | C | 717 | ASN | A | 870 | ILE | B | 809 | PRO | C | 875 | SER | A | 929 | SER | B | 888 | PHE | C | 921 | LYS |
| A | 746 | SER | B | 721 | SER | C | 719 | THR | A | 872 | GLN | B | 810 | SER | C | 886 | TRP | A | 932 | GLY | B | 891 | GLY | C | 922 | LEU |
| A | 747 | THR | B | 722 | VAL | C | 720 | ILE | A | 873 | TYR | B | 811 | LYS | C | 887 | THR | A | 933 | LYS | B | 892 | ALA | C | 925 | ASN |
| A | 748 | GLU | B | 723 | THR | C | 721 | SER | A | 875 |     |   |     |     |   |     |     |   |     |     |   |     |     |   |     |     |

|   |     |     |   |     |     |   |     |     |   |      |     |   |     |     |   |      |     |   |      |     |   |      |     |   |      |     |
|---|-----|-----|---|-----|-----|---|-----|-----|---|------|-----|---|-----|-----|---|------|-----|---|------|-----|---|------|-----|---|------|-----|
| A | 772 | VAL | B | 747 | THR | C | 745 | ASP | A | 921  | LYS | B | 867 | ASP | C | 930  | ALA | A | 959  | LEU | B | 934  | ILE | C | 951  | VAL |
| A | 773 | GLU | B | 748 | GLU | C | 746 | SER | A | 922  | LEU | B | 868 | GLU | C | 932  | GLY | A | 960  | ASN | B | 935  | GLN | C | 952  | VAL |
| A | 774 | GLN | B | 750 | SER | C | 747 | THR | A | 925  | ASN | B | 869 | MET | C | 933  | LYS | A | 964  | LYS | B | 936  | ASP | C | 953  | ASN |
| A | 775 | ASP | B | 751 | ASN | C | 748 | GLU | A | 926  | GLN | B | 870 | ILE | C | 934  | ILE | A | 966  | LEU | B | 937  | SER | C | 954  | GLN |
| A | 776 | LYS | B | 752 | LEU | C | 750 | SER | A | 928  | ASN | B | 872 | GLN | C | 935  | GLN | A | 967  | SER | B | 939  | SER | C | 955  | ASN |
| A | 778 | THR | B | 753 | LEU | C | 751 | ASN | A | 929  | SER | B | 873 | TYR | C | 936  | ASP | A | 968  | SER | B | 940  | SER | C | 956  | ALA |
| A | 779 | GLN | B | 754 | LEU | C | 752 | LEU | A | 932  | GLY | B | 875 | SER | C | 937  | SER | A | 969  | ASN | B | 941  | THR | C | 957  | GLN |
| A | 780 | GLU | B | 755 | GLN | C | 753 | LEU | A | 933  | LYS | B | 886 | TRP | C | 938  | LEU | A | 970  | PHE | B | 942  | ALA | C | 959  | LEU |
| A | 782 | PHE | B | 756 | TYR | C | 754 | LEU | A | 934  | ILE | B | 887 | THR | C | 939  | SER | A | 971  | GLY | B | 943  | SER | C | 960  | ASN |
| A | 783 | ALA | B | 757 | GLY | C | 755 | GLN | A | 935  | GLN | B | 888 | PHE | C | 940  | SER | A | 972  | ALA | B | 944  | ALA | C | 964  | LYS |
| A | 784 | GLN | B | 758 | SER | C | 756 | TYR | A | 936  | ASP | B | 891 | GLY | C | 941  | THR | A | 973  | ILE | B | 946  | GLY | C | 967  | SER |
| A | 785 | VAL | B | 759 | PHE | C | 757 | GLY | A | 937  | SER | B | 892 | ALA | C | 942  | ALA | A | 974  | SER | B | 947  | LYS | C | 969  | ASN |
| A | 786 | LYS | B | 760 | CYS | C | 758 | SER | A | 939  | SER | B | 893 | ALA | C | 943  | SER | A | 975  | SER | B | 949  | GLN | C | 971  | GLY |
| A | 787 | GLN | B | 761 | THR | C | 759 | PHE | A | 940  | SER | B | 894 | LEU | C | 944  | ALA | A | 978  | ASN | B | 950  | ASP | C | 972  | ALA |
| A | 788 | ILE | B | 762 | GLN | C | 760 | CYS | A | 941  | THR | B | 895 | GLN | C | 946  | GLY | A | 979  | ASP | B | 952  | VAL | C | 973  | ILE |
| A | 789 | TYR | B | 763 | LEU | C | 761 | THR | A | 942  | ALA | B | 897 | PRO | C | 947  | LYS | A | 981  | LEU | B | 953  | ASN | C | 974  | SER |
| A | 790 | LYS | B | 764 | ASN | C | 762 | GLN | A | 943  | SER | B | 899 | ALA | C | 949  | GLN | A | 982  | SER | B | 954  | GLN | C | 976  | VAL |
| A | 791 | THR | B | 765 | ARG | C | 763 | LEU | A | 944  | ALA | B | 904 | TYR | C | 950  | ASP | A | 983  | ARG | B | 955  | ASN | C | 977  | LEU |
| A | 792 | PRO | B | 766 | ALA | C | 764 | ASN | A | 946  | GLY | B | 907 | ASN | C | 951  | VAL | A | 985  | ASP | B | 956  | ALA | C | 978  | ASN |
| A | 793 | PRO | B | 767 | LEU | C | 765 | ARG | A | 947  | LYS | B | 908 | GLY | C | 952  | VAL | A | 986  | PRO | B | 957  | GLN | C | 979  | ASP |
| A | 794 | ILE | B | 768 | THR | C | 766 | ALA | A | 949  | GLN | B | 909 | ILE | C | 953  | ASN | A | 987  | PRO | B | 959  | LEU | C | 981  | LEU |
| A | 795 | LYS | B | 769 | GLY | C | 767 | LEU | A | 950  | ASP | B | 910 | GLY | C | 954  | GLN | A | 988  | GLU | B | 960  | ASN | C | 982  | SER |
| A | 796 | ASP | B | 770 | ILE | C | 768 | THR | A | 951  | VAL | B | 912 | THR | C | 955  | ASN | A | 990  | GLU | B | 964  | LYS | C | 983  | ARG |
| A | 797 | PHE | B | 771 | ALA | C | 769 | GLY | A | 952  | VAL | B | 918 | GLU | C | 956  | ALA | A | 991  | VAL | B | 967  | SER | C | 984  | LEU |
| A | 798 | GLY | B | 772 | VAL | C | 770 | ILE | A | 953  | ASN | B | 919 | ASN | C | 957  | GLN | A | 992  | GLN | B | 969  | ASN | C | 985  | ASP |
| A | 799 | GLY | B | 773 | GLU | C | 771 | ALA | A | 954  | GLN | B | 921 | LYS | C | 958  | ALA | A | 995  | ARG | B | 972  | ALA | C | 986  | PRO |
| A | 800 | PHE | B | 774 | GLN | C | 772 | VAL | A | 956  | ALA | B | 922 | LEU | C | 959  | LEU | A | 998  | THR | B | 973  | ILE | C | 987  | PRO |
| A | 801 | ASN | B | 775 | ASP | C | 773 | GLU | A | 957  | GLN | B | 925 | ASN | C | 960  | ASN | A | 1000 | ARG | B | 974  | SER | C | 988  | GLU |
| A | 802 | PHE | B | 776 | LYS | C | 775 | ASP | A | 958  | ALA | B | 926 | GLN | C | 964  | LYS | A | 1002 | GLN | B | 975  | SER | C | 990  | GLU |
| A | 803 | SER | B | 777 | ASN | C | 776 | LYS | A | 959  | LEU | B | 928 | ASN | C | 967  | SER | A | 1005 | GLN | B | 976  | VAL | C | 991  | VAL |
| A | 804 | GLN | B | 778 | THR | C | 777 | ASN | A | 960  | ASN | B | 929 | SER | C | 969  | ASN | A | 1006 | THR | B | 977  | LEU | C | 992  | GLN |
| A | 807 | PRO | B | 779 | GLN | C | 778 | THR | A | 964  | LYS | B | 930 | ALA | C | 971  | GLY | A | 1009 | THR | B | 978  | ASN | C | 994  | ASP |
| A | 808 | ASP | B | 780 | GLU | C | 779 | GLN | A | 966  | LEU | B | 932 | GLY | C | 972  | ALA | A | 1010 | GLN | B | 979  | ASP | C | 995  | ARG |
| A | 809 | PRO | B | 782 | PHE | C | 780 | GLU | A | 967  | SER | B | 933 | LYS | C | 973  | ILE | A | 1012 | LEU | B | 981  | LEU | C | 998  | THR |
| A | 810 | SER | B | 783 | ALA | C | 782 | PHE | A | 968  | SER | B | 934 | ILE | C | 974  | SER | A | 1013 | ILE | B | 982  | SER | C | 1000 | ARG |
| A | 811 | LYS | B | 784 | GLN | C | 783 | ALA | A | 969  | ASN | B | 935 | GLN | C | 976  | VAL | A | 1014 | ARG | B | 983  | ARG | C | 1005 | GLN |
| A | 815 | ARG | B | 785 | VAL | C | 784 | GLN | A | 970  | PHE | B | 936 | ASP | C | 977  | LEU | A | 1016 | ALA | B | 984  | LEU | C | 1006 | THR |
| A | 817 | PHE | B | 786 | LYS | C | 785 | VAL | A | 971  | GLY | B | 937 | SER | C | 978  | ASN | A | 1017 | GLU | B | 985  | ASP | C | 1009 | THR |
| A | 819 | GLU | B | 787 | GLN | C | 786 | LYS | A | 972  | ALA | B | 938 | LEU | C | 979  | ASP | A | 1018 | ILE | B | 987  | PRO | C | 1010 | GLN |
| A | 820 | ASP | B | 788 | ILE | C | 787 | GLN | A | 973  | ILE | B | 939 | SER | C | 981  | LEU | A | 1019 | ARG | B | 988  | GLU | C | 1012 | LEU |
| A | 821 | LEU | B | 789 | TYR | C | 788 | ILE | A | 974  | SER | B | 940 | SER | C | 982  | SER | A | 1020 | ALA | B | 990  | GLU | C | 1013 | ILE |
| A | 823 | PHE | B | 790 | LYS | C | 789 | TYR | A | 975  | SER | B | 941 | THR | C | 983  | ARG | A | 1021 | SER | B | 991  | VAL | C | 1014 | ARG |
| A | 824 | ASN | B | 791 | THR | C | 790 | LYS | A | 977  | LEU | B | 942 | ALA | C | 984  | LEU | A | 1023 | ASN | B | 992  | GLN | C | 1016 | ALA |
| A | 825 | LYS | B | 792 | PRO | C | 791 | THR | A | 978  | ASN | B | 943 | SER | C | 985  | ASP | A | 1024 | LEU | B | 994  | ASP | C | 1017 | GLU |
| A | 826 | VAL | B | 793 | PRO | C | 792 | PRO | A | 979  | ASP | B | 944 | ALA | C | 986  | PRO | A | 1026 | ALA | B | 995  | ARG | C | 1019 | ARG |
| A | 827 | THR | B | 794 | ILE | C | 793 | PRO | A | 981  | LEU | B | 946 | GLY | C | 987  | PRO | A | 1027 | THR | B | 998  | THR | C | 1020 | ALA |
| A | 828 | LEU | B | 795 | LYS | C | 794 | ILE | A | 982  | SER | B | 947 | LYS | C | 988  | GLU | A | 1028 | LYS | B | 1000 | ARG | C | 1021 | SER |
| A | 853 | GLN | B | 796 | ASP | C | 795 | LYS | A | 983  | ARG | B | 949 | GLN | C | 990  | GLU | A | 1030 | SER | B | 1005 | GLN | C | 1023 | ASN |
| A | 854 | LYS | B | 797 | PHE | C | 796 | ASP | A | 985  | ASP | B | 950 | ASP | C | 991  | VAL | A | 1036 | GLN | B | 1009 | THR | C | 1024 | LEU |
| A | 855 | PHE | B | 798 | GLY | C | 797 | PHE | A | 986  | PRO | B | 951 | VAL | C | 992  | GLN | A | 1037 | SER | B | 1010 | GLN | C | 1026 | ALA |
| A | 856 | ASN | B | 799 | GLY | C | 798 | GLY | A | 987  | PRO | B | 952 | VAL | C | 995  | ARG | A | 1038 | LYS | B | 1012 | LEU | C | 1027 | THR |
| A | 857 | GLY | B | 800 | PHE | C | 799 | GLY | A | 988  | GLU | B | 953 | ASN | C | 998  | THR | A | 1039 | ARG | B | 1013 | ILE | C | 1028 | LYS |
| A | 858 | LEU | B | 801 | ASN | C | 800 | PHE | A | 990  | GLU | B | 954 | GLN | C | 1000 | ARG | A | 1040 | VAL | B | 1014 | ARG | C | 1030 | SER |
| A | 859 | THR | B | 802 | PHE | C | 801 | ASN | A | 991  | VAL | B | 955 | ASN | C | 1002 | GLN | A | 1041 | ASP | B | 1016 | ALA | C | 1036 | GLN |
| A | 860 | VAL | B | 803 | SER | C | 802 | PHE | A | 992  | GLN | B | 956 | ALA | C | 1005 | GLN | A | 1042 | PHE | B | 1017 | GLU | C | 1037 | SER |
| A | 861 | LEU | B | 804 | GLN | C | 803 | SER | A | 995  | ARG | B | 957 | GLN | C | 1006 | THR | A | 1044 | GLY | B | 1019 | ARG | C | 1038 | LYS |
| A | 862 | PRO | B | 807 | PRO | C | 804 | GLN | A | 998  | THR | B | 958 | ALA | C | 1009 | THR | A | 1045 | LYS | B | 1020 | ALA | C | 1039 | ARG |
| A | 863 | PRO | B | 808 | ASP | C | 805 | ILE | A | 1000 | ARG | B | 959 | LEU | C | 1010 | GLN | A | 1046 | GLY | B | 1021 | SER | C | 1040 | VAL |
| A | 864 | LEU | B | 809 | PRO | C | 807 | PRO | A | 1002 | GLN | B | 960 | ASN | C | 1012 | LEU | A | 1047 | TYR | B | 1023 | ASN | C | 1041 | ASP |
| A | 865 | LEU | B | 810 | SER | C | 808 | ASP | A | 1005 | GLN | B | 961 | THR | C | 1013 | ILE | A | 1048 | HIS | B | 1024 | LEU | C | 1042 | PHE |
| A | 866 | THR | B | 811 | LYS | C | 809 | PRO | A | 1006 | THR | B | 963 | VAL | C | 1014 | ARG | A | 1057 | PRO | B | 1026 | ALA | C | 1044 | GLY |
| A | 867 | ASP | B | 815 | ARG | C | 810 | SER | A | 1009 | THR | B | 964 | LYS | C | 1016 | ALA | A | 1058 | HIS | B | 1027 | THR | C | 1045 | LYS |
| A | 868 | GLU | B | 817 | PHE | C | 811 | LYS | A | 1010 | GLN | B | 966 | LEU | C | 1017 | GLU | A | 1068 | VAL | B | 1028 | LYS | C | 1046 | GLY |
| A | 869 | MET | B | 819 | GLU | C | 815 | ARG | A | 1012 | LEU | B | 967 | SER | C | 1019 | ARG | A | 1069 | PRO | B | 1030 | SER | C | 1047 | TYR |
| A | 870 | ILE | B | 820 | ASP | C | 817 | PHE | A | 1013 | ILE | B | 969 | ASN | C | 1020 | ALA | A | 1070 | ALA | B | 1036 | GLN | C | 1048 | HIS |
| A | 871 | ALA | B | 821 | LEU | C | 818 | ILE | A | 1014 | ARG | B | 971 | GLY | C | 1021 | SER | A | 1071 | GLN | B | 1037 | SER | C | 1057 | PRO |
| A | 872 | GLN | B | 823 | PHE | C | 819 | GLU | A | 1016 | ALA | B | 972 | ALA | C | 1023 | ASN | A | 1072 | GLU | B | 1038 | LYS | C | 1058 | HIS |
| A | 873 | TYR | B | 824 | ASN | C | 820 | ASP | A | 1017 | GLU | B | 973 | ILE | C | 1024 | LEU | A | 1073 | LYS | B | 1039 | ARG | C | 1068 | VAL |
| A | 875 | SER | B | 825 | LYS | C | 821 | LEU | A | 1018 | ILE | B | 974 | SER | C |      |     |   |      |     |   |      |     |   |      |     |



|   |      |     |   |     |     |   |     |     |
|---|------|-----|---|-----|-----|---|-----|-----|
| A | 917  | TYR | B | 872 | GLN | C | 868 | GLU |
| A | 918  | GLU | B | 873 | TYR | C | 869 | MET |
| A | 919  | ASN | B | 875 | SER | C | 870 | ILE |
| A | 920  | GLN | B | 879 | ALA | C | 871 | ALA |
| A | 921  | LYS | B | 884 | SER | C | 872 | GLN |
| A | 922  | LEU | B | 886 | TRP | C | 873 | TYR |
| A | 924  | ALA | B | 887 | THR | C | 875 | SER |
| A | 925  | ASN | B | 888 | PHE | C | 884 | SER |
| A | 926  | GLN | B | 889 | GLY | C | 886 | TRP |
| A | 928  | ASN | B | 891 | GLY | C | 887 | THR |
| A | 929  | SER | B | 892 | ALA | C | 889 | GLY |
| A | 930  | ALA | B | 893 | ALA | C | 890 | ALA |
| A | 931  | ILE | B | 894 | LEU | C | 891 | GLY |
| A | 932  | GLY | B | 895 | GLN | C | 892 | ALA |
| A | 933  | LYS | B | 896 | ILE | C | 893 | ALA |
| A | 934  | ILE | B | 897 | PRO | C | 894 | LEU |
| A | 935  | GLN | B | 899 | ALA | C | 895 | GLN |
| A | 936  | ASP | B | 900 | MET | C | 896 | ILE |
| A | 937  | SER | B | 902 | MET | C | 897 | PRO |
| A | 938  | LEU | B | 904 | TYR | C | 899 | ALA |
| A | 939  | SER | B | 907 | ASN | C | 900 | MET |
| A | 940  | SER | B | 908 | GLY | C | 904 | TYR |
| A | 941  | THR | B | 909 | ILE | C | 907 | ASN |
| A | 942  | ALA | B | 910 | GLY | C | 908 | GLY |
| A | 943  | SER | B | 912 | THR | C | 909 | ILE |
| A | 944  | ALA | B | 913 | GLN | C | 910 | GLY |
| A | 946  | GLY | B | 917 | TYR | C | 912 | THR |
| A | 947  | LYS | B | 918 | GLU | C | 913 | GLN |
| A | 949  | GLN | B | 919 | ASN | C | 915 | VAL |
| A | 950  | ASP | B | 920 | GLN | C | 917 | TYR |
| A | 951  | VAL | B | 921 | LYS | C | 918 | GLU |
| A | 952  | VAL | B | 922 | LEU | C | 919 | ASN |
| A | 953  | ASN | B | 924 | ALA | C | 920 | GLN |
| A | 954  | GLN | B | 925 | ASN | C | 921 | LYS |
| A | 955  | ASN | B | 926 | GLN | C | 922 | LEU |
| A | 956  | ALA | B | 928 | ASN | C | 924 | ALA |
| A | 957  | GLN | B | 929 | SER | C | 925 | ASN |
| A | 958  | ALA | B | 930 | ALA | C | 926 | GLN |
| A | 959  | LEU | B | 932 | GLY | C | 928 | ASN |
| A | 960  | ASN | B | 933 | LYS | C | 929 | SER |
| A | 961  | THR | B | 934 | ILE | C | 930 | ALA |
| A | 962  | LEU | B | 935 | GLN | C | 931 | ILE |
| A | 963  | VAL | B | 936 | ASP | C | 932 | GLY |
| A | 964  | LYS | B | 937 | SER | C | 933 | LYS |
| A | 965  | GLN | B | 938 | LEU | C | 934 | ILE |
| A | 966  | LEU | B | 939 | SER | C | 935 | GLN |
| A | 967  | SER | B | 940 | SER | C | 936 | ASP |
| A | 968  | SER | B | 941 | THR | C | 937 | SER |
| A | 969  | ASN | B | 942 | ALA | C | 938 | LEU |
| A | 970  | PHE | B | 943 | SER | C | 939 | SER |
| A | 971  | GLY | B | 944 | ALA | C | 940 | SER |
| A | 972  | ALA | B | 945 | LEU | C | 941 | THR |
| A | 973  | ILE | B | 946 | GLY | C | 942 | ALA |
| A | 974  | SER | B | 947 | LYS | C | 943 | SER |
| A | 975  | SER | B | 949 | GLN | C | 944 | ALA |
| A | 976  | VAL | B | 950 | ASP | C | 945 | LEU |
| A | 977  | LEU | B | 951 | VAL | C | 946 | GLY |
| A | 978  | ASN | B | 952 | VAL | C | 947 | LYS |
| A | 979  | ASP | B | 953 | ASN | C | 949 | GLN |
| A | 981  | LEU | B | 954 | GLN | C | 950 | ASP |
| A | 982  | SER | B | 955 | ASN | C | 951 | VAL |
| A | 983  | ARG | B | 956 | ALA | C | 952 | VAL |
| A | 984  | LEU | B | 957 | GLN | C | 953 | ASN |
| A | 985  | ASP | B | 958 | ALA | C | 954 | GLN |
| A | 986  | PRO | B | 959 | LEU | C | 955 | ASN |
| A | 987  | PRO | B | 960 | ASN | C | 956 | ALA |
| A | 988  | GLU | B | 961 | THR | C | 957 | GLN |
| A | 990  | GLU | B | 963 | VAL | C | 958 | ALA |
| A | 991  | VAL | B | 964 | LYS | C | 959 | LEU |
| A | 992  | GLN | B | 965 | GLN | C | 960 | ASN |
| A | 994  | ASP | B | 966 | LEU | C | 961 | THR |
| A | 995  | ARG | B | 967 | SER | C | 962 | LEU |
| A | 996  | LEU | B | 968 | SER | C | 963 | VAL |
| A | 997  | ILE | B | 969 | ASN | C | 964 | LYS |
| A | 998  | THR | B | 970 | PHE | C | 966 | LEU |
| A | 999  | GLY | B | 971 | GLY | C | 967 | SER |
| A | 1000 | ARG | B | 972 | ALA | C | 968 | SER |
| A | 1001 | LEU | B | 973 | ILE | C | 969 | ASN |
| A | 1002 | GLN | B | 974 | SER | C | 970 | PHE |
| A | 1003 | SER | B | 975 | SER | C | 971 | GLY |
| A | 1004 | LEU | B | 976 | VAL | C | 972 | ALA |
| A | 1005 | GLN | B | 977 | LEU | C | 973 | ILE |
| A | 1006 | THR | B | 978 | ASN | C | 974 | SER |
| A | 1007 | TYR | B | 979 | ASP | C | 975 | SER |
| A | 1009 | THR | B | 981 | LEU | C | 976 | VAL |
| A | 1010 | GLN | B | 982 | SER | C | 977 | LEU |
| A | 1012 | LEU | B | 983 | ARG | C | 978 | ASN |
| A | 1013 | ILE | B | 984 | LEU | C | 979 | ASP |
| A | 1014 | ARG | B | 985 | ASP | C | 981 | LEU |
| A | 1016 | ALA | B | 986 | PRO | C | 982 | SER |

|   |      |     |   |      |     |   |      |     |
|---|------|-----|---|------|-----|---|------|-----|
| A | 1048 | HIS | B | 1009 | THR | C | 1072 | GLU |
| A | 1057 | PRO | B | 1010 | GLN | C | 1073 | LYS |
| A | 1058 | HIS | B | 1012 | LEU | C | 1074 | ASN |
| A | 1068 | VAL | B | 1013 | ILE | C | 1075 | PHE |
| A | 1069 | PRO | B | 1014 | ARG | C | 1076 | THR |
| A | 1070 | ALA | B | 1016 | ALA | C | 1079 | PRO |
| A | 1071 | GLN | B | 1017 | GLU | C | 1082 | CYS |
| A | 1072 | GLU | B | 1018 | ILE | C | 1083 | HIS |
| A | 1073 | LYS | B | 1019 | ARG | C | 1084 | ASP |
| A | 1074 | ASN | B | 1020 | ALA | C | 1085 | GLY |
| A | 1076 | THR | B | 1021 | SER | C | 1086 | LYS |
| A | 1083 | HIS | B | 1023 | ASN | C | 1091 | ARG |
| A | 1084 | ASP | B | 1024 | LEU | C | 1092 | GLU |
| A | 1085 | GLY | B | 1026 | ALA | C | 1093 | GLY |
| A | 1086 | LYS | B | 1027 | THR | C | 1098 | ASN |
| A | 1091 | ARG | B | 1028 | LYS | C | 1099 | GLY |
| A | 1092 | GLU | B | 1030 | SER | C | 1100 | THR |
| A | 1093 | GLY | B | 1036 | GLN | C | 1101 | HIS |
| A | 1098 | ASN | B | 1037 | SER | C | 1102 | TRP |
| A | 1099 | GLY | B | 1038 | LYS | C | 1103 | PHE |
| A | 1100 | THR | B | 1039 | ARG | C | 1104 | VAL |
| A | 1101 | HIS | B | 1040 | VAL | C | 1106 | GLN |
| A | 1102 | TRP | B | 1041 | ASP | C | 1107 | ARG |
| A | 1103 | PHE | B | 1042 | PHE | C | 1108 | ASN |
| A | 1107 | ARG | B | 1044 | GLY | C | 1109 | PHE |
| A | 1108 | ASN | B | 1045 | LYS | C | 1110 | TYR |
| A | 1109 | PHE | B | 1046 | GLY | C | 1111 | GLU |
| A | 1110 | TYR | B | 1047 | TYR | C | 1112 | PRO |
| A | 1111 | GLU | B | 1056 | ALA | C | 1113 | GLN |
| A | 1112 | PRO | B | 1057 | PRO | C | 1114 | ILE |
| A | 1113 | GLN | B | 1058 | HIS | C | 1116 | THR |
| A | 1114 | ILE | B | 1068 | VAL | C | 1117 | THR |
| A | 1116 | THR | B | 1069 | PRO | C | 1118 | ASP |
| A | 1117 | THR | B | 1070 | ALA | C | 1119 | ASN |
| A | 1118 | ASP | B | 1071 | GLN | C | 1121 | PHE |
| A | 1119 | ASN | B | 1072 | GLU | C | 1122 | VAL |
| A | 1121 | PHE | B | 1073 | LYS | C | 1123 | SER |
| A | 1122 | VAL | B | 1074 | ASN | C | 1124 | GLY |
| A | 1123 | SER | B | 1075 | PHE | C | 1125 | ASN |
| A | 1124 | GLY | B | 1076 | THR | C | 1126 | CYS |
| A | 1125 | ASN | B | 1082 | CYS | C | 1127 | ASP |
| A | 1126 | CYS | B | 1083 | HIS | C | 1128 | VAL |
| A | 1127 | ASP | B | 1084 | ASP | C | 1129 | VAL |
| A | 1128 | VAL | B | 1085 | GLY | C | 1130 | ILE |
| A | 1129 | VAL | B | 1086 | LYS | C | 1131 | GLY |
| A | 1130 | ILE | B | 1088 | HIS | C | 1132 | ILE |
| A | 1131 | GLY | B | 1091 | ARG | C | 1133 | VAL |
| A | 1132 | ILE | B | 1092 | GLU | C | 1134 | ASN |
| A | 1133 | VAL | B | 1097 | SER | C | 1135 | ASN |
| A | 1134 | ASN | B | 1098 | ASN | C | 1136 | THR |
| A | 1135 | ASN | B | 1099 | GLY | C | 1138 | TYR |
| A | 1136 | THR | B | 1100 | THR | C | 1139 | ASP |
| A | 1137 | VAL | B | 1101 | HIS | C | 1140 | PRO |
| A | 1138 | TYR | B | 1102 | TRP | C | 1141 | LEU |
| A | 1139 | ASP | B | 1103 | PHE | C | 1142 | GLN |
| A | 1140 | PRO | B | 1106 | GLN | C | 1143 | PRO |
| A | 1141 | LEU | B | 1107 | ARG | C | 1144 | GLU |
| A | 1142 | GLN | B | 1108 | ASN | C | 1145 | LEU |
| A | 1143 | PRO | B | 1109 | PHE | C | 1146 | ASP |
| A | 1144 | GLU | B | 1110 | TYR |   |      |     |
| A | 1145 | LEU | B | 1111 | GLU |   |      |     |
| A | 1146 | ASP | B | 1112 | PRO |   |      |     |
|   |      |     | B | 1113 | GLN |   |      |     |
|   |      |     | B | 1114 | ILE |   |      |     |
|   |      |     | B | 1116 | THR |   |      |     |
|   |      |     | B | 1117 | THR |   |      |     |
|   |      |     | B | 1118 | ASP |   |      |     |
|   |      |     | B | 1119 | ASN |   |      |     |
|   |      |     | B | 1120 | THR |   |      |     |
|   |      |     | B | 1121 | PHE |   |      |     |
|   |      |     | B | 1122 | VAL |   |      |     |
|   |      |     | B | 1124 | GLY |   |      |     |
|   |      |     | B | 1125 | ASN |   |      |     |
|   |      |     | B | 1126 | CYS |   |      |     |
|   |      |     | B | 1127 | ASP |   |      |     |
|   |      |     | B | 1128 | VAL |   |      |     |
|   |      |     | B | 1129 | VAL |   |      |     |
|   |      |     | B | 1130 | ILE |   |      |     |
|   |      |     | B | 1131 | GLY |   |      |     |
|   |      |     | B | 1132 | ILE |   |      |     |
|   |      |     | B | 1133 | VAL |   |      |     |
|   |      |     | B | 1134 | ASN |   |      |     |
|   |      |     | B | 1135 | ASN |   |      |     |
|   |      |     | B | 1136 | THR |   |      |     |
|   |      |     | B | 1138 | TYR |   |      |     |
|   |      |     | B | 1139 | ASP |   |      |     |
|   |      |     | B | 1140 | PRO |   |      |     |
|   |      |     | B | 1141 | LEU |   |      |     |
|   |      |     | B | 1142 | GLN |   |      |     |
|   |      |     | B | 1143 | PRO |   |      |     |
|   |      |     | B | 1144 | GLU |   |      |     |
|   |      |     | B | 1145 | LEU |   |      |     |
|   |      |     | B | 1146 | ASP |   |      |     |

|   |      |     |   |      |     |   |      |     |
|---|------|-----|---|------|-----|---|------|-----|
| A | 1116 | THR | B | 1085 | GLY | C | 1106 | GLN |
| A | 1117 | THR | B | 1086 | LYS | C | 1107 | ARG |
| A | 1118 | ASP | B | 1088 | HIS | C | 1108 | ASN |
| A | 1119 | ASN | B | 1091 | ARG | C | 1109 | PHE |
| A | 1121 | PHE | B | 1092 | GLU | C | 1110 | TYR |
| A | 1122 | VAL | B | 1097 | SER | C | 1111 | GLU |
| A | 1123 | SER | B | 1098 | ASN | C | 1112 | PRO |
| A | 1124 | GLY | B | 1099 | GLY | C | 1113 | GLN |
| A | 1125 | ASN | B | 1100 | THR | C | 1114 | ILE |
| A | 1126 | CYS | B | 1101 | HIS | C | 1116 | THR |
| A | 1127 | ASP | B | 1102 | TRP | C | 1117 | THR |
| A | 1128 | VAL | B | 1103 | PHE | C | 1118 | ASP |
| A | 1129 | VAL | B | 1106 | GLN | C | 1119 | ASN |
| A | 1130 | ILE | B | 1107 | ARG | C | 1121 | PHE |
| A | 1131 | GLY | B | 1108 | ASN | C | 1122 | VAL |
| A | 1132 | ILE | B | 1109 | PHE | C | 1123 | SER |
| A | 1133 | VAL | B | 1110 | TYR | C | 1124 | GLY |
| A | 1134 | ASN | B | 1111 | GLU | C | 1125 | ASN |
| A | 1135 | ASN | B | 1112 | PRO | C | 1126 | CYS |
| A | 1136 | THR | B | 1113 | GLN | C | 1127 | ASP |
| A | 1137 | VAL | B | 1114 | ILE | C | 1128 | VAL |
| A | 1138 | TYR | B | 1116 | THR | C | 1129 | VAL |
| A | 1139 | ASP | B | 1117 | THR | C | 1130 | ILE |
| A | 1140 | PRO | B | 1118 | ASP | C | 1131 | GLY |
| A | 1141 | LEU | B | 1119 | ASN | C | 1132 | ILE |
| A | 1142 | GLN | B | 1121 | PHE | C | 1133 | VAL |
| A | 1143 | PRO | B | 1122 | VAL | C | 1134 | ASN |
| A | 1144 | GLU | B | 1124 | GLY | C | 1135 | ASN |
| A | 1145 | LEU | B | 1125 | ASN | C | 1136 | THR |
| A | 1146 | ASP | B | 1126 | CYS | C | 1138 | TYR |
|   |      |     | B | 1127 | ASP | C | 1139 | ASP |
|   |      |     | B | 1128 | VAL | C | 1140 | PRO |
|   |      |     | B | 1129 | VAL | C | 1141 | LEU |
|   |      |     | B | 1130 | ILE | C | 1142 | GLN |
|   |      |     | B | 1131 | GLY | C | 1143 | PRO |
|   |      |     | B | 1132 | ILE | C | 1144 | GLU |
|   |      |     | B | 1133 | VAL | C | 1145 | LEU |
|   |      |     | B | 1134 | ASN | C | 1146 | ASP |
|   |      |     | B | 1135 | ASN |   |      |     |
|   |      |     | B | 1136 | THR |   |      |     |
|   |      |     | B | 1138 | TYR |   |      |     |
|   |      |     | B | 1139 | ASP |   |      |     |
|   |      |     | B | 1140 | PRO |   |      |     |
|   |      |     | B | 1141 | LEU |   |      |     |
|   |      |     | B | 1142 | GLN |   |      |     |
|   |      |     | B | 1143 | PRO |   |      |     |
|   |      |     | B | 1144 | GLU |   |      |     |
|   |      |     | B | 1145 | LEU |   |      |     |
|   |      |     | B | 1146 | ASP |   |      |     |

|   |      |     |   |      |     |   |      |     |
|---|------|-----|---|------|-----|---|------|-----|
| A | 1017 | GLU | B | 987  | PRO | C | 983  | ARG |
| A | 1018 | ILE | B | 988  | GLU | C | 984  | LEU |
| A | 1019 | ARG | B | 990  | GLU | C | 985  | ASP |
| A | 1020 | ALA | B | 991  | VAL | C | 986  | PRO |
| A | 1021 | SER | B | 992  | GLN | C | 987  | PRO |
| A | 1023 | ASN | B | 993  | ILE | C | 988  | GLU |
| A | 1024 | LEU | B | 994  | ASP | C | 990  | GLU |
| A | 1026 | ALA | B | 995  | ARG | C | 991  | VAL |
| A | 1027 | THR | B | 997  | ILE | C | 992  | GLN |
| A | 1028 | LYS | B | 998  | THR | C | 993  | ILE |
| A | 1030 | SER | B | 999  | GLY | C | 994  | ASP |
| A | 1031 | GLU | B | 1000 | ARG | C | 995  | ARG |
| A | 1036 | GLN | B | 1001 | LEU | C | 996  | LEU |
| A | 1037 | SER | B | 1002 | GLN | C | 998  | THR |
| A | 1038 | LYS | B | 1003 | SER | C | 999  | GLY |
| A | 1039 | ARG | B | 1004 | LEU | C | 1000 | ARG |
| A | 1040 | VAL | B | 1005 | GLN | C | 1002 | GLN |
| A | 1041 | ASP | B | 1006 | THR | C | 1003 | SER |
| A | 1042 | PHE | B | 1007 | TYR | C | 1005 | GLN |
| A | 1044 | GLY | B | 1008 | VAL | C | 1006 | THR |
| A | 1045 | LYS | B | 1009 | THR | C | 1007 | TYR |
| A | 1046 | GLY | B | 1010 | GLN | C | 1008 | VAL |
| A | 1047 | TYR | B | 1011 | GLN | C | 1009 | THR |
| A | 1048 | HIS | B | 1012 | LEU | C | 1010 | GLN |
| A | 1057 | PRO | B | 1013 | ILE | C | 1012 | LEU |
| A | 1058 | HIS | B | 1014 | ARG | C | 1013 | ILE |
| A | 1061 | VAL | B | 1015 | ALA | C | 1014 | ARG |
| A | 1068 | VAL | B | 1016 | ALA | C | 1016 | ALA |
| A | 1069 | PRO | B | 1017 | GLU | C | 1017 | GLU |
| A | 1070 | ALA | B | 1018 | ILE | C | 1019 | ARG |
| A | 1071 | GLN | B | 1019 | ARG | C | 1020 | ALA |
| A | 1072 | GLU | B | 1020 | ALA | C | 1021 | SER |
| A | 1073 | LYS | B | 1021 | SER | C | 1023 | ASN |
| A | 1074 | ASN | B | 1023 | ASN | C | 1024 | LEU |
| A | 1075 | PHE | B | 1024 | LEU | C | 1026 | ALA |
| A | 1076 | THR | B | 1026 | ALA | C | 1027 | THR |
| A | 1077 | THR | B | 1027 | THR | C | 1028 | LYS |
| A | 1079 | PRO | B | 1028 | LYS | C | 1030 | SER |
| A | 1082 | CYS | B | 1030 | SER | C | 1031 | GLU |
| A | 1083 | HIS | B | 1031 | GLU | C | 1036 | GLN |
| A | 1084 | ASP | B | 1035 | GLY | C | 1037 | SER |
| A | 1085 | GLY | B | 1036 | GLN | C | 1038 | LYS |
| A | 1086 | LYS | B | 1037 | SER | C | 1039 | ARG |
| A | 1088 | HIS | B | 1038 | LYS | C | 1040 | VAL |
| A | 1090 | PRO | B | 1039 | ARG | C | 1041 | ASP |
| A | 1091 | ARG | B | 1040 | VAL | C | 1042 | PHE |
| A | 1092 | GLU | B | 1041 | ASP | C | 1043 | CYS |
| A | 1093 | GLY | B | 1042 | PHE | C | 1044 | GLY |
| A | 1098 | ASN | B | 1043 | CYS | C | 1045 | LYS |
| A | 1099 | GLY | B | 1044 | GLY | C | 1046 | GLY |
| A | 1100 | THR | B | 1045 | LYS | C | 1047 | TYR |
| A | 1101 | HIS | B | 1046 | GLY | C | 1048 | HIS |
| A | 1102 | TRP | B | 1047 | TYR | C | 1057 | PRO |
| A | 1103 | PHE | B | 1048 | HIS | C | 1058 | HIS |
| A | 1106 | GLN | B | 1055 | SER | C | 1061 | VAL |
| A | 1107 | ARG | B | 1056 | ALA | C | 1068 | VAL |
| A | 1108 | ASN | B | 1057 | PRO | C | 1069 | PRO |
| A | 1109 | PHE | B | 1058 | HIS | C | 1070 | ALA |
| A | 1110 | TYR | B | 1061 | VAL | C | 1071 | GLN |
| A | 1111 | GLU | B | 1068 | VAL | C | 1072 | GLU |
| A | 1112 | PRO | B | 1069 | PRO | C | 1073 | LYS |
| A | 1113 | GLN | B | 1070 | ALA | C | 1074 | ASN |
| A | 1114 | ILE | B | 1071 | GLN | C | 1075 | PHE |
| A | 1115 | ILE | B | 1072 | GLU | C | 1076 | THR |
| A | 1116 | THR | B | 1073 | LYS | C | 1077 | THR |
| A | 1117 | THR | B | 1074 | ASN | C | 1079 | PRO |
| A | 1118 | ASP | B | 1075 | PHE | C | 1082 | CYS |
| A | 1119 | ASN | B | 1076 | THR | C | 1083 | HIS |
| A | 1120 | THR | B | 1077 | THR | C | 1084 | ASP |
| A | 1121 | PHE | B | 1079 | PRO | C | 1085 | GLY |
| A | 1122 | VAL | B | 1083 | HIS | C | 1086 | LYS |
| A | 1123 | SER | B | 1084 | ASP | C | 1088 | HIS |
| A | 1124 | GLY | B | 1085 | GLY | C | 1090 | PRO |
| A | 1125 | ASN | B | 1086 | LYS | C | 1091 | ARG |
| A | 1126 | CYS | B | 1088 | HIS | C | 1092 | GLU |
| A | 1127 | ASP | B | 1090 | PRO | C | 1093 | GLY |
| A | 1128 | VAL | B | 1091 | ARG | C | 1094 | VAL |
| A | 1129 | VAL | B | 1092 | GLU | C | 1097 | SER |
| A | 1130 | ILE | B | 1093 | GLY | C | 1098 | ASN |
| A | 1131 | GLY | B | 1097 | SER | C | 1099 | GLY |
| A | 1132 | ILE | B | 1098 | ASN | C | 1100 | THR |
| A | 1133 | VAL | B | 1099 | GLY | C | 1101 | HIS |
| A | 1134 | ASN | B | 1100 | THR | C | 1102 | TRP |
| A | 1135 | ASN | B | 1101 | HIS | C | 1103 | PHE |
| A | 1136 | THR | B | 1102 | TRP | C | 1104 | VAL |
| A | 1137 | VAL | B | 1103 | PHE | C | 1106 | GLN |
| A | 1138 | TYR | B | 1106 | GLN | C | 1107 | ARG |
| A | 1139 | ASP | B | 1107 | ARG | C | 1108 | ASN |
| A | 1140 | PRO | B | 1108 | ASN | C | 1109 | PHE |
| A | 1141 | LEU | B | 1109 | PHE | C | 1110 | TYR |

|   |      |     |
|---|------|-----|
| B | 1144 | GLU |
| B | 1145 | LEU |
| B | 1146 | ASP |

|   |      |     |   |      |     |   |      |     |
|---|------|-----|---|------|-----|---|------|-----|
| A | 1142 | GLN | B | 1110 | TYR | C | 1111 | GLU |
| A | 1143 | PRO | B | 1111 | GLU | C | 1112 | PRO |
| A | 1144 | GLU | B | 1112 | PRO | C | 1113 | GLN |
| A | 1145 | LEU | B | 1113 | GLN | C | 1114 | ILE |
| A | 1146 | ASP | B | 1114 | ILE | C | 1116 | THR |
|   |      |     | B | 1116 | THR | C | 1117 | THR |
|   |      |     | B | 1117 | THR | C | 1118 | ASP |
|   |      |     | B | 1118 | ASP | C | 1119 | ASN |
|   |      |     | B | 1119 | ASN | C | 1120 | THR |
|   |      |     | B | 1120 | THR | C | 1121 | PHE |
|   |      |     | B | 1121 | PHE | C | 1122 | VAL |
|   |      |     | B | 1122 | VAL | C | 1123 | SER |
|   |      |     | B | 1123 | SER | C | 1124 | GLY |
|   |      |     | B | 1124 | GLY | C | 1125 | ASN |
|   |      |     | B | 1125 | ASN | C | 1126 | CYS |
|   |      |     |   |      |     | C | 1127 | ASP |
|   |      |     |   |      |     | C | 1128 | VAL |
|   |      |     |   |      |     | C | 1129 | VAL |
|   |      |     |   |      |     | C | 1130 | ILE |
