# Supplementary material for: Single-Particle Characterization of SARS-CoV-2 Isoelectric Point and Comparison to Variants of Interest
Source: MDPI journal article supplement (doi:10.3390/microorganisms9081606), 2021-07-28
Supplement: s1 [file s1]

**Single-Particle Characterization of SARS-CoV-2 Isoelectric Point and Comparison to  
Variants of Interest**  
(Supplementary Information)

Oluwatoyin Areo<sup>1,2</sup>, Pratik U. Joshi<sup>1,2</sup>, Mark Obrenovich<sup>3,4,5</sup> Moncef Tayahi<sup>6</sup>, and Caryn L. Heldt<sup>1,2\*</sup>

<sup>1</sup> Department of Chemical Engineering, Michigan Technological University, Houghton, MI USA.

<sup>2</sup> Health Research Institute, Michigan Technological University, Houghton, MI

<sup>3</sup> Louis Stokes Department of Veterans Affairs Medical Center, Department of Infectious Disease, Cleveland, OH 44106 USA.

<sup>4</sup> The Gilgamesh Foundation for Medical Science, Research and Education, Cleveland, OH 44116 USA

<sup>5</sup> Case Western Reserve University, Department of Chemistry, Cleveland, OH USA.

<sup>6</sup> University of Cincinnati, Department of Electrical Engineering and Computer Science, Cincinnati, OH 45221

\*Corresponding author: 1400 Townsend Dr., Houghton, MI 49931, USA

[heldt@mtu.edu](mailto:heldt@mtu.edu), phone 906-487-1134

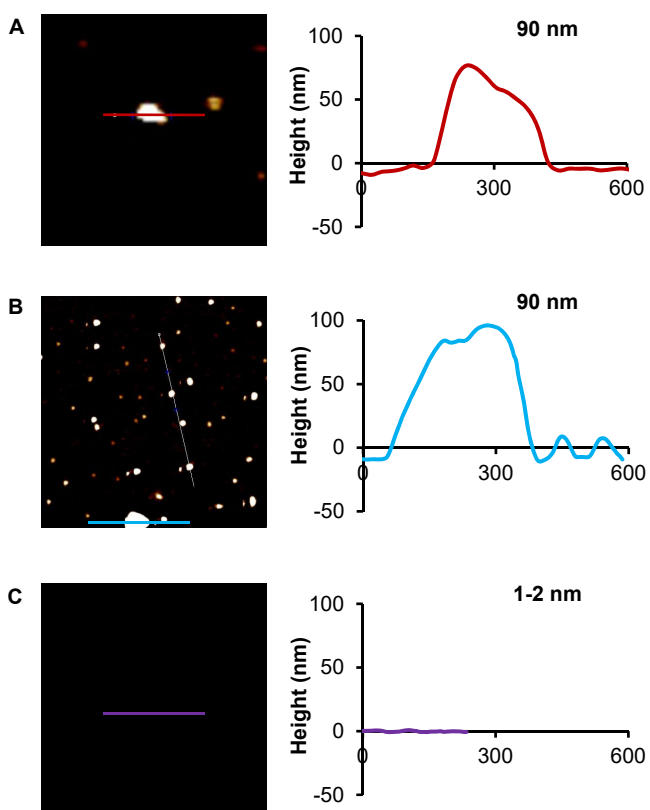

**Figure S1. Topographic image and corresponding height analysis of virus and control surface.** (a) SARS-CoV-2 gamma irradiated. (b) SARS-CoV-2 heat inactivated and (c) Control surface. Scan size for viruses -  $3\mu\text{m} \times 3\mu\text{m}$ , control –  $500\text{nm} \times 500\text{nm}$

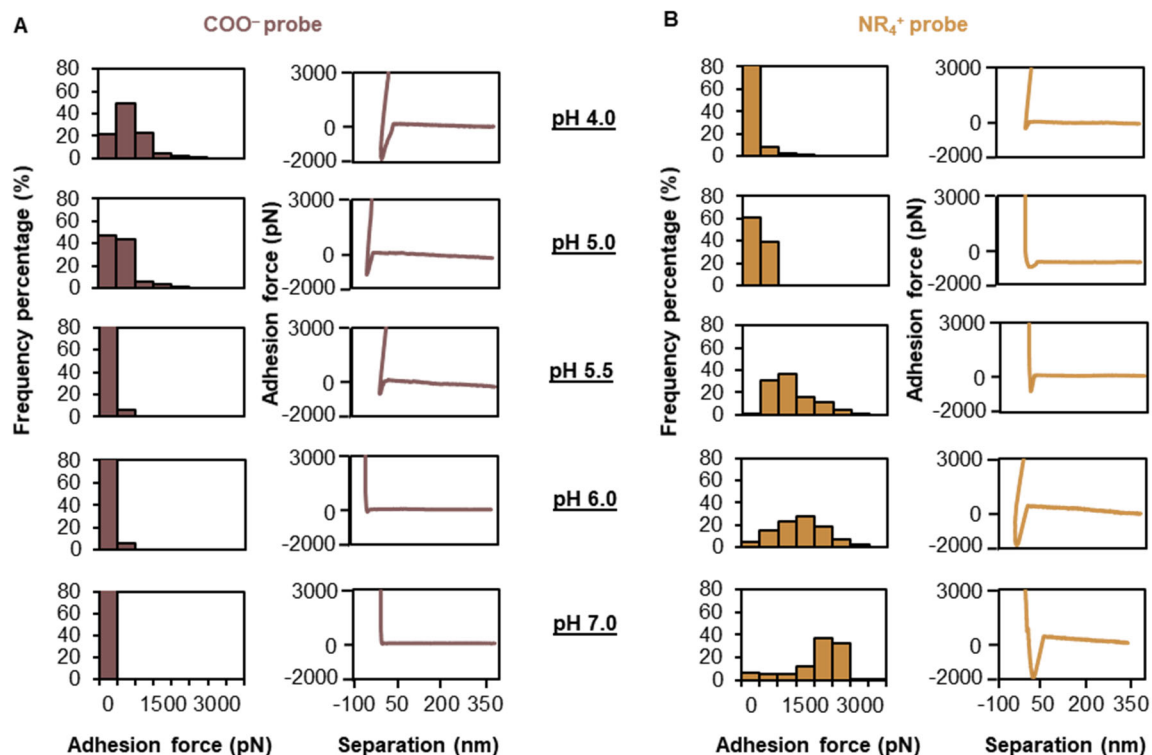

**Figure S2. Adhesion and representative force–distance curves (retracted portion only) of irradiated SARS-CoV-2.** (a) COO<sup>-</sup>-terminated probe and (b) NR<sub>4</sub><sup>+</sup>-terminated probe, recorded in 20 mM citrate (pH 4-6) or phosphate buffers (pH 7). Each figure represents 450 *F–D* curves.

**Table S1: Surface hydrophobicity comparison among the WT and VOI**

| Pango Lineage                     | PDB  | Total Surface Residues | Hydrophobicity |
|-----------------------------------|------|------------------------|----------------|
| WT<br>(Natural variant)           | 6VSB | 2454                   | 29             |
| B.1.1.7<br>(UK variant)           | 7LWV | 2089                   | -146           |
| B.1.351<br>(South Africa variant) | 7LYQ | 1992                   | -191           |

The surface residues of the WT and VOI were found by in PyMol using ‘findSurfaceResidue’ script. Surface hydrophobicity was calculated by summing the individual hydrophobicity values of residues assigned as per the Eisenberg hydrophobicity scale.

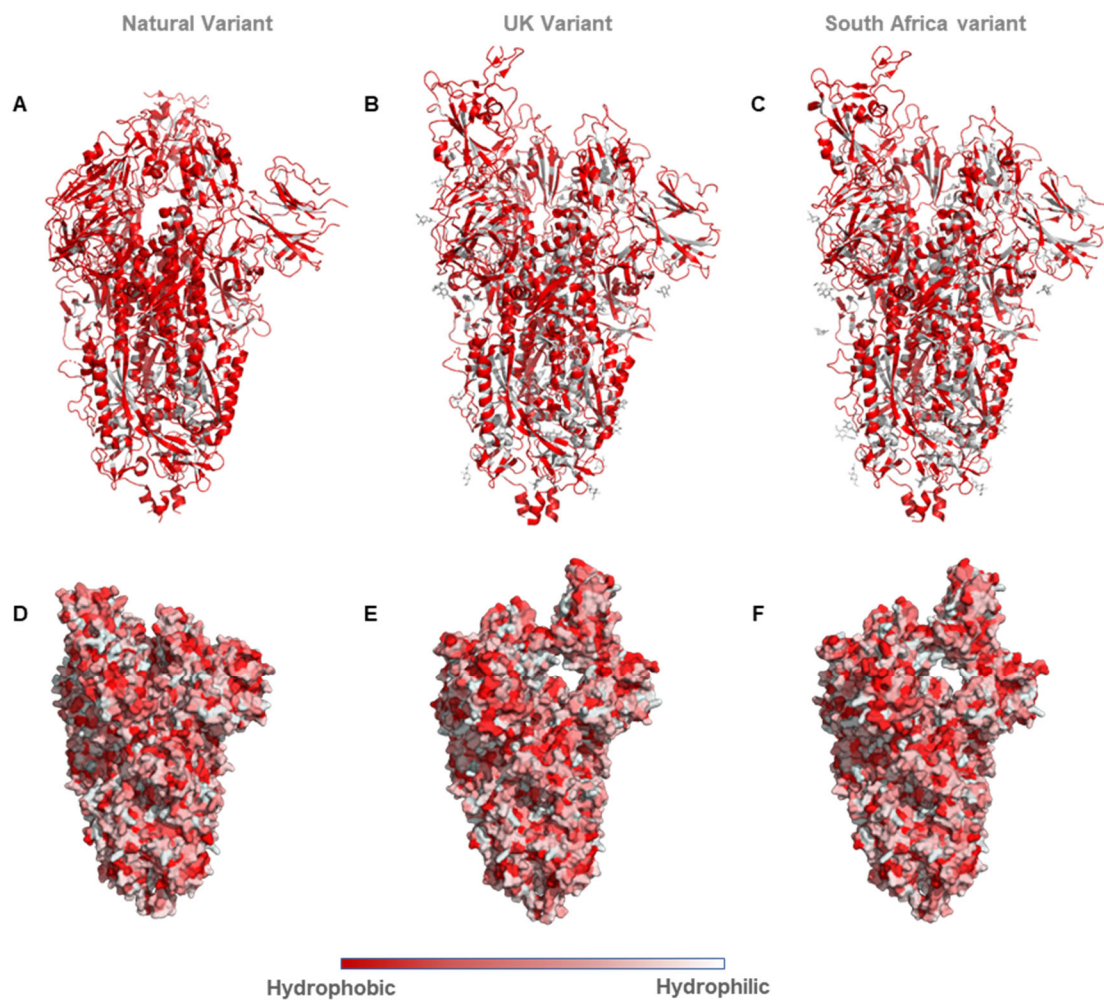

**Figure S3. Surface characteristics of S-proteins of WT and VOI.** (A) Surface residues (marked in red) (B) Surface hydrophobicity map of S-proteins.
